# Supplementary material
Source: Research Square preprint supplement (doi:10.21203/rs.3.rs-9705845/v1)
Supplement: Supplementary file 1 [file 8c3969fe1bb1c3ae98e9a555.xlsx]

## Sheet: Sheet1
id	province	city	year	Y	SBM-GML	X1	X2	X3	X	IV	fixed investments	X_pca	RGDP	OPEN	LAB	FIS	GOV	GRE	ENVO	IND
1	辽宁	大连	2006	1	1	0.272455	0.74834	1.42701	0.118517	0.133339	12116900	0.0946362	10.3386	1.08466	0.0288756	0.0326559	0.123664	0.262504	11	0.0237727
1	辽宁	大连	2007	1.16917	1.16917	0.262037	0.775665	1.54329	0.123625	0.133339	16166200	0.266496	10.5012	1.08864	0.0315421	0.0302047	0.135888	0.266542	19	0.023784
1	辽宁	大连	2008	1.28674	1.10056	0.252757	0.699669	1.47504	0.111485	0.133339	21345000	-0.0510612	10.6537	1.056	0.0330531	0.0240148	0.138814	0.188101	36	0.023747
1	辽宁	大连	2009	1.43166	1.11262	0.282944	0.711918	1.42738	0.115317	0.133339	29699300	-0.0219023	10.7498	0.847582	0.033949	0.0218132	0.144897	0.183878	29	0.0237728
1	辽宁	大连	2010	1.49902	1.04705	0.263878	0.724288	1.48247	0.115998	0.133339	39854800	0.0470028	10.8392	0.955519	0.0352324	0.0311043	0.171941	0.31992	31	0.0236934
1	辽宁	大连	2011	1.50258	1.00237	0.235268	0.78809	1.40023	0.11829	0.133339	45535600	0.183067	10.9865	0.917278	0.0365772	0.0203378	0.178345	0.245462	43	0.023606
1	辽宁	大连	2012	1.56347	1.04052	0.257186	0.787358	1.4162	0.121201	0.133339	56244000	0.208762	11.0754	0.876667	0.0377905	0.031266	0.197776	0.250146	32	0.0236087
1	辽宁	大连	2013	1.48286	0.948443	0.257777	0.793308	1.42705	0.122277	0.133339	64781000	0.237597	11.1597	0.85454	0.0395802	0.0475975	0.220986	0.311456	30	0.0237655
1	辽宁	大连	2014	1.46613	0.988719	0.281942	0.854707	1.53386	0.135387	0.133339	67736300	0.544887	11.2145	0.765624	0.0409828	0.0402555	0.190945	0.266463	22	0.02392
1	辽宁	大连	2015	1.54645	1.05478	0.355591	0.801881	1.68467	0.141525	0.133339	45592800	0.530807	11.2553	0.635407	0.0415092	0.0612544	0.168643	0.278675	26	0.0244303
1	辽宁	大连	2016	1.78989	1.15742	0.484076	0.776107	1.73845	0.15494	0.133339	14363600	0.578398	11.3002	0.605299	0.0415367	0.0457472	0.154086	0.289527	35	0.0245149
1	辽宁	大连	2017	1.80966	1.01104	0.528923	0.826765	1.85926	0.169541	0.133339	16527700	0.874741	11.3692	0.689324	0.0407636	0.0433231	0.151984	0.258098	33	0.0246229
1	辽宁	大连	2018	2.00458	1.10771	0.596459	0.841373	1.77333	0.177085	0.133339	18191200	0.911525	11.439	0.735127	0.0399921	0.0457644	0.154054	0.286972	52	0.0248655
1	辽宁	大连	2019	2.05868	1.02699	0.665077	0.84705	1.71287	0.184323	0.133339	14589343	0.93742	11.4565	0.62455	0.03929	0.0462718	0.145391	0.253416	42	0.0246715
1	辽宁	大连	2020	2.1822	1.06	0.748413	0.814083	1.52589	0.185314	0.133339	14602473	0.748342	11.4501	0.547843	0.0436998	0.0427547	0.143132	0.343496	23	0.0246824
1	辽宁	大连	2021	2.66593	1.22167	0.719669	0.803309	1.70448	0.185212	0.133339	14783544	0.822283	11.557	0.541841	0.0445813	0.0309816	0.125236	0.296296	38	0.0244768
1	辽宁	大连	2022	4.24796	1.59343	0.700412	0.759328	1.81417	0.180395	0.133339	15892310	0.738631	11.6221	0.575649	0.044426	0.0382512	0.117986	0.376148	58	0.0243588
1	辽宁	大连	2023	4.80881	1.71486	0.716515	0.73144	1.92386	0.181721	0.133339	15987664	0.736462	11.6622	0.520152	0.0435722	0.0300769	0.11579	0.568163	67	0.0243937
1	辽宁	大连	2024	5.36966	1.83629	0.725834	0.711416	1.96179	0.181355	0.133339	1.56561e+07	0.702994	11.7452	0.472494	0.042645	0.0326052	0.114018	0.668285	39	0.0252501
2	辽宁	丹东	2006	1	1	0.272455	0.457049	1.34783	0.0808947	0.167003	1293600	-0.960892	9.35079	0.491049	0.00816751	0.0909201	0.168442	0.254528	19	0.0221363
2	辽宁	丹东	2007	1.09517	1.09517	0.262037	0.5654	1.22084	0.0896223	0.167003	1957000	-0.69192	9.51938	0.46326	0.00859024	0.0942978	0.180759	0.19441	15	0.0221728
2	辽宁	丹东	2008	1.0983	1.00286	0.252757	0.464094	1.18723	0.0752851	0.167003	2967600	-1.07044	9.69313	0.329624	0.00919575	0.105682	0.200335	0.240135	24	0.0220705
2	辽宁	丹东	2009	1.03992	0.946847	0.282944	0.492228	0.681677	0.0692422	0.167003	4440500	-1.32608	9.78488	0.316211	0.00966033	0.141051	0.256432	0.237716	13	0.0218552
2	辽宁	丹东	2010	1.24842	1.20049	0.263878	0.518189	0.876596	0.0751907	0.167003	6294300	-1.1071	9.89675	0.40856	0.00990483	0.112166	0.277522	0.227849	14	0.0215572
2	辽宁	丹东	2011	0.93789	0.751265	0.235268	0.544851	0.85147	0.0744199	0.167003	6902500	-1.05583	10.0485	0.444328	0.00995694	0.0949228	0.279101	0.329886	15	0.0214918
2	辽宁	丹东	2012	0.956624	1.01997	0.257186	0.543932	0.815595	0.0759707	0.167003	8532500	-1.06918	10.1581	0.462422	0.0105131	0.109888	0.3138	0.250173	14	0.0216262
2	辽宁	丹东	2013	0.875027	0.914703	0.257777	0.578121	0.878678	0.0818442	0.167003	10036500	-0.905007	10.2425	0.465276	0.01078	0.129155	0.329394	0.255952	26	0.0218856
2	辽宁	丹东	2014	0.84693	0.96789	0.281942	0.620595	1.09753	0.0955334	0.167003	9126000	-0.579495	10.2927	0.394965	0.0111762	0.111944	0.288497	0.354617	14	0.0225809
2	辽宁	丹东	2015	0.887345	1.04772	0.355591	0.620504	1.12578	0.10495	0.167003	5834600	-0.503878	10.243	0.379377	0.0111626	0.168359	0.26646	0.220866	21	0.0228404
2	辽宁	丹东	2016	1.04438	1.17697	0.484076	0.599686	1.07954	0.116389	0.167003	2802000	-0.513417	10.2618	0.383738	0.011005	0.172122	0.271593	0.356107	27	0.0238093
2	辽宁	丹东	2017	1.06512	1.01985	0.528923	0.723618	1.02258	0.135354	0.167003	2405600	-0.0979811	10.305	0.321337	0.0105303	0.178632	0.280265	0.222434	26	0.0238051
2	辽宁	丹东	2018	1.20002	1.12666	0.596459	0.621636	0.858323	0.126636	0.167003	2082000	-0.518216	10.3344	0.202283	0.00998246	0.193614	0.293186	0.332754	41	0.023678
2	辽宁	丹东	2019	1.18096	0.984115	0.665077	0.584124	1.08136	0.135914	0.167003	2.28645e+06	-0.43014	10.3817	0.200883	0.0110786	0.208828	0.306672	0.29997	34	0.0237511
2	辽宁	丹东	2020	1.26747	1.07325	0.748413	0.509046	1.04749	0.135712	0.167003	2.61662e+06	-0.649924	10.4826	0.150273	0.0153516	0.215175	0.314745	0.266456	28	0.0236095
2	辽宁	丹东	2021	1.37571	1.0854	0.719669	0.477689	1.04283	0.128367	0.167003	3056731	-0.782154	10.5887	0.147274	0.0182248	0.136495	0.232202	0.251554	31	0.0233805
2	辽宁	丹东	2022	1.48018	1.07594	0.700412	0.448106	0.987267	0.121045	0.167003	2919178	-0.938936	10.6477	0.178728	0.00950284	0.183844	0.26014	0.395561	46	0.0232396
2	辽宁	丹东	2023	1.55021	1.06325	0.716515	0.437047	0.9317	0.120163	0.167003	3.35705e+06	-1.00592	10.7184	0.180506	0.0178595	0.174401	0.253399	0.667913	37	0.0233855
2	辽宁	丹东	2024	1.62025	1.05057	0.725834	0.407583	0.953039	0.118215	0.167003	3.70337e+06	-1.08398	10.7936	0.169618	0.0199024	0.155537	0.235315	0.800803	27	0.0233915
3	辽宁	锦州	2006	1	1	0.272455	0.574196	1.51816	0.0995985	0.0988521	997900	-0.43382	9.56929	0.159931	0.0199609	0.0660684	0.110874	0.187026	7	0.0219303
3	辽宁	锦州	2007	1.05433	1.05433	0.262037	0.60028	1.59556	0.103551	0.0988521	1432300	-0.294998	9.7537	0.178539	0.0213954	0.0667249	0.113852	0.172467	20	0.0219035
3	辽宁	锦州	2008	1.12732	1.06923	0.252757	0.570539	1.6616	0.100526	0.0988521	2153800	-0.354801	9.98373	0.121765	0.0231102	0.0668306	0.11762	0.195504	16	0.0220209
3	辽宁	锦州	2009	1.23204	1.09289	0.282944	0.579564	1.46272	0.100063	0.0988521	2819000	-0.44868	10.0406	0.164076	0.024136	0.0872325	0.153242	0.204265	24	0.0217297
3	辽宁	锦州	2010	1.19126	0.966902	0.263878	0.576715	1.43821	0.0968305	0.0988521	6588200	-0.490818	10.2729	0.171932	0.0243342	0.0628676	0.151699	0.240234	13	0.0219226
3	辽宁	锦州	2011	1.14198	0.958633	0.235268	0.617676	1.41241	0.0977886	0.0988521	6493100	-0.39112	10.4805	0.15101	0.02435	0.0480755	0.140892	0.287584	20	0.0219354
3	辽宁	锦州	2012	1.07853	0.944434	0.257186	0.643544	1.3643	0.102296	0.0988521	8037000	-0.321857	10.5932	0.15381	0.0253811	0.0589117	0.164731	0.247769	14	0.0219787
3	辽宁	锦州	2013	1.02877	0.953866	0.257777	0.645398	1.55216	0.107439	0.0988521	9521400	-0.175926	10.6787	0.161392	0.025994	0.0655284	0.166716	0.220075	15	0.0221109
3	辽宁	锦州	2014	0.976062	0.948766	0.281942	0.651542	1.4936	0.109533	0.0988521	9709600	-0.180221	10.6997	0.190339	0.026526	0.0671735	0.167501	0.274369	16	0.022404
3	辽宁	锦州	2015	0.954499	0.977908	0.355591	0.618581	1.53994	0.115401	0.0988521	7821500	-0.203696	10.6751	0.113956	0.0262643	0.100982	0.157877	0.339675	19	0.0225301
3	辽宁	锦州	2016	1.08567	1.13742	0.484076	0.512139	1.52331	0.117146	0.0988521	3797800	-0.484327	10.4258	0.129011	0.0255599	0.128079	0.210195	0.384479	19	0.0225985
3	辽宁	锦州	2017	1.20508	1.10999	0.528923	0.538599	1.42407	0.123114	0.0988521	3577500	-0.433784	10.4725	0.152759	0.025097	0.135772	0.220477	0.378522	18	0.0232934
3	辽宁	锦州	2018	1.29125	1.07151	0.596459	0.719056	1.53623	0.156027	0.0988521	3385900	0.317306	10.5797	0.195699	0.02475	0.14111	0.22526	0.326721	27	0.0234823
3	辽宁	锦州	2019	0.849311	0.657744	0.665077	0.907336	2.08518	0.201293	0.0988521	3.56163e+06	1.4195	10.4765	0.219549	0.0256645	0.241342	0.336425	0.295095	33	0.0237026
3	辽宁	锦州	2020	0.841662	0.990994	0.748413	0.82778	2.12129	0.20235	0.0988521	3.57766e+06	1.23623	10.5905	0.132368	0.0331138	0.183637	0.280761	0.36849	30	0.0236085
3	辽宁	锦州	2021	0.913951	1.08589	0.719669	0.997332	2.32095	0.224817	0.0988521	3831669	1.9429	10.6699	0.111874	0.0343066	0.0914993	0.186769	0.321026	40	0.0237107
3	辽宁	锦州	2022	0.999791	1.09392	0.700412	0.909006	2.43182	0.214614	0.0988521	4.17269e+06	1.70836	10.7266	0.0808375	0.0382866	0.128868	0.215324	0.345722	49	0.023497
3	辽宁	锦州	2023	0.926927	1.09953	0.716515	0.849405	2.54268	0.212097	0.0988521	4485639	1.59853	10.7714	0.0619104	0.0391486	0.131344	0.22253	0.530517	44	0.0237027
3	辽宁	锦州	2024	0.854063	1.10513	0.725834	0.887604	2.82854	0.225239	0.0988521	4.74706e+06	1.94795	10.8625	0.0623317	0.0416345	0.138298	0.227985	0.597845	31	0.0237596
4	辽宁	营口	2006	1	1	0.272455	0.716893	1.42036	0.114505	0.161253	2443000	-0.0179094	9.82653	0.288431	0.00332672	0.051261	0.096043	0.276195	15	0.022572
4	辽宁	营口	2007	1.07089	1.07089	0.262037	0.790047	1.38634	0.121332	0.161253	3606100	0.19947	10.0478	0.251772	0.00397843	0.0565157	0.107455	0.231421	11	0.0225408
4	辽宁	营口	2008	1.20248	1.12288	0.252757	0.756381	1.30581	0.114046	0.161253	4523500	0.0176726	10.2588	0.235457	0.00417195	0.0529778	0.109838	0.264657	24	0.0225005
4	辽宁	营口	2009	1.2473	1.03727	0.282944	0.821123	1.30027	0.125376	0.161253	6691500	0.257681	10.3968	0.14162	0.00432005	0.0610051	0.131822	0.223497	27	0.0226958
4	辽宁	营口	2010	1.22278	0.980342	0.263878	0.859824	1.25939	0.126797	0.161253	10219300	0.34561	10.6147	0.197294	0.00426023	0.037091	0.136953	0.256306	22	0.022926
4	辽宁	营口	2011	1.15277	0.942749	0.235268	0.891131	1.02829	0.121278	0.161253	8757900	0.260205	10.8162	0.228691	0.00428646	0.0350425	0.149557	0.223086	30	0.0230158
4	辽宁	营口	2012	1.21502	1.054	0.257186	0.8817	1.00006	0.121987	0.161253	10850900	0.223393	10.9378	0.251003	0.00476379	0.0367911	0.160032	0.206616	13	0.02315
4	辽宁	营口	2013	1.2237	1.00714	0.257777	0.874452	1.07589	0.123128	0.161253	12711900	0.255194	11.0307	0.273846	0.00557465	0.0419693	0.163741	0.259095	14	0.02328
4	辽宁	营口	2014	1.22431	1.0005	0.281942	0.874782	1.40191	0.134435	0.161253	11612600	0.51585	11.0542	0.27277	0.006352	0.0383503	0.14207	0.257487	13	0.023545
4	辽宁	营口	2015	1.16332	0.950184	0.355591	0.705768	1.61698	0.128039	0.161253	9062200	0.151747	11.0343	0.270819	0.00716905	0.0448766	0.113626	0.192959	18	0.0237313
4	辽宁	营口	2016	1.11313	0.956853	0.484076	0.7184	1.47242	0.141027	0.161253	4101900	0.183862	10.7661	0.310624	0.0078377	0.0801764	0.171146	0.205901	37	0.0240035
4	辽宁	营口	2017	1.1152	1.00186	0.528923	0.864963	1.50834	0.165152	0.161253	4599500	0.745536	10.8612	0.292565	0.00807998	0.0810996	0.170574	0.309744	26	0.0241168
4	辽宁	营口	2018	1.18283	1.06065	0.596459	0.692518	1.60643	0.154597	0.161253	4388300	0.278481	10.9215	0.320504	0.00836334	0.0716069	0.169126	0.24915	28	0.0240386
4	辽宁	营口	2019	1.29704	1.09655	0.665077	0.683207	2.33253	0.180299	0.161253	4.39006e+06	0.835681	10.9084	0.356648	0.00978239	0.0902298	0.190454	0.350653	20	0.0238442
4	辽宁	营口	2020	1.35728	1.04645	0.748413	0.672697	2.76707	0.200071	0.161253	4497612	1.18382	10.9491	0.354033	0.0127171	0.103253	0.205726	0.381115	17	0.0239774
4	辽宁	营口	2021	1.40329	1.03389	0.719669	0.619927	3.33031	0.204763	0.161253	4301516	1.39894	11.0136	0.380249	0.0140061	0.0813992	0.182179	0.38455	36	0.0237996
4	辽宁	营口	2022	1.45242	1.03502	0.700412	0.623982	3.77622	0.214489	0.161253	4344531	1.72872	11.0449	0.335968	0.0142891	0.0852528	0.175602	0.403379	56	0.0238247
4	辽宁	营口	2023	1.51982	1.02861	0.716515	0.602737	4.22213	0.225302	0.161253	4670371	1.99832	11.0865	0.321871	0.0144744	0.0770878	0.169752	0.521493	44	0.0240645
4	辽宁	营口	2024	1.58722	1.0222	0.725834	0.586489	5.14578	0.24825	0.161253	4.7323e+06	2.63382	11.1504	0.291212	0.0146576	0.0687688	0.15888	0.609631	27	0.0250625
5	辽宁	盘锦	2006	1	1	0.272455	0.331616	0.438572	0.0421127	0.228638	1845000	-2.06364	10.4497	0.0250596	0.0020442	0.0285681	0.0808515	0.220601	17	0.0206891
5	辽宁	盘锦	2007	1.01711	1.01711	0.262037	0.383839	0.451544	0.0475959	0.228638	2480200	-1.88309	10.5545	0.0374316	0.0027866	0.0331756	0.0870376	0.201337	15	0.0207522
5	辽宁	盘锦	2008	0.995703	0.978956	0.252757	0.407648	0.449888	0.0493652	0.228638	3287400	-1.80976	10.7233	0.0389329	0.00358049	0.0358245	0.0893272	0.221258	35	0.0208171
5	辽宁	盘锦	2009	0.965944	0.970113	0.282944	0.502787	0.48007	0.0653299	0.228638	4748900	-1.43927	10.7779	0.0371886	0.00362154	0.0573917	0.120415	0.20287	25	0.0217939
5	辽宁	盘锦	2010	1.13289	1.17283	0.263878	0.524173	0.489245	0.0659271	0.228638	7837200	-1.37353	10.9411	0.040036	0.00375165	0.036031	0.135357	0.28703	28	0.0219364
5	辽宁	盘锦	2011	1.17163	1.0342	0.235268	0.558969	0.511511	0.0673726	0.228638	7803700	-1.25932	11.1434	0.052052	0.00345872	0.0320591	0.145113	0.212985	29	0.0218496
5	辽宁	盘锦	2012	1.20322	1.02696	0.257186	0.567857	0.529345	0.0715071	0.228638	9677200	-1.19932	11.2088	0.0661535	0.00395703	0.0395679	0.171813	0.301382	23	0.0219274
5	辽宁	盘锦	2013	1.07323	0.891967	0.257777	0.54346	0.608403	0.0706368	0.228638	11376900	-1.22382	11.2301	0.0746706	0.00435605	0.0429007	0.180176	0.241367	20	0.0221646
5	辽宁	盘锦	2014	1.03028	0.95998	0.281942	0.612022	0.605827	0.081799	0.228638	11574000	-0.973039	11.2639	0.0501694	0.0049	0.0471595	0.181834	0.327515	29	0.0232328
5	辽宁	盘锦	2015	1.01292	0.98315	0.355591	0.570419	0.636446	0.0862061	0.228638	9830600	-1.03773	11.2225	0.0515867	0.00493598	0.0727875	0.161218	0.234183	25	0.0233951
5	辽宁	盘锦	2016	1.05856	1.04505	0.484076	0.504451	0.62347	0.0929891	0.228638	6014200	-1.17714	11.1318	0.145722	0.00478064	0.0842447	0.186682	0.394433	52	0.0236239
5	辽宁	盘锦	2017	1.3423	1.26804	0.528923	0.547383	0.673423	0.104819	0.228638	6038700	-0.959726	11.2367	0.0994714	0.00472025	0.0603133	0.169345	0.331954	27	0.0235058
5	辽宁	盘锦	2018	1.56364	1.1649	0.596459	0.536717	0.732533	0.113018	0.228638	4798500	-0.902003	11.3443	0.139181	0.00486657	0.0574273	0.169043	0.328565	55	0.0233462
5	辽宁	盘锦	2019	1.72351	1.10224	0.665077	0.525695	0.487786	0.113461	0.228638	4551377	-1.06976	11.397	0.166432	0.00562708	0.0662468	0.181629	0.319756	56	0.0230568
5	辽宁	盘锦	2020	1.90089	1.10292	0.748413	0.522742	0.60324	0.125922	0.228638	4234601	-0.93211	11.4977	0.157667	0.00653128	0.0663738	0.188907	0.358713	42	0.0229406
5	辽宁	盘锦	2021	1.98534	1.04443	0.719669	0.571409	0.650974	0.129703	0.228638	4.05082e+06	-0.75167	11.5227	0.228872	0.00673813	0.0269796	0.139938	0.375994	42	0.0229795
5	辽宁	盘锦	2022	2.08763	1.05153	0.700412	0.555538	0.669286	0.125963	0.228638	3.4432e+06	-0.806802	11.5167	0.0944091	0.00716557	0.0664492	0.15349	0.371578	38	0.0229373
5	辽宁	盘锦	2023	2.21863	1.02318	0.716515	0.508552	0.687598	0.122598	0.228638	3.20217e+06	-0.942012	11.5144	0.0761061	0.00748165	0.058213	0.152013	0.395132	45	0.0233985
5	辽宁	盘锦	2024	2.34963	0.99484	0.725834	0.503933	0.692714	0.123267	0.228638	2.95593e+06	-0.947068	11.5398	0.107694	0.0076715	0.0497347	0.149133	0.410529	41	0.0234814
6	辽宁	葫芦岛	2006	1	1	0.272455	0.661448	1.29765	0.104566	0.107636	909800	-0.298543	9.49723	0.237585	0.00291593	0.101971	0.158715	0.248359	16	0.0224102
6	辽宁	葫芦岛	2007	1.05971	1.05971	0.262037	0.671233	1.31716	0.105035	0.107636	1149200	-0.258386	9.67966	0.237723	0.00403019	0.0847559	0.143794	0.248072	24	0.0223002
6	辽宁	葫芦岛	2008	1.08558	1.02441	0.252757	0.605987	1.45107	0.0994243	0.107636	1591300	-0.38942	9.77259	0.147438	0.00506661	0.0853482	0.153941	0.201953	26	0.0224516
6	辽宁	葫芦岛	2009	1.08243	0.997096	0.282944	0.655524	1.16623	0.101691	0.107636	2194100	-0.408329	9.7465	0.155406	0.00511548	0.124115	0.20785	0.285134	22	0.0228516
6	辽宁	葫芦岛	2010	1.06819	0.986844	0.263878	0.616591	1.05508	0.0918153	0.107636	3568700	-0.638137	9.92404	0.171235	0.00542986	0.100762	0.206025	0.277341	27	0.0226563
6	辽宁	葫芦岛	2011	1.10488	1.03434	0.235268	0.603878	1.23237	0.0914579	0.107636	4442800	-0.571691	10.1272	0.127729	0.00558713	0.117665	0.225817	0.234216	20	0.0225996
6	辽宁	葫芦岛	2012	1.14706	1.03818	0.257186	0.592769	1.30188	0.0944832	0.107636	5467100	-0.541856	10.2306	0.118858	0.00605195	0.11513	0.231873	0.289113	18	0.0225667
6	辽宁	葫芦岛	2013	0.9944	0.866915	0.257777	0.606651	1.26244	0.0952309	0.107636	6326400	-0.523121	10.3081	0.106156	0.00643581	0.118934	0.232951	0.330195	22	0.0226877
6	辽宁	葫芦岛	2014	0.909783	0.914907	0.281942	0.617491	1.26957	0.0995932	0.107636	5448900	-0.462692	10.2407	0.158023	0.00678097	0.118865	0.231965	0.354754	28	0.0229371
6	辽宁	葫芦岛	2015	0.990648	1.08888	0.355591	0.606117	1.36613	0.109394	0.107636	1904500	-0.375088	10.2462	0.138379	0.00711228	0.150909	0.230247	0.335821	26	0.0229878
6	辽宁	葫芦岛	2016	1.14128	1.15205	0.484076	0.592621	1.36769	0.122961	0.107636	1780300	-0.324162	10.1412	0.0754649	0.00699804	0.194665	0.288454	0.298446	49	0.023147
6	辽宁	葫芦岛	2017	1.29047	1.13072	0.528923	0.676736	1.4314	0.140176	0.107636	2230400	0.0443897	10.2466	0.140481	0.00695132	0.175619	0.277026	0.333974	9	0.0227763
6	辽宁	葫芦岛	2018	1.46963	1.13884	0.596459	0.669573	1.57732	0.151043	0.107636	2456800	0.178398	10.3739	0.101788	0.00695943	0.191793	0.293009	0.377706	45	0.0227316
6	辽宁	葫芦岛	2019	1.64497	1.11931	0.665077	0.645621	0.956208	0.140196	0.107636	2703954	-0.31238	10.3677	0.122529	0.00770595	0.203294	0.307723	0.281778	12	0.0229581
6	辽宁	葫芦岛	2020	1.6101	0.978801	0.748413	0.623497	1.03602	0.149396	0.107636	2820224	-0.266742	10.364	0.127113	0.00859811	0.239064	0.329277	0.432264	16	0.0229665
6	辽宁	葫芦岛	2021	1.71244	1.06356	0.719669	0.587682	1.17324	0.145167	0.107636	2.54582e+06	-0.309138	10.4638	0.070221	0.00502955	0.2025	0.278818	0.348345	34	0.0228218
6	辽宁	葫芦岛	2022	1.82228	1.06414	0.700412	0.561961	1.2637	0.142085	0.107636	2585000	-0.344541	10.5157	0.050445	0.0024527	0.192401	0.260286	0.389548	50	0.0226958
6	辽宁	葫芦岛	2023	1.91044	1.04547	0.716515	0.533139	1.35417	0.1428	0.107636	2988260	-0.364144	10.5715	0.0646388	0.00138627	0.181374	0.2562	0.514713	68	0.0229421
6	辽宁	葫芦岛	2024	1.9986	1.0268	0.725834	0.509411	1.34626	0.140799	0.107636	3.11836e+06	-0.444241	10.6766	0.0527901	0.00088454	0.160593	0.235464	0.568812	56	0.0234588
7	河北	秦皇岛	2006	1	1	0.437539	0.618101	1.63004	0.127346	0.134264	1755400	-0.0773975	9.77336	0.45212	0.0410094	0.0448801	0.108649	0.164572	18.244	0.0234393
7	河北	秦皇岛	2007	1.11812	1.11812	0.455087	0.615234	1.59276	0.128107	0.134264	1992578	-0.101721	9.95707	0.435375	0.042471	0.0496516	0.117013	0.158224	21.9506	0.0230325
7	河北	秦皇岛	2008	1.19198	1.06606	0.453767	0.539318	1.58823	0.118561	0.134264	2365107	-0.365865	10.1085	0.478508	0.0438764	0.0626787	0.129728	0.278355	26.4104	0.0229369
7	河北	秦皇岛	2009	1.16489	0.977268	0.916952	0.566998	1.51548	0.174772	0.134264	3290832	0.0209155	10.1574	0.295019	0.0453593	0.0617224	0.135099	0.238904	31.7762	0.0230682
7	河北	秦皇岛	2010	1.20616	1.03543	0.859687	0.595732	1.51181	0.171423	0.134264	4096667	0.0737642	10.2876	0.270549	0.046955	0.0725725	0.154593	0.188399	38.2323	0.0228047
7	河北	秦皇岛	2011	1.16138	0.962867	0.77263	0.624704	1.53695	0.165329	0.134264	5980309	0.126512	10.4241	0.277486	0.0483823	0.0809828	0.166578	0.217543	46	0.0230084
7	河北	秦皇岛	2012	1.09546	0.943246	0.805745	0.628297	1.4477	0.167376	0.134264	7237352	0.0974318	10.4877	0.257128	0.0515195	0.084303	0.184625	0.267013	41	0.0229691
7	河北	秦皇岛	2013	1.04626	0.955089	0.863385	0.624782	1.63403	0.178562	0.134264	7702882	0.266469	10.5107	0.242729	0.0558937	0.0813916	0.179533	0.247191	46	0.0229958
7	河北	秦皇岛	2014	1.06505	1.01796	0.835704	0.665077	1.69156	0.181699	0.134264	7916533	0.426304	10.5322	0.231109	0.0507132	0.085752	0.184898	0.312037	72	0.0230943
7	河北	秦皇岛	2015	1.09216	1.02546	0.947729	0.627572	1.65492	0.189404	0.134264	8743325	0.354481	10.5701	0.240447	0.0507225	0.0955352	0.191429	0.244159	61	0.0234012
7	河北	秦皇岛	2016	1.18575	1.08569	0.358909	0.590529	1.8431	0.120189	0.134264	8746590	-0.0726749	10.6131	0.232911	0.0500117	0.103405	0.195993	0.311147	97	0.0234284
7	河北	秦皇岛	2017	1.29722	1.09401	1.14173	0.599353	2.37303	0.227399	0.134264	8733903	0.934698	10.72	0.240704	0.0497299	0.102918	0.187562	0.313982	79	0.0237636
7	河北	秦皇岛	2018	1.41301	1.08925	1.18134	0.600418	2.0611	0.22416	0.134264	9161864	0.736886	10.7873	0.235517	0.0485692	0.104699	0.193222	0.306274	48	0.0239216
7	河北	秦皇岛	2019	1.52226	1.07732	1.37926	0.609049	1.69546	0.239155	0.134264	9812356	0.643412	10.8511	0.222741	0.0489262	0.107818	0.19723	0.297232	51	0.0241988
7	河北	秦皇岛	2020	1.59237	1.04606	1.79118	0.605183	1.58487	0.284482	0.134264	10253912	0.855912	10.8819	0.213983	0.0476753	0.108829	0.203707	0.363812	41	0.0239022
7	河北	秦皇岛	2021	1.63849	1.02897	1.67975	0.598086	1.67264	0.272718	0.134264	10787115	0.813408	10.9823	0.217243	0.0483712	0.0752267	0.168632	0.331629	51	0.023838
7	河北	秦皇岛	2022	1.68642	1.02925	1.58565	0.607353	1.67949	0.262913	0.134264	11660871	0.77992	11.0243	0.240067	0.05052	0.075884	0.166321	0.307162	38	0.0240002
7	河北	秦皇岛	2023	1.75478	1.01425	1.72503	0.61391	1.68634	0.280353	0.134264	12127306	0.911531	11.0728	0.212162	0.0501384	0.102758	0.18898	0.404088	32	0.0242014
7	河北	秦皇岛	2024	1.82313	0.999251	1.82917	0.616684	1.62594	0.291433	0.134264	1.28283e+07	0.954066	11.1333	0.194831	0.0511345	0.0928495	0.174677	0.432195	55	0.0243834
8	河北	唐山	2006	1	1	0.437539	0.550116	1.14528	0.106534	0.174491	5961317	-0.669116	10.2014	0.139852	0.0110174	0.0294541	0.0767389	0.148665	27	0.0219878
8	河北	唐山	2007	1.00789	1.00789	0.455087	0.559522	1.20045	0.111179	0.174491	8362700	-0.582962	10.3912	0.164088	0.0116558	0.030636	0.0801648	0.18653	40	0.0220328
8	河北	唐山	2008	1.12938	1.12054	0.453767	0.536476	1.28654	0.11043	0.174491	11097028	-0.599049	10.5993	0.214331	0.0122373	0.0361545	0.0862278	0.206668	56	0.0219545
8	河北	唐山	2009	1.09892	0.97303	0.916952	0.600721	1.20797	0.170956	0.174491	18022689	-0.0914526	10.6557	0.131415	0.0127569	0.0366236	0.0901828	0.246211	45	0.0221429
8	河北	唐山	2010	1.12775	1.02624	0.859687	0.648507	1.24574	0.171004	0.174491	23409479	0.057297	10.7775	0.174895	0.0133484	0.0375861	0.0914762	0.176991	70	0.0220811
8	河北	唐山	2011	1.23745	1.09728	0.77263	0.650437	1.01616	0.155034	0.174491	24919095	-0.171168	10.9543	0.16119	0.0144527	0.042758	0.10147	0.249997	73	0.0221561
8	河北	唐山	2012	1.24486	1.00599	0.805745	0.648687	1.08103	0.160405	0.174491	30171685	-0.104375	11.0327	0.140314	0.0146802	0.0401239	0.10397	0.307652	49	0.022262
8	河北	唐山	2013	1.25956	1.0118	0.863385	0.647286	1.11404	0.167894	0.174491	35758674	-0.0416675	11.077	0.158954	0.0146402	0.036212	0.100713	0.221595	36	0.0223437
8	河北	唐山	2014	1.2892	1.02354	0.835704	0.632281	1.16068	0.163995	0.174491	41462408	-0.0791457	11.1024	0.202469	0.0144311	0.0395055	0.103166	0.290055	42	0.0224888
8	河北	唐山	2015	1.36367	1.05776	0.947729	0.64095	1.30069	0.181898	0.174491	45438766	0.137892	11.1077	0.169321	0.0145182	0.0502721	0.115726	0.2886	36	0.0226049
8	河北	唐山	2016	1.52166	1.11586	0.358909	0.600854	1.36397	0.109087	0.174491	49751053	-0.392223	11.197	0.12716	0.0150806	0.0513116	0.114689	0.216053	51	0.0229145
8	河北	唐山	2017	1.32114	0.86822	1.14173	0.595864	1.68384	0.20919	0.174491	53053688	0.412283	11.2501	0.113113	0.0160199	0.0477077	0.111989	0.299292	27	0.0230713
8	河北	唐山	2018	1.38375	1.04739	1.18134	0.590387	1.59375	0.210876	0.174491	56661340	0.356393	11.3117	0.0954878	0.0173004	0.0502939	0.118934	0.358265	38	0.0231649
8	河北	唐山	2019	1.44233	1.04234	1.37926	0.600199	1.35011	0.229163	0.174491	62384136	0.357324	11.4004	0.106608	0.0194353	0.048209	0.115749	0.374744	26	0.0232313
8	河北	唐山	2020	1.50987	1.04682	1.79118	0.620407	1.32206	0.27956	0.174491	65316192	0.713348	11.4407	0.142179	0.0224121	0.0583729	0.128994	0.286582	22	0.0230141
8	河北	唐山	2021	1.62705	1.07761	1.67975	0.652156	1.40623	0.272448	0.174491	69888328	0.801128	11.58	0.173071	0.0255965	0.0448031	0.111956	0.317161	46	0.0230173
8	河北	唐山	2022	1.7718	1.08896	1.58565	0.662717	1.42265	0.263048	0.174491	75619168	0.779155	11.6571	0.169162	0.027221	0.0442935	0.105261	0.309638	36	0.0230292
8	河北	唐山	2023	1.86881	1.09936	1.72503	0.695614	1.43907	0.283952	0.174491	78643936	1.008	11.6811	0.180258	0.0290174	0.0459969	0.109659	0.456152	28	0.023463
8	河北	唐山	2024	1.96583	1.10975	1.82917	0.718889	1.4141	0.298451	0.174491	8.39917e+07	1.14693	11.7717	0.148346	0.0299114	0.0451524	0.10293	0.489625	24	0.0236375
9	河北	沧州	2006	1	1	0.437539	0.447197	0.938092	0.0886173	0.187228	3081200	-1.1748	9.83102	0.0661095	0.00386444	0.0338029	0.0628844	0.215553	14	0.0223579
9	河北	沧州	2007	1.11982	1.11982	0.455087	0.427608	0.962752	0.0889335	0.187228	4323178	-1.21047	9.95935	0.0714601	0.00472073	0.0364233	0.0686343	0.194655	3	0.0225462
9	河北	沧州	2008	1.2405	1.10777	0.453767	0.363086	1.08768	0.08412	0.187228	5574564	-1.33973	10.1102	0.0771826	0.00538633	0.0397651	0.0728311	0.164714	9.66667	0.0226012
9	河北	沧州	2009	1.39955	1.12821	0.916952	0.402942	1.19834	0.14655	0.187228	7742848	-0.775438	10.1514	0.0513321	0.00611427	0.0515249	0.0874632	0.28702	16.3333	0.0227751
9	河北	沧州	2010	1.3749	0.982388	0.859687	0.441418	1.23251	0.145368	0.187228	10221649	-0.66122	10.3366	0.0515708	0.00649042	0.0553025	0.0967416	0.238933	23	0.0226445
9	河北	沧州	2011	1.15843	0.842557	0.77263	0.473208	1.30937	0.140952	0.187228	15303896	-0.560516	10.4914	0.0536604	0.00682711	0.0571953	0.102255	0.295042	34	0.0224556
9	河北	沧州	2012	1.15962	1.00103	0.805745	0.470186	1.31668	0.144683	0.187228	18918659	-0.540713	10.5731	0.0523762	0.00712547	0.0600878	0.110785	0.292971	14	0.0224711
9	河北	沧州	2013	1.22882	1.05967	0.863385	0.504246	1.60615	0.16312	0.187228	22921444	-0.166688	10.6369	0.0528265	0.00743739	0.0597851	0.116964	0.196077	23	0.0226952
9	河北	沧州	2014	1.21051	0.985103	0.835704	0.535952	1.60205	0.163617	0.187228	27289276	-0.0818944	10.6707	0.0608518	0.0110716	0.0611351	0.12168	0.295226	32	0.0227753
9	河北	沧州	2015	1.40149	1.15777	0.947729	0.557678	1.58935	0.179175	0.187228	31032564	0.0667204	10.7244	0.0516747	0.00759475	0.0824912	0.146005	0.359328	36	0.0231179
9	河北	沧州	2016	1.54898	1.10524	0.358909	0.57569	1.54127	0.110588	0.187228	34810735	-0.34702	10.7863	0.0536679	0.0106758	0.0802614	0.142438	0.325495	41	0.0232998
9	河北	沧州	2017	1.20727	0.779398	1.14173	0.60303	1.99315	0.218046	0.187228	37102513	0.665907	10.8581	0.0645234	0.0120493	0.0814651	0.144222	0.300746	58	0.023398
9	河北	沧州	2018	1.12423	0.931215	1.18134	0.585534	1.93974	0.21921	0.187228	39083788	0.596059	10.7121	0.0972339	0.0137583	0.109846	0.19047	0.363339	47	0.0243133
9	河北	沧州	2019	1.13912	1.01324	1.37926	0.576995	1.85071	0.239246	0.187228	41444448	0.648702	10.8041	0.103222	0.0155341	0.112224	0.191277	0.298942	42	0.0244352
9	河北	沧州	2020	1.16323	1.02117	1.79118	0.587911	1.9398	0.29153	0.187228	43185116	1.0597	10.833	0.0858001	0.0175359	0.124237	0.19867	0.429471	60	0.0244223
9	河北	沧州	2021	1.24218	1.06787	1.67975	0.594172	2.22999	0.286621	0.187228	45344372	1.21284	10.9508	0.090192	0.0198252	0.0886596	0.16063	0.35449	43	0.0242497
9	河北	沧州	2022	1.32816	1.06922	1.58565	0.573698	2.4266	0.278079	0.187228	49062612	1.21812	11.0019	0.111048	0.0223847	0.0894739	0.161758	0.270444	38	0.0241689
9	河北	沧州	2023	1.37914	1.10372	1.72503	0.592768	2.6232	0.301944	0.187228	52349808	1.53311	11.0206	0.105128	0.0254854	0.0874278	0.164617	0.312679	48	0.0245233
9	河北	沧州	2024	1.43012	1.13822	1.82917	0.5944	2.79163	0.318789	0.187228	5.55055e+07	1.74122	11.0874	0.11684	0.0289621	0.0904972	0.163928	0.312922	28	0.024653
10	天津	天津	2006	1	1	0.0726587	0.781841	0.841994	0.0839166	0.278196	16789800	-0.373248	10.4016	1.45489	0.0332465	0.0356316	0.153504	0.123522	34	0.0242309
10	天津	天津	2007	1.05686	1.05686	0.0760426	0.793955	0.8553	0.0861392	0.278196	21921700	-0.31941	10.5266	1.30836	0.0332825	0.0321977	0.162162	0.135168	44	0.0243763
10	天津	天津	2008	1.18398	1.12028	0.0761858	0.772453	0.897976	0.084631	0.278196	31751400	-0.361278	10.6935	1.07933	0.0328571	0.0370678	0.167436	0.132857	58	0.0244178
10	天津	天津	2009	1.39447	1.17778	0.0880707	0.803061	0.927622	0.0905382	0.278196	44465700	-0.225695	10.747	0.765041	0.0330576	0.0529448	0.196913	0.144266	29	0.024662
10	天津	天津	2010	1.50042	1.07598	0.074194	0.834832	0.938267	0.0930546	0.278196	58965200	-0.119442	10.87	0.814642	0.0330334	0.0450949	0.201566	0.16217	34	0.0248422
10	天津	天津	2011	1.50157	1.00077	0.0683181	0.880974	0.820933	0.094969	0.278196	70406800	-0.0528313	11.0103	0.823147	0.0335347	0.0420583	0.221426	0.156272	48	0.0250219
10	天津	天津	2012	1.61279	1.07407	0.0688853	0.883937	0.780857	0.0943639	0.278196	79132600	-0.0719501	11.0917	0.807111	0.0343324	0.0423742	0.237002	0.164683	30	0.0251014
10	天津	天津	2013	1.68168	1.04272	0.0671318	0.857556	0.900628	0.0940249	0.278196	91030100	-0.0748285	11.1639	0.800366	0.0347447	0.0472719	0.256319	0.173902	45	0.0252574
10	天津	天津	2014	1.70981	1.01673	0.0645381	0.906365	0.95872	0.101179	0.278196	104900000	0.133301	11.218	0.773076	0.0353954	0.0464588	0.271103	0.166613	43	0.0253639
10	天津	天津	2015	1.76894	1.03459	0.0723432	0.902563	1.22539	0.108517	0.278196	118100000	0.323638	11.2333	0.654624	0.0356428	0.0519545	0.297104	0.178487	35	0.025575
10	天津	天津	2016	1.92661	1.08913	0.0932966	0.942379	1.50483	0.123066	0.278196	127600000	0.682529	11.284	0.594078	0.0356064	0.0850316	0.322327	0.188449	50	0.0259007
10	天津	天津	2017	2.03536	1.05645	0.0903465	1.012	1.82173	0.139398	0.278196	112700000	1.15331	11.3885	0.612494	0.0365035	0.0780832	0.263646	0.187349	37	0.0260628
10	天津	天津	2018	2.12071	1.04194	0.0919339	1.08789	1.61866	0.143616	0.278196	106400000	1.26381	11.4786	0.606687	0.037838	0.0746035	0.232222	0.178892	71	0.0261192
10	天津	天津	2019	2.23037	1.05171	0.122833	1.13597	1.52727	0.150779	0.278196	120400000	1.38373	11.5277	0.523418	0.0389458	0.0814841	0.252976	0.194536	56	0.0262164
10	天津	天津	2020	2.35909	1.05772	0.180448	1.14083	1.67928	0.162101	0.278196	124000000	1.556	11.5229	0.521611	0.0412593	0.0876813	0.224968	0.217827	49	0.0261933
10	天津	天津	2021	3.0671	1.30012	0.163538	1.15396	1.90758	0.167597	0.278196	129900000	1.75738	11.6461	0.533371	0.0424909	0.0644873	0.20099	0.210587	59	0.0260443
10	天津	天津	2022	4.39225	1.43205	0.159387	1.05866	2.04784	0.159085	0.278196	117000000	1.53202	11.6815	0.518669	0.043617	0.0547439	0.169216	0.254254	66	0.025953
10	天津	天津	2023	4.96013	1.52958	0.170242	1.00543	2.1881	0.157485	0.278196	97830880	1.46186	11.7176	0.479492	0.043739	0.0748573	0.195994	0.411853	74	0.0261047
10	天津	天津	2024	5.52802	1.62711	0.179328	0.990772	2.32859	0.160393	0.278196	9.67726e+07	1.52255	11.7916	0.450259	0.0443842	0.0824996	0.200879	0.494317	35	0.0262368
11	山东	青岛	2006	1	1	0.158556	0.794348	0.738735	0.0929253	0.181349	14856900	-0.342777	10.5057	0.961999	0.0313881	0.00356506	0.078164	0.245629	18	0.0238097
11	山东	青岛	2007	1.15341	1.15341	0.147461	0.795833	0.760398	0.0923552	0.181349	16353600	-0.329935	10.652	0.935197	0.0315878	0.00800456	0.0905886	0.179184	22	0.0239744
11	山东	青岛	2008	1.25875	1.09133	0.163985	0.791556	0.828108	0.0955316	0.181349	20190100	-0.282077	10.7992	0.874593	0.0318485	0.00651149	0.0891883	0.283069	58	0.0241357
11	山东	青岛	2009	1.40056	1.11267	0.177746	0.773334	0.931434	0.0975972	0.181349	24588900	-0.257629	10.8845	0.662674	0.0323703	0.0124762	0.0956239	0.284805	24	0.0243088
11	山东	青岛	2010	1.52128	1.08619	0.172236	0.768516	0.876899	0.0949508	0.181349	30224800	-0.318626	11.0251	0.710382	0.0326775	0.0149103	0.0994995	0.241537	29	0.0243846
11	山东	青岛	2011	1.59319	1.04727	0.173339	0.804277	0.859458	0.0989991	0.181349	35025400	-0.208336	11.1597	0.736618	0.0327623	0.0147108	0.105315	0.289221	50	0.0245568
11	山东	青岛	2012	1.65669	1.03986	0.178679	0.842252	0.75638	0.101608	0.181349	41539100	-0.150739	11.2393	0.672708	0.0328438	0.0139455	0.111503	0.285691	60	0.0247275
11	山东	青岛	2013	1.72441	1.04088	0.18972	0.807758	0.826177	0.1005	0.181349	50278600	-0.208843	11.3121	0.642622	0.0327101	0.0300052	0.135074	0.293404	41	0.0248192
11	山东	青岛	2014	1.8704	1.08466	0.33732	0.854863	1.0744	0.130092	0.181349	57660300	0.246457	11.3725	0.604308	0.0335459	0.0220992	0.132343	0.302348	39	0.0249851
11	山东	青岛	2015	1.85462	0.991564	0.184242	0.859477	1.15703	0.114707	0.181349	65556700	0.209124	11.4259	0.505134	0.034116	0.0250099	0.141232	0.300816	48	0.0251311
11	山东	青岛	2016	2.36537	1.27539	0.345538	0.848973	1.1	0.131004	0.181349	74547000	0.251406	11.4783	0.469247	0.0354709	0.0272343	0.145732	0.228091	87	0.0253598
11	山东	青岛	2017	1.96104	0.829065	0.28989	0.92195	1.06637	0.132477	0.181349	77770900	0.434681	11.5553	0.49371	0.0356359	0.0242469	0.138408	0.301822	46	0.0254773
11	山东	青岛	2018	2.24177	1.14315	0.188299	0.978239	0.990085	0.125385	0.181349	83914800	0.494937	11.6224	0.486262	0.0405525	0.0299442	0.142454	0.250575	49	0.0256097
11	山东	青岛	2019	2.4891	1.11033	0.283425	1.00283	1.70745	0.158133	0.181349	102000000	1.18148	11.6812	0.504845	0.0419051	0.0284662	0.134224	0.464849	34	0.0257392
11	山东	青岛	2020	2.6248	1.05452	0.333077	1.01963	1.96263	0.172635	0.181349	105300000	1.46509	11.7176	0.515559	0.0426166	0.0266762	0.127789	0.297364	36	0.0257806
11	山东	青岛	2021	2.95897	1.12731	0.320093	1.07743	2.10162	0.181747	0.181349	109600000	1.75613	11.8338	0.59983	0.0445758	0.0239423	0.120735	0.322855	51	0.0258369
11	山东	青岛	2022	3.47472	1.1743	0.329385	1.07773	2.13999	0.183871	0.181349	114600000	1.79252	11.8826	0.570786	0.0456658	0.0282503	0.113317	0.382617	63	0.0259409
11	山东	青岛	2023	3.78296	1.18209	0.364546	1.12098	2.17837	0.194298	0.181349	120300000	1.99523	11.9314	0.557324	0.0475907	0.0241708	0.109059	0.455903	38	0.0260319
11	山东	青岛	2024	4.0912	1.18988	0.400884	1.15215	2.60577	0.213424	0.181349	1.29541e+08	2.44559	11.9836	0.542883	0.0487711	0.022798	0.102899	0.543181	40	0.0259779
12	山东	东营	2006	1	1	0.158556	0.678048	0.48527	0.0721798	0.219948	5375600	-0.928528	10.8884	0.142137	0.0226572	0.0130537	0.0586701	0.171777	22	0.0215072
12	山东	东营	2007	1.12923	1.12923	0.147461	0.709248	0.506673	0.0752326	0.219948	6122300	-0.814187	10.9831	0.172079	0.0234562	0.0137878	0.0650849	0.23539	46	0.0215742
12	山东	东营	2008	1.34059	1.18717	0.163985	0.673783	0.489505	0.0724095	0.219948	7576100	-0.935932	11.1727	0.200526	0.0250329	0.0131553	0.0628876	0.212749	58	0.0217816
12	山东	东营	2009	1.32462	0.988085	0.177746	0.691298	0.54545	0.0776177	0.219948	9886100	-0.824274	11.1774	0.187534	0.0255516	0.0169071	0.0729673	0.172301	30	0.0220013
12	山东	东营	2010	1.40111	1.05774	0.172236	0.732636	0.498492	0.0808044	0.219948	11851200	-0.721701	11.2962	0.330534	0.0259402	0.0226182	0.0866219	0.242646	60	0.0220582
12	山东	东营	2011	1.38104	0.985677	0.173339	0.730534	0.489129	0.0804363	0.219948	15744200	-0.735006	11.4056	0.356162	0.0248197	0.0240315	0.0970318	0.297849	74	0.0221831
12	山东	东营	2012	1.46478	1.06064	0.178679	0.74435	0.50365	0.0831293	0.219948	19630000	-0.672979	11.5061	0.375516	0.0127526	0.0240314	0.100782	0.345319	95	0.0222719
12	山东	东营	2013	1.46186	0.998008	0.18972	0.749159	0.393218	0.0821713	0.219948	23321300	-0.730072	11.5823	0.363163	0.0123485	0.0216097	0.103581	0.259128	71	0.0223821
12	山东	东营	2014	1.47279	1.00748	0.33732	0.786863	0.593827	0.109386	0.219948	27082000	-0.342213	11.6299	0.343472	0.0129033	0.0148141	0.101805	0.339979	43	0.0224669
12	山东	东营	2015	1.48277	1.00677	0.184242	0.824306	0.651531	0.0973682	0.219948	30846800	-0.285659	11.6342	0.335539	0.0141399	0.0156687	0.107492	0.295116	29	0.0226588
12	山东	东营	2016	1.4023	0.945732	0.345538	0.886961	0.634948	0.123644	0.219948	24725500	0.0369461	11.6387	0.412312	0.0152306	0.0190515	0.110386	0.311973	43	0.0228519
12	山东	东营	2017	1.42874	1.01886	0.28989	0.955735	0.757143	0.128625	0.219948	25574500	0.321256	11.7118	0.496131	0.0151769	0.0169973	0.10537	0.409434	46	0.0230224
12	山东	东营	2018	1.70966	1.19662	0.188299	0.953658	0.691497	0.114678	0.219948	23017050	0.189652	11.7601	0.585393	0.0143343	0.0221594	0.109988	0.364898	52	0.0231049
12	山东	东营	2019	1.30544	0.763563	0.283425	0.836757	0.716704	0.112285	0.219948	15513492	-0.120701	11.804	0.559198	0.0154214	0.020949	0.104998	0.453841	41	0.0232564
12	山东	东营	2020	1.34791	1.03254	0.333077	0.81139	0.62358	0.112648	0.219948	16894192	-0.239406	11.8015	0.458284	0.016667	0.0211825	0.106364	0.298314	38	0.0234099
12	山东	东营	2021	1.50474	1.11635	0.320093	0.745481	0.6554	0.103885	0.219948	19005966	-0.451095	11.9526	0.601776	0.0187895	0.0115332	0.08838	0.366163	63	0.0231871
12	山东	东营	2022	1.75903	1.16899	0.329385	0.703664	0.655422	0.0998757	0.219948	21362706	-0.587246	12.0238	0.721288	0.0206415	0.0282456	0.100347	0.462466	61	0.0232223
12	山东	东营	2023	1.77137	1.16208	0.364546	0.70277	0.655444	0.10392	0.219948	23071722	-0.564029	12.0825	0.643353	0.0226056	0.0249041	0.0979027	0.701694	65	0.0232975
12	山东	东营	2024	1.78371	1.15518	0.400884	0.6618	0.649887	0.103064	0.219948	2.34962e+07	-0.681217	12.1811	0.619942	0.0231876	0.030081	0.100223	0.829233	36	0.0231417
13	山东	烟台	2006	1	1	0.158556	0.695384	0.865522	0.0841088	0.106225	10393700	-0.587549	10.4504	0.499583	0.0150505	0.0129969	0.0597274	0.237049	17	0.0221604
13	山东	烟台	2007	1.1972	1.1972	0.147461	0.662171	0.86413	0.0787056	0.106225	13272700	-0.71053	10.6256	0.632206	0.0166735	0.0116936	0.0605897	0.175365	23	0.022277
13	山东	烟台	2008	1.36515	1.14028	0.163985	0.613061	1.03354	0.07903	0.106225	16312600	-0.740776	10.7908	0.713635	0.0173112	0.0124418	0.0613774	0.242408	23	0.0223693
13	山东	烟台	2009	1.48049	1.08449	0.177746	0.629856	1.12557	0.0850814	0.106225	18525500	-0.604855	10.8639	0.63734	0.0192677	0.0160289	0.0674805	0.182109	22	0.0225893
13	山东	烟台	2010	1.55838	1.05261	0.172236	0.624646	1.1325	0.083973	0.106225	21936200	-0.621665	10.9792	0.725332	0.0210089	0.0210625	0.0792551	0.267491	27	0.0227685
13	山东	烟台	2011	1.50639	0.966639	0.173339	0.676711	1.0417	0.0881198	0.106225	28838000	-0.509919	11.1012	0.6338	0.0209962	0.0225781	0.0881857	0.260146	65	0.0230576
13	山东	烟台	2012	1.59628	1.05967	0.178679	0.658347	0.733412	0.0785529	0.106225	30439200	-0.797123	11.1808	0.60238	0.0224077	0.0238579	0.0951965	0.205471	43	0.0233068
13	山东	烟台	2013	1.58157	0.990783	0.18972	0.653973	0.873605	0.08294	0.106225	35381900	-0.700006	11.2435	0.568538	0.023842	0.0195777	0.10148	0.269703	38	0.0235004
13	山东	烟台	2014	1.65168	1.04433	0.33732	0.656222	0.832186	0.0995791	0.106225	41010600	-0.612752	11.3081	0.567959	0.0247337	0.0148453	0.100758	0.2651	18	0.0237115
13	山东	烟台	2015	1.78468	1.08052	0.184242	0.632909	0.873181	0.0797092	0.106225	46671400	-0.7765	11.3711	0.505382	0.0260374	0.0165734	0.105731	0.289548	37	0.0239289
13	山东	烟台	2016	1.93576	1.08466	0.345538	0.632601	0.739458	0.095272	0.106225	52972200	-0.756135	11.4229	0.452263	0.0324618	0.0158224	0.105216	0.344724	34	0.0240645
13	山东	烟台	2017	1.32955	0.686834	0.28989	0.656416	0.672465	0.0898796	0.106225	55942400	-0.765817	11.4656	0.455432	0.0327533	0.0159333	0.104712	0.318856	23	0.0241211
13	山东	烟台	2018	1.41868	1.06704	0.188299	0.677016	0.903013	0.0863456	0.106225	59298944	-0.600427	11.5217	0.425365	0.0329571	0.0166145	0.105226	0.239885	38	0.0242986
13	山东	烟台	2019	1.59189	1.12209	0.283425	0.643455	1.33265	0.104567	0.106225	62263892	-0.326007	11.5826	0.379744	0.0331191	0.0234044	0.101202	0.2695	39	0.0243995
13	山东	烟台	2020	1.64644	1.03427	0.333077	0.669259	1.61424	0.120849	0.106225	64069544	0.00795219	11.5959	0.416087	0.0351318	0.0304871	0.109527	0.343176	40	0.0244718
13	山东	烟台	2021	1.69932	1.03212	0.320093	0.678663	1.67075	0.121922	0.106225	64197684	0.0722967	11.7199	0.471523	0.0378294	0.0179404	0.0921665	0.355319	39	0.02443
13	山东	烟台	2022	1.75613	1.03343	0.329385	0.65156	1.64661	0.119086	0.106225	69654488	-0.0313956	11.8109	0.482669	0.0393609	0.0302925	0.0971132	0.401544	59	0.0243404
13	山东	烟台	2023	1.84049	1.02503	0.364546	0.686439	1.62247	0.126877	0.106225	73137216	0.0963545	11.8811	0.450479	0.0427223	0.0274403	0.0937499	0.49656	82	0.02442
13	山东	烟台	2024	1.92486	1.01662	0.400884	0.688935	1.84734	0.137276	0.106225	7.62967e+07	0.298593	11.94	0.43805	0.0447941	0.0283961	0.0932028	0.575904	118	0.0244734
14	山东	潍坊	2006	1	1	0.158556	0.723738	0.709899	0.0835567	0.374895	6928800	-0.605781	9.80158	0.260843	0.0106987	0.0166461	0.0725156	0.239927	18	0.021959
14	山东	潍坊	2007	1.17201	1.17201	0.147461	0.749348	0.731069	0.0859206	0.374895	9040400	-0.510743	9.96107	0.264242	0.0119139	0.0204129	0.0794808	0.199922	39	0.0221602
14	山东	潍坊	2008	1.32551	1.13097	0.163985	0.734642	0.748849	0.0865348	0.374895	11918700	-0.53556	10.1306	0.260625	0.0126096	0.0225698	0.0816722	0.259784	64	0.022191
14	山东	潍坊	2009	1.45435	1.0972	0.177746	0.745768	0.696114	0.0881583	0.374895	14035600	-0.52627	10.2139	0.224541	0.0134352	0.0285702	0.0932552	0.322146	51	0.0223652
14	山东	潍坊	2010	1.52405	1.04792	0.172236	0.766418	0.690423	0.0898829	0.374895	17517100	-0.46393	10.3431	0.281852	0.0125242	0.0313925	0.103114	0.21328	53	0.022507
14	山东	潍坊	2011	1.5548	1.02018	0.173339	0.79111	0.738841	0.0942785	0.374895	26031700	-0.342738	10.4681	0.282547	0.0130849	0.0324	0.111245	0.288187	47	0.0226415
14	山东	潍坊	2012	1.65444	1.06409	0.178679	0.795861	0.575975	0.0912873	0.374895	30129300	-0.443125	10.5904	0.257966	0.0130302	0.0326098	0.116167	0.296129	43	0.0229197
14	山东	潍坊	2013	1.72188	1.04076	0.18972	0.770562	0.704532	0.0928182	0.374895	34299500	-0.426239	10.6979	0.245104	0.0136349	0.026951	0.120973	0.273539	51	0.0232325
14	山东	潍坊	2014	1.68881	0.980792	0.33732	0.803883	0.696843	0.114123	0.374895	39690800	-0.207663	10.7768	0.246675	0.0153286	0.0220305	0.119153	0.356822	44	0.0234179
14	山东	潍坊	2015	1.86626	1.10507	0.184242	0.744469	0.604065	0.0863918	0.374895	45167000	-0.594042	10.8259	0.252508	0.0168912	0.0273506	0.131162	0.275323	48	0.0235824
14	山东	潍坊	2016	1.58567	0.849651	0.345538	0.687683	0.551951	0.0971618	0.374895	51125300	-0.706515	10.9025	0.246031	0.0228092	0.0228379	0.125459	0.284363	43	0.0237713
14	山东	潍坊	2017	1.487	0.937778	0.28989	0.705116	0.530891	0.0921751	0.374895	48554900	-0.704015	10.9439	0.27369	0.0230358	0.0262768	0.127991	0.25318	21	0.0239169
14	山东	潍坊	2018	1.51651	1.01984	0.188299	0.729434	0.511481	0.0826457	0.374895	50691316	-0.711042	10.979	0.296331	0.0197078	0.0297861	0.133468	0.409415	26	0.0240219
14	山东	潍坊	2019	1.57038	1.03552	0.283425	0.745464	0.64957	0.0994019	0.374895	38930932	-0.482858	11.0158	0.314072	0.0219346	0.036362	0.13675	0.375536	48	0.0241533
14	山东	潍坊	2020	1.57608	1.00363	0.333077	0.750627	0.669086	0.106401	0.374895	40682824	-0.413647	11.0464	0.322079	0.0233152	0.0377191	0.135129	0.321518	12	0.0242014
14	山东	潍坊	2021	1.86657	1.18431	0.320093	0.792196	0.800041	0.113324	0.374895	47192076	-0.184086	11.2196	0.379677	0.0263648	0.0317999	0.125501	0.274341	40	0.0240706
14	山东	潍坊	2022	2.19568	1.17632	0.329385	0.811716	0.900249	0.119391	0.374895	53185468	-0.0361201	11.2582	0.473757	0.0278698	0.0321178	0.115407	0.233721	70	0.0240916
14	山东	潍坊	2023	2.36547	1.21544	0.364546	0.809758	1.00046	0.12589	0.374895	53610952	0.0576622	11.3044	0.448595	0.0310295	0.0369527	0.116931	0.246133	30	0.0241668
14	山东	潍坊	2024	2.53526	1.25456	0.400884	0.827008	1.14699	0.13607	0.374895	5.47689e+07	0.252366	11.3853	0.436744	0.0362772	0.0344256	0.109957	0.223082	41	0.0240561
15	山东	威海	2006	1	1	0.158556	0.659402	0.562077	0.0718841	0.126991	5741100	-0.93545	10.5052	0.744777	0.0130638	0.0178449	0.0866835	0.188632	26	0.0223748
15	山东	威海	2007	1.23974	1.23974	0.147461	0.709498	0.668469	0.0794378	0.126991	6253000	-0.69349	10.6379	0.699073	0.0172857	0.0182893	0.0885671	0.231824	35	0.0225698
15	山东	威海	2008	1.34038	1.08118	0.163985	0.691115	0.719958	0.0804727	0.126991	7724100	-0.705922	10.7347	0.636226	0.0213984	0.0221612	0.0948481	0.278216	49	0.0227937
15	山东	威海	2009	1.31611	0.98189	0.177746	0.690214	0.772475	0.083343	0.126991	10460300	-0.65983	10.8232	0.512999	0.021666	0.0243333	0.0968761	0.252114	31	0.0228293
15	山东	威海	2010	1.32401	1.006	0.172236	0.699639	0.868905	0.0863315	0.126991	10591800	-0.560265	10.9331	0.599347	0.0232637	0.0316132	0.106911	0.26051	34	0.0228566
15	山东	威海	2011	1.08656	0.820659	0.173339	0.689804	0.569779	0.0775423	0.126991	13416000	-0.814659	11.0201	0.63761	0.0212028	0.0374217	0.117013	0.2416	64	0.0228223
15	山东	威海	2012	1.37503	1.26549	0.178679	0.670865	0.579388	0.0761077	0.126991	15954500	-0.868368	11.1181	0.571408	0.0215769	0.0454374	0.12916	0.315199	48	0.0229608
15	山东	威海	2013	1.4373	1.04529	0.18972	0.652438	0.739428	0.0792904	0.126991	19237100	-0.804645	11.1922	0.520369	0.0217796	0.0336905	0.129338	0.352868	43	0.0231267
15	山东	威海	2014	1.39558	0.970972	0.33732	0.656309	0.731251	0.0969853	0.126991	22293700	-0.687217	11.2883	0.45404	0.0229026	0.0266495	0.125036	0.213734	45	0.0233753
15	山东	威海	2015	1.50229	1.07647	0.184242	0.665534	0.699557	0.0792142	0.126991	25437200	-0.793451	11.3531	0.43814	0.0306018	0.0368107	0.140535	0.285174	38	0.023514
15	山东	威海	2016	1.54694	1.02972	0.345538	0.632343	0.618665	0.0921237	0.126991	28793500	-0.84649	11.4345	0.452816	0.030315	0.0299641	0.1299	0.306979	44	0.0236122
15	山东	威海	2017	1.58251	1.02299	0.28989	0.672026	0.600438	0.0899278	0.126991	29418900	-0.765744	11.4878	0.499553	0.0315904	0.030942	0.128644	0.348913	39	0.0237642
15	山东	威海	2018	1.62855	1.02909	0.188299	0.697957	0.486217	0.078149	0.126991	31625318	-0.837479	11.5209	0.480884	0.0340438	0.0273864	0.1255	0.36853	71	0.0239026
15	山东	威海	2019	1.5959	0.979952	0.283425	0.690438	0.501906	0.0888707	0.126991	26881520	-0.780546	11.5385	0.473714	0.036298	0.0314853	0.115789	0.394762	52	0.0240158
15	山东	威海	2020	1.55416	0.973851	0.333077	0.731356	0.456719	0.0985672	0.126991	27661084	-0.636897	11.5377	0.539653	0.0387361	0.032852	0.117436	0.303909	46	0.0241417
15	山东	威海	2021	1.68969	1.0872	0.320093	0.786045	0.487805	0.104516	0.126991	29320750	-0.436409	11.6551	0.6041	0.0432437	0.0228049	0.102239	0.428033	36	0.0240387
15	山东	威海	2022	1.83428	1.08557	0.329385	0.80524	0.495718	0.108162	0.126991	23779128	-0.357919	11.6678	0.619975	0.0465423	0.0564019	0.122513	0.272783	55	0.0241463
15	山东	威海	2023	1.88571	1.09969	0.364546	0.824642	0.503631	0.114889	0.126991	24801630	-0.259397	11.7002	0.573312	0.0492635	0.0549478	0.12251	0.273568	50	0.0241115
15	山东	威海	2024	1.93714	1.1138	0.400884	0.852974	0.50791	0.122752	0.126991	2.37748e+07	-0.132128	11.7592	0.547165	0.049826	0.0620739	0.129056	0.267529	65	0.024436
16	山东	日照	2006	1	1	0.158556	1.01197	0.904309	0.123779	0.410109	2350865	0.524635	9.76411	0.661982	0.0203336	0.0252606	0.0692969	0.196184	14	0.0225856
16	山东	日照	2007	1.03296	1.03296	0.147461	0.937362	1.10198	0.118456	0.410109	3511346	0.407426	9.9744	0.749093	0.0234364	0.0297658	0.0793363	0.267466	45	0.0228537
16	山东	日照	2008	1.04206	1.0088	0.163985	0.870759	1.22535	0.115456	0.410109	5184311	0.28321	10.1584	0.90991	0.0225813	0.0293302	0.0806933	0.223835	58	0.0227297
16	山东	日照	2009	1.05456	1.012	0.177746	0.895017	1.16615	0.118516	0.410109	6318569	0.332659	10.2568	0.745622	0.0228754	0.0374007	0.0927813	0.2518	37	0.0227315
16	山东	日照	2010	1.07493	1.01931	0.172236	0.957757	1.35463	0.130392	0.410109	7753559	0.682861	10.3871	0.995929	0.0207499	0.0431318	0.104296	0.29707	39	0.0228027
16	山东	日照	2011	1.03965	0.967181	0.173339	0.859891	1.26508	0.116258	0.410109	8806891	0.28243	10.5393	1.26402	0.0204197	0.0524549	0.116792	0.32741	39	0.0229436
16	山东	日照	2012	1.03434	0.994896	0.178679	0.7722	1.258	0.105995	0.410109	9223776	-0.018928	10.6292	1.36326	0.0226317	0.0505187	0.117849	0.316381	30	0.0231119
16	山东	日照	2013	0.936024	0.904946	0.18972	0.732022	1.06973	0.0975337	0.410109	10690473	-0.287635	10.7188	1.58829	0.0221768	0.0451352	0.122829	0.258665	19	0.0232075
16	山东	日照	2014	0.96876	1.03497	0.33732	0.828578	0.868809	0.121576	0.410109	12347482	0.00422248	10.785	1.54073	0.0228814	0.0408999	0.121026	0.387003	33	0.0233632
16	山东	日照	2015	0.975817	1.00728	0.184242	1.06365	0.847847	0.131668	0.410109	14078065	0.678838	10.7889	0.677352	0.0219906	0.0456497	0.132776	0.230657	32	0.0235066
16	山东	日照	2016	1.00672	1.03167	0.345538	1.06641	0.603472	0.14475	0.410109	15977773	0.627746	10.8612	0.545686	0.0233539	0.0504792	0.135623	0.352573	37	0.0236634
16	山东	日照	2017	0.97341	0.966912	0.28989	0.967517	0.508182	0.12364	0.410109	16911876	0.177174	10.9596	0.539263	0.023916	0.0542319	0.138504	0.347561	50	0.0237715
16	山东	日照	2018	1.00905	1.03661	0.188299	0.933116	0.893026	0.117369	0.410109	17977324	0.268622	11.0201	0.50253	0.022827	0.0557428	0.145	0.297529	45	0.0238326
16	山东	日照	2019	0.965792	0.957129	0.283425	0.933225	0.785757	0.12585	0.410109	15011066	0.260589	11.099	0.540473	0.0244083	0.0497975	0.137196	0.322809	30	0.0240113
16	山东	日照	2020	1.00039	1.03582	0.333077	0.95182	0.715488	0.132173	0.410109	15491420	0.30926	11.1151	0.511152	0.02756	0.0552372	0.14356	0.349314	15	0.0240989
16	山东	日照	2021	1.02818	1.02779	0.320093	1.01949	0.691703	0.13829	0.410109	15956163	0.513522	11.2177	0.523393	0.0300182	0.037567	0.122327	0.308177	42	0.0241956
16	山东	日照	2022	1.06098	1.0319	0.329385	1.02647	0.637628	0.138845	0.410109	16450804	0.504299	11.2582	0.611849	0.0314166	0.0450153	0.125658	0.372818	47	0.0242503
16	山东	日照	2023	1.07397	1.03072	0.364546	1.01456	0.583554	0.140149	0.410109	16681115	0.449765	11.3034	0.577448	0.0327749	0.0522026	0.133904	0.530469	45	0.0242645
16	山东	日照	2024	1.08695	1.02954	0.400884	1.03209	0.536196	0.14536	0.410109	1.64876e+07	0.501814	11.3771	0.500204	0.034526	0.0446988	0.124546	0.602816	39	0.0239829
17	山东	滨州	2006	1	1	0.158556	0.952189	0.539432	0.107062	0.299816	6000000	0.0497758	9.99101	0.270018	0.0106634	0.0245029	0.0810512	0.222866	35	0.0211659
17	山东	滨州	2007	1.13834	1.13834	0.147461	0.976647	0.585528	0.109929	0.299816	6050000	0.159335	10.1977	0.259178	0.0115777	0.0259464	0.0861968	0.208003	17	0.021379
17	山东	滨州	2008	1.21685	1.06897	0.163985	0.932799	0.605906	0.10705	0.299816	5786900	0.0367102	10.3486	0.273172	0.012453	0.0266766	0.0877965	0.276921	34	0.0216283
17	山东	滨州	2009	1.33806	1.09961	0.177746	0.922373	0.611471	0.107546	0.299816	7234100	0.0154281	10.441	0.18155	0.0130039	0.0352368	0.0985288	0.283365	30	0.0219629
17	山东	滨州	2010	1.39157	1.03999	0.172236	0.96171	0.768737	0.115758	0.299816	8861200	0.262423	10.5521	0.240044	0.0128057	0.0403075	0.112755	0.274321	39	0.0220966
17	山东	滨州	2011	1.48412	1.06651	0.173339	0.959379	0.70574	0.113978	0.299816	10106900	0.208608	10.6901	0.260966	0.0123413	0.0425183	0.121478	0.290724	52	0.0221678
17	山东	滨州	2012	1.60655	1.08249	0.178679	0.880699	0.698197	0.104803	0.299816	12627300	-0.0622578	10.7781	0.218087	0.0121522	0.0418972	0.1247	0.286088	46	0.0223664
17	山东	滨州	2013	1.54152	0.959522	0.18972	0.866364	0.629612	0.102587	0.299816	15171800	-0.153869	10.8652	0.257782	0.0122507	0.0409828	0.126392	0.317116	39	0.0225947
17	山东	滨州	2014	1.42074	0.92165	0.33732	0.880452	0.721524	0.124112	0.299816	17488600	0.0726594	10.925	0.207347	0.0128782	0.0387468	0.126493	0.348984	20	0.0227456
17	山东	滨州	2015	1.32987	0.936042	0.184242	0.877854	0.64527	0.103747	0.299816	19902400	-0.107041	10.975	0.224942	0.0134159	0.0466656	0.137256	0.359116	26	0.022991
17	山东	滨州	2016	1.31244	0.986892	0.345538	0.878487	0.599923	0.121705	0.299816	21565700	-0.0179991	11.0185	0.243814	0.0137669	0.0423594	0.13506	0.252038	47	0.0230599
17	山东	滨州	2017	0.877196	0.668371	0.28989	0.896327	0.572421	0.116602	0.299816	21879100	-0.0188768	11.0494	0.271778	0.0139731	0.0422559	0.134201	0.321809	47	0.023177
17	山东	滨州	2018	0.902019	1.0283	0.188299	0.905815	0.38724	0.100984	0.299816	18203412	-0.199441	11.0665	0.327043	0.0139138	0.0417459	0.137578	0.390166	32	0.0234148
17	山东	滨州	2019	0.969315	1.07461	0.283425	0.905187	0.877652	0.124796	0.299816	13925610	0.232701	11.0451	0.355684	0.0143541	0.0551777	0.154056	0.424403	33	0.0238896
17	山东	滨州	2020	0.973844	1.00467	0.333077	0.845917	0.402514	0.111162	0.299816	15011808	-0.284987	11.0673	0.323911	0.0144378	0.077357	0.177789	0.291459	23	0.0240095
17	山东	滨州	2021	1.07901	1.108	0.320093	0.814507	0.632414	0.111724	0.299816	17308614	-0.231891	11.1993	0.357798	0.0146732	0.0664576	0.166491	0.33374	34	0.0238327
17	山东	滨州	2022	1.19086	1.10365	0.329385	0.794846	0.868473	0.11651	0.299816	19749128	-0.117391	11.2446	0.413455	0.0157521	0.0686333	0.160631	0.413063	34	0.0237214
17	山东	滨州	2023	1.26307	1.12249	0.364546	0.82075	1.10453	0.129918	0.299816	21210564	0.172366	11.2884	0.382763	0.0168259	0.0753394	0.169007	0.651269	25	0.0238859
17	山东	滨州	2024	1.33528	1.14133	0.400884	0.80518	1.53338	0.143373	0.299816	2.21056e+07	0.463863	11.3837	2.71231	0.0178935	0.0773334	0.167478	0.746866	39	0.0236144
18	江苏	连云港	2006	1	1	2.11528	0.643931	1.17419	0.316898	0.264294	3001200	0.926389	9.48878	0.363396	0.00623724	0.039787	0.0968463	0.189731	22	0.0217462
18	江苏	连云港	2007	1.06437	1.06437	1.77711	0.631347	1.19912	0.276062	0.264294	4095600	0.649226	9.66008	0.352957	0.00686832	0.0454753	0.115094	0.237281	22	0.0218383
18	江苏	连云港	2008	1.12656	1.05843	1.90112	0.615542	1.24795	0.290038	0.264294	5681700	0.723917	9.82783	0.373969	0.0062169	0.0486813	0.12882	0.225778	35	0.0219741
18	江苏	连云港	2009	1.30959	1.16247	1.86261	0.678355	1.25258	0.293282	0.264294	7455900	0.913551	9.96063	0.280038	0.00760148	0.0532073	0.149012	0.192092	29	0.0220929
18	江苏	连云港	2010	1.3897	1.06118	1.68532	0.760777	1.20035	0.281061	0.264294	9208200	1.02452	10.2158	0.285928	0.00784608	0.0510572	0.168707	0.332221	38	0.0223604
18	江苏	连云港	2011	1.34236	0.965932	1.57878	0.739246	1.26558	0.267532	0.264294	10431900	0.919586	10.3746	0.315773	0.00769493	0.0669931	0.194588	0.276302	46	0.0224717
18	江苏	连云港	2012	1.44108	1.07354	1.5912	0.795777	1.33361	0.277658	0.264294	12808800	1.17271	10.5053	0.312031	0.00762291	0.0640062	0.193081	0.308375	39	0.0224915
18	江苏	连云港	2013	1.34973	0.936612	1.72637	0.817719	1.19111	0.292627	0.264294	13501200	1.24321	10.6216	0.224873	0.00843087	0.0705725	0.198126	0.32366	29	0.0227575
18	江苏	连云港	2014	1.30825	0.969265	2.03698	0.836273	1.15797	0.330725	0.264294	17165700	1.51414	10.6983	0.248221	0.00848987	0.057458	0.189187	0.339429	26	0.0227844
18	江苏	连云港	2015	1.46241	1.11784	1.7416	0.83687	1.30314	0.299656	0.264294	20773500	1.40311	10.8411	0.217377	0.00857523	0.0581983	0.184777	0.339559	33	0.0230398
18	江苏	连云港	2016	1.54703	1.05786	1.81602	0.81817	1.3423	0.307172	0.264294	23851600	1.4237	10.9309	0.184358	0.00850351	0.0637298	0.147101	0.306991	57	0.023146
18	江苏	连云港	2017	1.51919	0.982001	1.51755	0.834046	1.59506	0.28038	0.264294	26036300	1.44233	11.0187	0.199165	0.00874176	0.0631033	0.140263	0.359418	39	0.0232631
18	江苏	连云港	2018	1.59548	1.05022	1.88874	0.907594	1.56284	0.332374	0.264294	18592800	1.94739	11.0637	0.216126	0.00919053	0.0633792	0.143539	0.281717	39	0.0233596
18	江苏	连云港	2019	1.78036	1.11588	2.00635	0.95545	0.996883	0.337507	0.264294	19863900	1.77981	11.1284	0.205774	0.0104337	0.0715421	0.149116	0.326882	41	0.0233624
18	江苏	连云港	2020	1.79898	1.01046	2.12314	1.00077	0.777488	0.351176	0.264294	19877700	1.85963	11.1736	0.195705	0.0120191	0.0782772	0.153091	0.411456	71	0.0234559
18	江苏	连云港	2021	1.93724	1.07686	2.23646	1.08622	0.823486	0.376185	0.264294	21547800	2.27078	11.3183	0.246272	0.0131465	0.0684693	0.141015	0.43379	68	0.0235464
18	江苏	连云港	2022	2.18271	1.12671	2.55441	1.14965	0.829623	0.421644	0.264294	21871016	2.72986	11.3733	0.268867	0.0138246	0.0807788	0.133971	0.293462	60	0.0234334
18	江苏	连云港	2023	2.32951	1.14583	2.77514	1.20779	0.83576	0.454973	0.264294	21892888	3.09822	11.4615	0.311866	0.0143666	0.0730313	0.131703	0.290517	54	0.0233936
18	江苏	连云港	2024	2.47632	1.16495	3.03459	1.27893	0.750813	0.492115	0.264294	2.26332e+07	3.47254	11.5305	0.341217	0.014296	0.0663439	0.127906	0.29864	54	0.0236133
19	江苏	盐城	2006	1	1	2.11528	0.568355	1.58656	0.318307	0.304375	6675000	0.973185	9.68634	0.116183	0.00494322	0.0299425	0.0694134	0.210332	26	0.0211345
19	江苏	盐城	2007	1.06399	1.06399	1.77711	0.582205	1.33941	0.27368	0.304375	8263100	0.584954	9.85638	0.12083	0.00609563	0.0357723	0.0810323	0.229366	16	0.0213691
19	江苏	盐城	2008	1.18702	1.11563	1.90112	0.550697	1.49607	0.28852	0.304375	11201700	0.685781	10.0227	0.114413	0.00744463	0.0373782	0.0906575	0.203787	57	0.0215843
19	江苏	盐城	2009	1.50374	1.26682	1.86261	0.628204	1.63256	0.296961	0.304375	15002600	1.02337	10.1564	0.101446	0.00744473	0.041362	0.107183	0.23395	57	0.0217435
19	江苏	盐城	2010	1.58575	1.05454	1.68532	0.65652	1.35848	0.272407	0.304375	18910500	0.784849	10.3697	0.11561	0.00780562	0.0403462	0.122977	0.303932	37	0.0222129
19	江苏	盐城	2011	1.70064	1.07245	1.57878	0.671781	1.37811	0.262195	0.304375	15869800	0.772052	10.5456	0.123139	0.00764087	0.0502279	0.148023	0.184768	44	0.0223909
19	江苏	盐城	2012	1.89391	1.11364	1.5912	0.678482	1.37363	0.264364	0.304375	19408900	0.800943	10.6671	0.117267	0.0075662	0.0518857	0.152874	0.24455	40	0.0224645
19	江苏	盐城	2013	1.7457	0.921744	1.72637	0.682014	0.968913	0.270318	0.304375	22176900	0.614209	10.7788	0.116683	0.00760409	0.0550269	0.160876	0.227885	57	0.0227714
19	江苏	盐城	2014	1.75248	1.00389	2.03698	0.695413	0.924067	0.307484	0.304375	27513500	0.858832	10.8727	0.121273	0.00776707	0.0486372	0.158423	0.299448	44	0.0229115
19	江苏	盐城	2015	1.69716	0.968428	1.7416	0.69787	0.905826	0.272426	0.304375	33728900	0.633119	10.9656	0.120932	0.00792696	0.0642825	0.17847	0.205058	70	0.0230949
19	江苏	盐城	2016	1.72265	1.01502	1.81602	0.703953	0.94118	0.282871	0.304375	38828300	0.735709	11.0484	0.116145	0.00845888	0.0693111	0.160622	0.292067	72	0.0233083
19	江苏	盐城	2017	1.4155	0.8217	1.51755	0.714345	0.904618	0.247944	0.304375	42784900	0.521272	11.1405	0.117075	0.00861617	0.0778056	0.149952	0.376124	58	0.0235044
19	江苏	盐城	2018	1.44307	1.01948	1.88874	0.791244	0.703745	0.295995	0.304375	46977820	0.912884	11.2229	0.117302	0.00890278	0.0852174	0.155941	0.277968	60	0.0235124
19	江苏	盐城	2019	1.5734	1.09031	2.00635	0.834174	0.830369	0.318398	0.304375	49279732	1.24143	11.2704	0.117235	0.00936343	0.0874288	0.155141	0.366676	66	0.0236966
19	江苏	盐城	2020	1.63539	1.0394	2.12314	0.830002	0.787896	0.330586	0.304375	45633032	1.28292	11.3873	0.139109	0.0107889	0.0969017	0.164505	0.270142	47	0.0238044
19	江苏	盐城	2021	1.69227	1.03478	2.23646	0.884097	0.764116	0.349964	0.304375	47321456	1.53507	11.4966	0.17008	0.0110979	0.0911815	0.159475	0.327404	57	0.0237241
19	江苏	盐城	2022	1.76764	1.04454	2.55441	0.971268	0.708646	0.396734	0.304375	51769672	2.02977	11.5638	0.19713	0.0116896	0.0910146	0.155407	0.398293	75	0.0236638
19	江苏	盐城	2023	1.84878	1.05081	2.77514	1.0072	0.653176	0.425761	0.304375	56532480	2.27649	11.6145	0.196168	0.0123038	0.100691	0.16589	0.507226	89	0.0237615
19	江苏	盐城	2024	1.92993	1.05707	3.03459	1.05756	0.646347	0.46238	0.304375	5.87712e+07	2.63757	11.6666	0.212549	0.0131914	0.0823555	0.146146	0.584106	79	0.0239536
20	江苏	南通	2006	1	1	2.11528	0.573211	1.19813	0.308877	0.557269	4875700	0.702097	10.1208	0.444694	0.00902156	0.0111499	0.0625039	0.231782	18	0.0224779
20	江苏	南通	2007	1.12744	1.12744	1.77711	0.611831	1.19902	0.273676	0.557269	6339400	0.582362	10.3222	0.445126	0.0101818	0.00887519	0.0673864	0.221949	50	0.0226813
20	江苏	南通	2008	1.291	1.14508	1.90112	0.582652	1.2778	0.286791	0.557269	8400000	0.633471	10.5093	0.442314	0.0116681	0.0139806	0.0748914	0.266229	52	0.0227114
20	江苏	南通	2009	1.44503	1.11931	1.86261	0.589763	1.2677	0.282851	0.557269	10487100	0.621567	10.6142	0.382779	0.0120835	0.0132499	0.0817686	0.250959	16	0.0227516
20	江苏	南通	2010	1.62843	1.12692	1.68532	0.585267	1.27136	0.261456	0.557269	12813900	0.476477	10.7833	0.406839	0.0113433	0.00738913	0.0902277	0.170795	27	0.0229516
20	江苏	南通	2011	1.67665	1.02961	1.57878	0.597118	1.30972	0.25131	0.557269	23783600	0.465877	10.9332	0.402528	0.0100811	0.0110562	0.101344	0.275596	32	0.0231431
20	江苏	南通	2012	2.04199	1.2179	1.5912	0.609341	1.39914	0.256577	0.557269	28864700	0.583213	11.0296	0.358561	0.0100432	0.0249573	0.115604	0.273662	29	0.0232987
20	江苏	南通	2013	1.52258	0.745636	1.72637	0.614075	0.560168	0.251473	0.557269	32987300	0.0789474	11.1422	0.352688	0.0100596	0.0172919	0.110098	0.244124	39	0.0235823
20	江苏	南通	2014	1.59855	1.04989	2.03698	0.615187	0.517825	0.287203	0.557269	38963900	0.283375	11.2293	0.338171	0.0105979	0.0173224	0.112998	0.34124	55	0.0238192
20	江苏	南通	2015	1.71681	1.07398	1.7416	0.620887	0.554132	0.253948	0.557269	43760300	0.109167	11.3469	0.302672	0.0108445	0.0189788	0.115256	0.261038	67	0.0238185
20	江苏	南通	2016	1.8224	1.06151	1.81602	0.615933	0.578843	0.262771	0.557269	48119500	0.166098	11.4414	0.286612	0.0113898	0.0222381	0.104761	0.371927	59	0.0240288
20	江苏	南通	2017	1.39217	0.763922	1.51755	0.681337	0.568262	0.235234	0.557269	49592000	0.159173	11.5568	0.292626	0.0120554	0.0273186	0.100831	0.374275	64	0.0240939
20	江苏	南通	2018	1.44912	1.0409	1.88874	0.734209	0.408305	0.281406	0.557269	53956096	0.498864	11.6418	0.291746	0.0127229	0.0309589	0.100212	0.237505	93	0.0241451
20	江苏	南通	2019	1.74831	1.20647	2.00635	0.744021	0.263257	0.292753	0.557269	57517200	0.512849	11.706	0.269268	0.0137357	0.0377164	0.10381	0.243687	58	0.0241877
20	江苏	南通	2020	1.85432	1.06064	2.12314	0.791719	0.167279	0.309897	0.557269	60858948	0.692218	11.7725	0.262228	0.0155409	0.0440513	0.107864	0.421146	55	0.0243451
20	江苏	南通	2021	1.94253	1.04757	2.23646	0.875281	0.138885	0.332755	0.557269	63914068	1.04179	11.8605	0.311119	0.0170697	0.0376397	0.102514	0.316258	62	0.0242739
20	江苏	南通	2022	2.04905	1.05484	2.55441	0.889608	0.101858	0.371103	0.557269	62034996	1.30086	11.8917	0.324101	0.0188804	0.0472385	0.101443	0.285195	52	0.0242166
20	江苏	南通	2023	2.19904	1.05832	2.77514	0.887506	0.0648306	0.395961	0.557269	63647904	1.4311	11.9346	0.296301	0.019849	0.0423905	0.0999664	0.391642	61	0.0242713
20	江苏	南通	2024	2.34902	1.0618	3.03459	0.922478	0.0451262	0.430367	0.557269	6.58234e+07	1.72996	11.9847	0.317977	0.0205629	0.0384925	0.094917	0.452755	36	0.0243881
21	上海	上海	2006	1	1	0.115515	0.703232	1.64335	0.100054	1.39936	34974800	-0.0167061	10.8961	1.71102	0.023741	0.0207096	0.16941	0.302334	43	0.0251766
21	上海	上海	2007	1.07131	1.07131	0.127204	0.716133	1.62318	0.10249	1.39936	40451000	0.0212362	11.0415	1.67076	0.0234979	0.00832382	0.169402	0.302513	36	0.0254372
21	上海	上海	2008	1.14074	1.06481	0.178818	0.679032	1.5983	0.103412	1.39936	44049500	-0.0856152	11.1259	1.53902	0.023493	0.0161773	0.178436	0.326855	40	0.0255738
21	上海	上海	2009	1.24839	1.09437	0.1849	0.66526	1.57735	0.101908	1.39936	46189100	-0.143715	11.1736	1.20513	0.0232007	0.0285438	0.189909	0.347676	35	0.0259285
21	上海	上海	2010	1.32433	1.06083	0.172483	0.654419	1.66988	0.101504	1.39936	46304700	-0.121558	11.2619	1.3938	0.0223958	0.023963	0.184359	0.33698	38	0.0257222
21	上海	上海	2011	1.27626	0.963705	0.173255	0.639269	1.59335	0.0977704	1.39936	49599300	-0.229518	11.3496	1.41198	0.021702	0.0242409	0.19565	0.353498	54	0.025791
21	上海	上海	2012	1.30508	1.02258	0.185593	0.609187	1.5304	0.0939292	1.39936	51146400	-0.369874	11.3943	1.29405	0.0211171	0.0206665	0.196382	0.353188	35	0.026042
21	上海	上海	2013	1.31908	1.01073	0.193539	0.640489	1.63321	0.101344	1.39936	56441300	-0.180664	11.4594	1.1781	0.0206209	0.0180615	0.195164	0.381777	38	0.0263154
21	上海	上海	2014	1.35958	1.0307	0.208985	0.648541	1.4652	0.0998164	1.39936	60129700	-0.266021	11.5369	1.13431	0.0205351	0.0133713	0.194835	0.417139	46	0.0264791
21	上海	上海	2015	1.472	1.08269	0.248796	0.514523	1.38955	0.086197	1.39936	63493900	-0.750968	11.6026	1.04644	0.0208137	0.0249957	0.230281	0.402165	41	0.0267792
21	上海	上海	2016	1.65785	1.12626	0.242288	0.523294	1.52131	0.0898997	1.39936	67516800	-0.62821	11.7048	0.964121	0.0208634	0.0171583	0.231504	0.414979	52	0.0270559
21	上海	上海	2017	1.81619	1.09551	0.278485	0.582203	1.38457	0.0978421	1.39936	72409500	-0.500856	11.802	0.976367	0.02088	0.0274977	0.229237	0.422211	40	0.0270395
21	上海	上海	2018	2.10048	1.15653	0.233274	0.599984	1.28626	0.0921373	1.39936	76174792	-0.546591	11.8879	0.947538	0.0209212	0.0345273	0.231911	0.411825	62	0.0270648
21	上海	上海	2019	2.28696	1.08878	0.203456	0.598586	1.09925	0.0836193	1.39936	80059704	-0.712166	11.9389	0.89674	0.0212253	0.0266977	0.215314	0.443767	43	0.0272602
21	上海	上海	2020	2.47225	1.08102	0.266922	0.536656	1.23109	0.0869529	1.39936	88305856	-0.779047	11.9614	0.890784	0.0217304	0.0270975	0.207942	0.48231	41	0.0273118
21	上海	上海	2021	2.89903	1.17263	0.285429	0.538764	1.28874	0.0908836	1.39936	95370328	-0.715314	12.0746	0.929011	0.0220412	0.0150976	0.193133	0.468422	46	0.0273521
21	上海	上海	2022	3.59222	1.23911	0.303035	0.534207	1.28358	0.0922733	1.39936	94445232	-0.721583	12.1065	0.941521	0.022204	0.0398349	0.209626	0.497381	50	0.0274096
21	上海	上海	2023	3.96516	1.25976	0.330022	0.547054	1.27842	0.0968968	1.39936	107500000	-0.661282	12.1539	0.89397	0.0221224	0.0280823	0.204125	0.686255	65	0.0274999
21	上海	上海	2024	4.3381	1.2804	0.358068	0.537615	1.28183	0.0991444	1.39936	1.15294e+08	-0.670111	12.2896	0.791461	0.0222121	0.027828	0.183116	0.765474	59	0.027805
22	浙江	嘉兴	2006	1	1	0.480101	0.722998	0.774765	0.123118	0.804114	8003227	-0.32012	10.4081	0.744892	0.00624771	0.00365594	0.0638747	0.171161	24	0.0227194
22	浙江	嘉兴	2007	1.12841	1.12841	0.481478	0.752487	0.752053	0.126296	0.804114	9000421	-0.234995	10.5507	0.762437	0.00717465	0.00136152	0.0668609	0.243206	54	0.0227578
22	浙江	嘉兴	2008	1.26488	1.12094	0.485823	0.733608	0.692734	0.122973	0.804114	10067972	-0.340295	10.6647	0.758409	0.00868147	0.00498208	0.0748206	0.302393	42	0.0229215
22	浙江	嘉兴	2009	1.35045	1.06765	0.500088	0.784602	0.707332	0.131263	0.804114	12334071	-0.144316	10.7011	0.612965	0.00901621	0.0101238	0.0840307	0.248223	35	0.0231193
22	浙江	嘉兴	2010	1.47719	1.09385	0.531667	0.766855	0.669909	0.131859	0.804114	14882637	-0.209184	10.8653	0.655468	0.0116217	0.00943213	0.0844483	0.247311	30	0.0230963
22	浙江	嘉兴	2011	1.5522	1.05078	0.511013	0.77078	0.750543	0.13198	0.804114	14882661	-0.151452	10.9712	0.681704	0.0122485	0.00526621	0.0891559	0.260603	68	0.0232827
22	浙江	嘉兴	2012	1.69461	1.09175	0.518702	0.767903	0.648795	0.129911	0.804114	16423109	-0.230918	11.026	0.623596	0.0128306	0.00102009	0.0895987	0.329384	52	0.0234834
22	浙江	嘉兴	2013	1.80264	1.06375	0.537718	0.760943	0.805766	0.135357	0.804114	19101518	-0.124269	11.1177	0.608206	0.0132718	0.00650955	0.0937945	0.316801	39	0.0235905
22	浙江	嘉兴	2014	1.88131	1.04364	0.685197	0.796749	0.833941	0.157877	0.804114	22212077	0.129284	11.1819	0.593081	0.0135091	0.00796665	0.0958514	0.322483	30	0.0237831
22	浙江	嘉兴	2015	1.97289	1.04868	0.580166	0.816971	0.855725	0.148504	0.804114	25138180	0.136183	11.2238	0.52375	0.0106793	0.019961	0.114736	0.33742	43	0.0240139
22	浙江	嘉兴	2016	2.07782	1.05318	0.470004	0.78206	0.828314	0.130521	0.804114	27901555	-0.0858729	11.2817	0.523299	0.0130517	0.0136361	0.11113	0.19609	44	0.0240593
22	浙江	嘉兴	2017	1.46143	0.703347	0.582448	0.813361	0.886277	0.149121	0.804114	30096446	0.148161	11.3827	0.546984	0.0134906	0.0113123	0.109928	0.299502	38	0.0240944
22	浙江	嘉兴	2018	1.71326	1.17232	0.616088	0.835442	0.675205	0.150345	0.804114	22429602	0.092513	11.4714	0.564006	0.0135177	0.0140116	0.117342	0.299835	44	0.0240468
22	浙江	嘉兴	2019	1.66241	0.97032	0.633135	0.858988	0.639223	0.154306	0.804114	24959582	0.159176	11.5294	0.522127	0.013565	0.0370956	0.141398	0.24996	27	0.0242019
22	浙江	嘉兴	2020	1.78499	1.07373	0.719718	0.95587	0.582417	0.1749	0.804114	25707880	0.51332	11.5408	0.548453	0.0141019	0.0203795	0.128008	0.357559	34	0.0243603
22	浙江	嘉兴	2021	1.97549	1.10672	0.694588	1.03128	0.604938	0.181724	0.804114	27294462	0.769313	11.6598	0.5923	0.0143218	0.0186155	0.124245	0.26061	49	0.0241527
22	浙江	嘉兴	2022	2.06905	1.04736	0.74645	1.06319	0.598306	0.191576	0.804114	29259664	0.912328	11.7084	0.65191	0.0119213	0.0342595	0.122634	0.413383	50	0.0241873
22	浙江	嘉兴	2023	2.158	1.01612	0.790245	1.09584	0.591674	0.200565	0.804114	31424880	1.05187	11.7478	0.624394	0.0149239	0.0276063	0.117097	0.554202	46	0.0242525
22	浙江	嘉兴	2024	2.24695	0.984882	0.832267	1.15754	0.576819	0.212682	0.804114	3.36277e+07	1.28341	11.8129	0.636552	0.0155422	0.0260637	0.110444	0.656159	44	0.0246511
23	浙江	宁波	2006	1	1	0.480101	0.815024	1.09924	0.14273	0.3757	14130000	0.235154	10.6703	1.16364	0.0180558	0.0122126	0.101215	0.256916	46	0.0235393
23	浙江	宁波	2007	1.09141	1.09141	0.481478	0.934774	1.15196	0.15888	0.3757	14865400	0.685054	10.8204	1.24541	0.0182877	0.0121515	0.10756	0.213431	65	0.0235496
23	浙江	宁波	2008	1.17824	1.07956	0.485823	0.913046	1.20474	0.158101	0.3757	16108600	0.653032	10.927	1.18295	0.0182281	0.0123078	0.110323	0.211298	65	0.0235818
23	浙江	宁波	2009	1.22314	1.0381	0.500088	0.936234	1.09663	0.159829	0.3757	18604500	0.662964	11.0112	0.943017	0.0185702	0.0166348	0.114884	0.320315	41	0.0237237
23	浙江	宁波	2010	1.28409	1.04983	0.531667	0.339518	1.03971	0.0892043	0.3757	20349900	-1.39774	11.1451	1.06601	0.0185148	0.0132613	0.114108	0.297036	44	0.0236399
23	浙江	宁波	2011	1.29861	1.01131	0.511013	1.00165	1.00781	0.166818	0.3757	23855100	0.829205	11.2789	1.02079	0.0183956	0.0149971	0.12084	0.284362	61	0.0237269
23	浙江	宁波	2012	1.36225	1.049	0.518702	0.973971	1.12034	0.167248	0.3757	29014300	0.823572	11.3544	0.88839	0.0180771	0.0150014	0.120728	0.330766	55	0.0240239
23	浙江	宁波	2013	1.45206	1.06593	0.537718	0.980594	1.41024	0.177783	0.3757	34229500	1.07517	11.4126	0.836046	0.0181297	0.0197907	0.126464	0.334183	41	0.0241814
23	浙江	宁波	2014	1.50425	1.03594	0.685197	1.02278	1.33836	0.198501	0.3757	39894600	1.27646	11.4503	0.813652	0.0179247	0.0177418	0.126614	0.272153	64	0.0241258
23	浙江	宁波	2015	1.54128	1.02462	0.580166	0.971863	1.32943	0.179646	0.3757	45065800	1.01714	11.479	0.754328	0.0181504	0.0296829	0.151005	0.363671	29	0.0242604
23	浙江	宁波	2016	1.56916	1.01809	0.470004	0.975966	1.43237	0.169792	0.3757	49613900	1.02515	11.5406	0.702686	0.0177754	0.019472	0.143685	0.384972	62	0.0243772
23	浙江	宁波	2017	1.50963	0.962062	0.582448	0.984634	1.32998	0.181489	0.3757	50095800	1.06296	11.6437	0.746588	0.0175345	0.0162929	0.139023	0.337096	65	0.0243694
23	浙江	宁波	2018	1.5958	1.05708	0.616088	1.04363	1.37398	0.193804	0.3757	51919288	1.32257	11.7183	0.769177	0.0164349	0.0191558	0.142418	0.281577	42	0.0245397
23	浙江	宁波	2019	1.64568	1.03126	0.633135	1.07311	1.14023	0.193386	0.3757	56124752	1.26304	11.7714	0.762791	0.016834	0.0248757	0.146894	0.289933	28	0.0247382
23	浙江	宁波	2020	1.66453	1.01145	0.719718	1.08138	1.07994	0.203068	0.3757	59211612	1.31137	11.8037	0.773439	0.0178673	0.0183539	0.138269	0.277176	26	0.0248646
23	浙江	宁波	2021	1.84265	1.10701	0.694588	1.0888	1.16216	0.203127	0.3757	65724888	1.3789	11.9451	0.809674	0.0182437	0.0150496	0.132244	0.398751	58	0.0248407
23	浙江	宁波	2022	2.02537	1.09916	0.74645	1.07196	1.18866	0.20788	0.3757	72560280	1.37962	12.004	0.815273	0.0186435	0.0322965	0.139206	0.45446	39	0.024938
23	浙江	宁波	2023	2.13276	1.10968	0.790245	1.1426	1.21515	0.222365	0.3757	78002304	1.67372	12.0416	0.778294	0.0260056	0.0273046	0.135849	0.528696	40	0.0249503
23	浙江	宁波	2024	2.24015	1.1202	0.832267	1.16391	1.19042	0.229292	0.3757	8.46325e+07	1.75971	12.1314	0.782607	0.0370772	0.02424	0.122903	0.605606	35	0.0251593
24	浙江	舟山	2006	1	1	0.480101	0.826688	1.49959	0.154485	0.0721974	2101700	0.57161	10.4143	0.630917	0.0168395	0.0483345	0.119124	0.228309	24	0.0233644
24	浙江	舟山	2007	1.03102	1.03102	0.481478	0.862272	1.42204	0.156993	0.0721974	2746100	0.636974	10.6142	0.735665	0.0201053	0.0509296	0.134147	0.299074	42	0.0234847
24	浙江	舟山	2008	1.02289	0.992115	0.485823	0.869454	1.1625	0.151687	0.0721974	3336300	0.472559	10.7844	0.820938	0.0213902	0.0656638	0.149935	0.266588	26	0.0234655
24	浙江	舟山	2009	0.957464	0.936036	0.500088	0.904745	1.06472	0.155159	0.0721974	3886300	0.531567	10.8141	0.888717	0.020616	0.0628983	0.153241	0.28639	30	0.0235782
24	浙江	舟山	2010	0.985553	1.02934	0.531667	0.359325	1.12375	0.0937922	0.0721974	4027200	-1.26771	10.9035	1.19214	0.019917	0.0721818	0.172338	0.183397	33	0.023822
24	浙江	舟山	2011	1.09005	1.10603	0.511013	0.884174	1.1516	0.156179	0.0721974	4760900	0.533676	11.0109	1.24258	0.0201352	0.103877	0.214812	0.234014	58	0.023985
24	浙江	舟山	2012	1.12171	1.02904	0.518702	0.91654	1.19059	0.162046	0.0721974	5706000	0.679064	11.1013	1.28228	0.0201481	0.0921481	0.205332	0.288874	34	0.0240884
24	浙江	舟山	2013	1.13211	1.00927	0.537718	0.887179	1.41939	0.16661	0.0721974	7500200	0.762254	11.1808	0.955422	0.0203502	0.118329	0.231095	0.26458	36	0.0242859
24	浙江	舟山	2014	0.725499	0.64084	0.685197	0.883525	0.656942	0.163909	0.0721974	9608800	0.295155	11.2557	0.855109	0.0198351	0.0983747	0.21238	0.316412	21	0.024345
24	浙江	舟山	2015	0.758888	1.04602	0.580166	0.86078	0.613222	0.147598	0.0721974	11347600	0.106488	11.2963	0.782908	0.020301	0.136357	0.25745	0.26837	35	0.0243157
24	浙江	舟山	2016	1.13436	1.49476	0.470004	0.820879	0.555109	0.128213	0.0721974	13111400	-0.155385	11.4345	0.651278	0.0210662	0.120999	0.232805	0.221347	30	0.0246281
24	浙江	舟山	2017	1.28402	1.13193	0.582448	0.871384	1.42028	0.169986	0.0721974	14503100	0.742268	11.4769	0.690682	0.0188377	0.117603	0.228942	0.308767	32	0.0244414
24	浙江	舟山	2018	1.72614	1.34433	0.616088	1.00846	1.33343	0.188462	0.0721974	15590832	1.17217	11.5743	0.910674	0.0196351	0.130262	0.247342	0.348253	25	0.0244682
24	浙江	舟山	2019	1.23627	0.716206	0.633135	1.09212	1.38757	0.20209	0.0721974	16931644	1.51131	11.6694	1.00634	0.0211012	0.123673	0.237334	0.266778	30	0.0243724
24	浙江	舟山	2020	1.26029	1.01943	0.719718	1.09033	1.3936	0.212253	0.0721974	17185618	1.5743	11.7775	1.10382	0.0217026	0.101613	0.207009	0.287779	34	0.0239523
24	浙江	舟山	2021	1.34224	1.06502	0.694588	1.18531	1.53808	0.224615	0.0721974	18062084	1.98761	11.9374	1.32218	0.0238069	0.0872577	0.188715	0.352096	47	0.0236595
24	浙江	舟山	2022	1.4427	1.07485	0.74645	1.12986	1.61059	0.225838	0.0721974	18784568	1.89029	12.0244	1.7331	0.0223778	0.101536	0.181559	0.343598	38	0.0233775
24	浙江	舟山	2023	1.37185	1.00748	0.790245	1.19509	1.6831	0.240849	0.0721974	20306118	2.19994	12.0957	1.70346	0.039497	0.0871091	0.179225	0.374448	24	0.0234698
24	浙江	舟山	2024	1.30099	0.940113	0.832267	1.23797	1.76415	0.253141	0.0721974	2.14148e+07	2.43809	12.1511	1.66341	0.0456641	0.079102	0.172129	0.384476	27	0.0236712
25	浙江	台州	2006	1	1	0.480101	0.784659	1.52453	0.149995	0.324595	5405680	0.44625	10.1562	0.457531	0.00369483	0.0121764	0.0707913	0.173615	51	0.0231523
25	浙江	台州	2007	1.06171	1.06171	0.481478	0.820816	1.43758	0.152331	0.324595	6243547	0.506612	10.3145	0.487646	0.0042391	0.0104494	0.0733805	0.206792	41	0.023233
25	浙江	台州	2008	1.13462	1.06867	0.485823	0.804408	1.30476	0.147413	0.324595	6547565	0.355329	10.4379	0.48827	0.00473489	0.0141311	0.0782955	0.221309	50	0.0233643
25	浙江	台州	2009	1.18354	1.04312	0.500088	0.857766	1.34693	0.156703	0.324595	7297767	0.579819	10.4738	0.399645	0.00501703	0.0194151	0.0855577	0.25147	30	0.0234977
25	浙江	台州	2010	1.27902	1.08068	0.531667	0.851565	1.35275	0.159825	0.324595	6.89743e+06	0.586495	10.6223	0.469437	0.00497975	0.0236065	0.0908603	0.294566	35	0.0235012
25	浙江	台州	2011	1.1506	0.89959	0.511013	0.867929	1.25915	0.15697	0.324595	7.99851e+06	0.557743	10.7415	0.474945	0.005129	0.0234601	0.0952284	0.231213	52	0.023575
25	浙江	台州	2012	1.18413	1.02914	0.518702	0.848928	1.30024	0.156617	0.324595	9.52687e+06	0.528893	10.782	0.442141	0.00509109	0.0229287	0.097795	0.279831	60	0.0237212
25	浙江	台州	2013	1.16899	0.987214	0.537718	0.842094	1.30645	0.158189	0.324595	11161848	0.524308	10.8528	0.424393	0.00518258	0.0254633	0.103058	0.308501	46	0.0238568
25	浙江	台州	2014	1.28682	1.1008	0.685197	0.875771	1.22036	0.177499	0.324595	12609548	0.685937	10.9087	0.397714	0.00522933	0.03116	0.10893	0.207764	52	0.0239419
25	浙江	台州	2015	1.33772	1.03955	0.580166	0.877348	1.40311	0.170002	0.324595	13734543	0.748255	10.9425	0.369121	0.00531276	0.0445735	0.128017	0.308159	48	0.0241389
25	浙江	台州	2016	1.48445	1.10969	0.470004	0.831827	1.46597	0.153053	0.324595	14464187	0.556751	11.0149	0.340594	0.00536465	0.0441605	0.132753	0.260893	31	0.0242284
25	浙江	台州	2017	1.13527	0.764775	0.582448	0.856973	1.37398	0.167031	0.324595	16184391	0.658654	11.1307	0.358646	0.00540261	0.0412335	0.128385	0.332712	27	0.0242278
25	浙江	台州	2018	1.23678	1.08942	0.616088	0.869186	1.42091	0.173707	0.324595	17495326	0.760338	11.2282	0.358129	0.00542787	0.0456062	0.133956	0.315329	42	0.0242531
25	浙江	台州	2019	1.26446	1.02238	0.633135	0.910031	1.55003	0.184041	0.324595	19367326	1.00849	11.2635	0.333208	0.00570423	0.0650374	0.150981	0.245595	24	0.0243827
25	浙江	台州	2020	1.26778	1.00262	0.719718	0.940716	1.64513	0.200469	0.324595	20180754	1.2486	11.2778	0.362417	0.00602894	0.0570598	0.133655	0.389096	19	0.0245285
25	浙江	台州	2021	1.27236	1.00361	0.694588	0.980275	1.73093	0.204547	0.324595	21613588	1.42877	11.3736	0.414048	0.0063588	0.0482108	0.126803	0.268809	18	0.0245128
25	浙江	台州	2022	1.28402	1.00917	0.74645	0.999397	1.73173	0.213029	0.324595	23018472	1.53353	11.4093	0.460408	0.00670021	0.0654739	0.138683	0.366449	40	0.0245775
25	浙江	台州	2023	1.29582	0.989102	0.790245	1.03105	1.73253	0.222088	0.324595	21315106	1.67515	11.4401	0.439773	0.0116721	0.0548548	0.134057	0.531225	36	0.0247177
25	浙江	台州	2024	1.30763	0.96904	0.832267	1.06691	1.80367	0.233268	0.324595	2.22146e+07	1.88197	11.5021	0.394477	0.0169058	0.0514167	0.12698	0.623328	35	0.0246055
26	浙江	温州	2006	1	1	0.480101	0.782471	0.761716	0.130045	0.369414	5578800	-0.126254	10.0653	0.429956	0.00728159	0.00812999	0.0783304	0.218746	32	0.0237835
26	浙江	温州	2007	1.11554	1.11554	0.481478	0.805995	0.734006	0.132366	0.369414	6405900	-0.0652439	10.2144	0.431871	0.00810492	0.0092549	0.0820716	0.252346	45	0.0239362
26	浙江	温州	2008	1.21121	1.08576	0.485823	0.801856	0.763643	0.133139	0.369414	6558400	-0.0542096	10.2337	0.401193	0.00817576	0.0121879	0.086561	0.175882	39	0.0240246
26	浙江	温州	2009	1.29016	1.06518	0.500088	0.838249	0.736216	0.138561	0.369414	7244800	0.0606751	10.2681	0.357162	0.00841903	0.0220174	0.0990544	0.294163	32	0.0241843
26	浙江	温州	2010	1.30794	1.01379	0.531667	0.849035	0.746047	0.143862	0.369414	8020000	0.128454	10.3805	0.393096	0.00816004	0.0280445	0.105665	0.245718	49	0.0242175
26	浙江	温州	2011	1.3187	1.00822	0.511013	0.847508	0.699651	0.140039	0.369414	15403100	0.0734389	10.5344	0.405425	0.00820507	0.0289765	0.107795	0.228695	41	0.024338
26	浙江	温州	2012	1.40323	1.0641	0.518702	0.921051	1.17024	0.162072	0.369414	21103400	0.679431	10.6021	0.348074	0.00830588	0.0264789	0.104623	0.267454	38	0.0244746
26	浙江	温州	2013	1.55147	1.10564	0.537718	0.912646	1.38255	0.16877	0.369414	26181600	0.822124	10.6907	0.313661	0.00855115	0.0280196	0.107661	0.22785	34	0.0246431
26	浙江	温州	2014	1.55231	1.00054	0.685197	0.910104	1.35434	0.18515	0.369414	30528100	0.902676	10.7511	0.293428	0.00875665	0.0313648	0.112394	0.239042	38	0.0246031
26	浙江	温州	2015	1.62597	1.04745	0.580166	0.824712	1.38493	0.163104	0.369414	34563900	0.554655	10.8153	0.259765	0.00892998	0.0356196	0.121924	0.275085	35	0.0248376
26	浙江	温州	2016	1.77553	1.09199	0.470004	0.784415	1.44787	0.146795	0.369414	39057400	0.381091	10.9023	0.234353	0.00914134	0.0442682	0.130097	0.290884	43	0.025124
26	浙江	温州	2017	1.24727	0.702473	0.582448	0.791147	1.37786	0.159091	0.369414	41784900	0.436251	10.9525	0.244329	0.00935542	0.05474	0.140723	0.237214	34	0.0251639
26	浙江	温州	2018	1.42193	1.14004	0.616088	0.849517	1.38389	0.17035	0.369414	45169476	0.665603	11.0577	0.250375	0.00932682	0.0540683	0.14473	0.269871	54	0.0251612
26	浙江	温州	2019	1.37169	0.964667	0.633135	0.876343	0.648196	0.156657	0.369414	49821932	0.225215	11.1435	0.287867	0.0109087	0.0764453	0.164062	0.262467	31	0.0253277
26	浙江	温州	2020	3.65444	2.66419	0.719718	0.902433	1.73064	0.198	0.369414	52263208	1.18092	11.1768	0.319647	0.0125935	0.0620668	0.149941	0.353741	33	0.0254314
26	浙江	温州	2021	1.41251	0.386518	0.694588	0.971721	0.575999	0.173702	0.369414	58221212	0.544045	11.2823	0.314826	0.0132227	0.0534365	0.139293	0.396935	28	0.0253744
26	浙江	温州	2022	0.992365	0.702556	0.74645	0.956448	0.343987	0.171976	0.369414	62762468	0.358661	11.3325	0.36498	0.0151595	0.0697758	0.140785	0.371067	37	0.0253838
26	浙江	温州	2023	0.884974	0.593185	0.790245	0.960911	0.111976	0.171707	0.369414	67406888	0.234795	11.4014	0.323219	0.0188372	0.0633698	0.134692	0.336217	36	0.0254575
26	浙江	温州	2024	0.777583	0.483814	0.832267	0.985333	0.0984013	0.179303	0.369414	7.30421e+07	0.339704	11.4993	0.302152	0.02317	0.0560807	0.121171	0.35527	51	0.0259277
27	福建	福州	2006	1	1	0.104654	0.752557	0.892195	0.0854141	0.265791	7323400	-0.412386	10.108	0.762778	0.0322337	-0.00620555	0.0864267	0.247559	7	0.0237385
27	福建	福州	2007	1.13301	1.13301	0.0986907	0.802542	0.862484	0.0900485	0.265791	10014500	-0.267784	10.3214	0.690292	0.0344871	-0.00168878	0.0696845	0.194044	28	0.0239447
27	福建	福州	2008	1.26693	1.1182	0.0999361	0.797723	0.804247	0.0881043	0.265791	12527100	-0.326483	10.4537	0.596048	0.0366444	0.00394196	0.0752463	0.212935	9	0.0239901
27	福建	福州	2009	1.45287	1.14676	0.106066	0.855918	0.828435	0.0965606	0.265791	16467200	-0.104831	10.5714	0.455326	0.0386728	0.00366961	0.076543	0.300977	28	0.0240462
27	福建	福州	2010	1.64246	1.13049	0.116102	0.839704	0.805495	0.0951736	0.265791	23174400	-0.169814	10.7271	0.513554	0.0395874	0.00450274	0.0809279	0.266458	47	0.0238829
27	福建	福州	2011	1.5306	0.931896	0.114749	0.870688	0.665944	0.0951976	0.265791	27272500	-0.168152	10.8584	0.58716	0.0398201	0.0113256	0.0951111	0.244826	38	0.0239695
27	福建	福州	2012	1.63223	1.0664	0.127586	0.870835	0.660925	0.0966022	0.265791	32664900	-0.16178	10.9698	0.451807	0.0408817	0.00661686	0.0946484	0.329042	28	0.0239396
27	福建	福州	2013	1.73308	1.06178	0.132586	0.911705	0.78033	0.105266	0.265791	38698400	0.0702645	11.0654	0.400699	0.0418872	0.0164423	0.109895	0.319111	28	0.0239471
27	福建	福州	2014	1.79801	1.03746	0.126154	1.00368	0.754913	0.115085	0.265791	44275900	0.361403	11.15	0.39494	0.0413992	0.0118592	0.106615	0.243254	45	0.0240125
27	福建	福州	2015	1.69649	0.943537	0.12145	0.978192	0.667804	0.109168	0.265791	48939100	0.206139	11.2128	0.359451	0.0411494	0.0286416	0.125651	0.206615	50	0.024253
27	福建	福州	2016	1.74752	1.03008	0.0604473	1.00399	0.574257	0.1027	0.265791	52180700	0.179577	11.3204	0.323853	0.0403402	0.0355875	0.127848	0.258312	63	0.0243985
27	福建	福州	2017	1.38771	0.794104	0.0941147	1.01399	0.59032	0.108312	0.265791	58233900	0.250829	11.4414	0.309747	0.0389401	0.0406063	0.125119	0.248925	44	0.0246397
27	福建	福州	2018	1.3552	0.976573	0.11149	1.07883	0.510217	0.116218	0.265791	65047268	0.426383	11.5544	0.289867	0.0391607	0.0286957	0.108589	0.314188	50	0.0247296
27	福建	福州	2019	1.36148	1.00464	0.108241	1.11517	0.799295	0.127732	0.265791	71551992	0.762451	11.6523	0.267471	0.0413022	0.0297373	0.100267	0.266341	29	0.0249791
27	福建	福州	2020	1.45526	1.06888	0.133229	1.11074	0.891967	0.132534	0.265791	78420984	0.834595	11.6988	0.248538	0.0437185	0.0275242	0.0949503	0.298638	31	0.0250477
27	福建	福州	2021	1.72287	1.18389	0.134085	1.13019	1.00874	0.138023	0.265791	53302700	0.988291	11.8093	0.293025	0.0459082	0.0154891	0.081704	0.374061	32	0.0250869
27	福建	福州	2022	2.0639	1.19794	0.143965	1.09445	1.09089	0.136944	0.265791	56434700	0.934183	11.8893	0.298391	0.048933	0.0249889	0.0817412	0.278277	40	0.025106
27	福建	福州	2023	2.24108	1.25329	0.162197	1.04967	1.17304	0.135747	0.265791	59256436	0.855405	11.9359	0.266177	0.0571119	0.0194009	0.0777279	0.278955	40	0.0252676
27	福建	福州	2024	2.41825	1.30863	0.174646	1.04435	1.40065	0.142441	0.265791	5.90722e+07	1.0151	12.0286	0.246324	0.053287	0.0191006	0.0718162	0.277164	34	0.0253846
28	福建	厦门	2006	1	1	0.104654	0.74812	0.46509	0.0738518	0.194649	6621000	-0.743926	10.5955	2.27175	0.0251736	0.0131099	0.138288	0.177319	14	0.0245836
28	福建	厦门	2007	1.10534	1.10534	0.0986907	0.870832	0.45814	0.0879567	0.194649	9277000	-0.333573	10.7529	2.12788	0.0276316	0.00852946	0.139736	0.232089	16	0.0247943
28	福建	厦门	2008	1.49614	1.35356	0.0999361	0.868839	0.483984	0.0885271	0.194649	9283200	-0.320322	10.8136	1.94595	0.0297546	0.0110249	0.146975	0.207619	37	0.02497
28	福建	厦门	2009	1.59436	1.06565	0.106066	0.858985	0.467343	0.0876181	0.194649	8821200	-0.361793	10.9017	1.65215	0.0321212	0.0153515	0.149677	0.259399	40	0.0250428
28	福建	厦门	2010	1.52675	0.957594	0.116102	0.815592	0.404814	0.08189	0.194649	10099900	-0.549113	11.008	1.7966	0.0322128	0.00827174	0.142826	0.213915	42	0.0247846
28	福建	厦门	2011	1.5585	1.0208	0.114749	0.87559	0.418183	0.0894035	0.194649	11280900	-0.334892	11.1315	1.72832	0.0316146	0.00697997	0.148379	0.297158	30	0.0247169
28	福建	厦门	2012	1.63865	1.05143	0.127586	0.884402	0.454649	0.0929368	0.194649	13229800	-0.268138	11.1915	1.60921	0.0319355	0.0136145	0.158343	0.264955	27	0.0249915
28	福建	厦门	2013	1.65854	1.01214	0.132586	0.915825	0.480559	0.0980341	0.194649	13372600	-0.137674	11.2277	1.65728	0.0325359	0.00831807	0.164432	0.367563	28	0.0250803
28	福建	厦门	2014	1.65419	0.997378	0.126154	0.940459	0.671273	0.105204	0.194649	15621600	0.0830891	11.2655	1.4906	0.0358957	0.00146571	0.159398	0.232266	32	0.0253182
28	福建	厦门	2015	1.76804	1.06883	0.12145	0.8525	0.718869	0.0951331	0.194649	18876500	-0.186193	11.3368	1.36124	0.0317181	0.011839	0.171048	0.255636	32	0.0254359
28	福建	厦门	2016	1.82148	1.03023	0.0604473	0.842902	0.678704	0.0857193	0.194649	21598100	-0.29435	11.3915	1.24482	0.0307312	0.0268807	0.184219	0.332426	59	0.0255504
28	福建	厦门	2017	1.93448	1.06203	0.0941147	0.883723	0.669007	0.0944316	0.194649	23814600	-0.136688	11.4762	1.25738	0.0330126	0.0217516	0.172988	0.230196	57	0.0255841
28	福建	厦门	2018	2.03684	1.05292	0.11149	0.93422	0.562136	0.0998942	0.194649	26219874	-0.0300529	11.6105	1.1017	0.0327621	0.0252273	0.163204	0.268044	20	0.0257694
28	福建	厦门	2019	2.42111	1.18866	0.108241	0.995099	0.626821	0.108616	0.194649	28579662	0.223778	11.674	1.06687	0.0305859	0.0240392	0.151782	0.326252	32	0.0258638
28	福建	厦门	2020	2.64926	1.09424	0.133229	1.01072	0.624967	0.113427	0.194649	31094672	0.294536	11.7299	1.074	0.0364093	0.0299868	0.151811	0.315027	35	0.0257671
28	福建	厦门	2021	2.96949	1.12087	0.134085	1.03755	0.699449	0.118727	0.194649	26964400	0.44216	11.8363	1.21361	0.0378409	0.0245408	0.145292	0.370459	35	0.0257609
28	福建	厦门	2022	3.41004	1.14836	0.143965	1.08617	0.744377	0.126992	0.194649	29710800	0.649208	11.8924	1.20032	0.0399397	0.0264155	0.140337	0.259539	40	0.0260864
28	福建	厦门	2023	3.75334	1.17222	0.162197	1.13457	0.789306	0.136217	0.194649	29859354	0.861743	11.9279	1.17819	0.0424629	0.0189071	0.134464	0.231476	25	0.0263759
28	福建	厦门	2024	4.09664	1.19608	0.174646	1.17969	0.845485	0.144648	0.194649	3.07672e+07	1.06706	11.9863	1.08582	0.0432897	0.0146711	0.12332	0.229215	7	0.0262742
29	福建	漳州	2006	1	1	0.104654	0.627319	0.810904	0.0680194	0.172479	2045900	-0.9012	9.65244	0.462786	0.00822797	0.0197625	0.0674941	0.170832	15	0.0216338
29	福建	漳州	2007	1.05523	1.05523	0.0986907	0.685663	0.76058	0.073143	0.172479	2720200	-0.743257	9.83106	0.400806	0.00948734	0.0236896	0.0774549	0.185249	28	0.0216948
29	福建	漳州	2008	1.11679	1.05834	0.0999361	0.689082	0.780496	0.0742216	0.172479	3566700	-0.715875	9.94933	0.369854	0.0108587	0.0318117	0.0923733	0.241462	31	0.0217283
29	福建	漳州	2009	1.2076	1.08131	0.106066	0.755426	0.738807	0.0819735	0.172479	4702700	-0.515127	10.1257	0.273421	0.0118258	0.041525	0.100702	0.215249	51	0.0221124
29	福建	漳州	2010	1.30586	1.08137	0.116102	0.755143	0.872144	0.0865646	0.172479	6736700	-0.409841	10.3244	0.341677	0.0124682	0.0402131	0.100627	0.257322	46	0.0221764
29	福建	漳州	2011	1.27548	0.976736	0.114749	0.789024	0.836561	0.0896251	0.172479	10305000	-0.321256	10.509	0.350108	0.0123196	0.0392524	0.101809	0.312967	63	0.0222655
29	福建	漳州	2012	1.3306	1.04321	0.127586	0.76522	0.795942	0.0871856	0.172479	14440900	-0.423219	10.6344	0.303022	0.012668	0.0439786	0.108291	0.298075	49	0.0223217
29	福建	漳州	2013	1.36047	1.02244	0.132586	0.744452	0.90483	0.0880491	0.172479	17132600	-0.409906	10.744	0.262346	0.0133278	0.0467105	0.114069	0.291126	37	0.0223342
29	福建	漳州	2014	1.36327	1.00206	0.126154	0.759343	0.843796	0.0875334	0.172479	20818600	-0.408956	10.8553	0.269617	0.0139608	0.0408952	0.106394	0.307467	44	0.0224018
29	福建	漳州	2015	1.48163	1.08682	0.12145	0.809416	0.835713	0.0928855	0.172479	25160800	-0.247091	10.9837	0.196983	0.0142745	0.0598775	0.120565	0.360272	61	0.0224349
29	福建	漳州	2016	1.64015	1.10699	0.0604473	0.849527	0.836977	0.0906123	0.172479	28279300	-0.154446	11.0704	0.180699	0.0142046	0.0561722	0.114243	0.244505	66	0.0225473
29	福建	漳州	2017	1.23859	0.755169	0.0941147	0.875806	0.910717	0.0997013	0.172479	33281000	0.0152514	11.2051	0.170429	0.0141956	0.0606566	0.115626	0.280084	71	0.0229503
29	福建	漳州	2018	1.19593	0.965555	0.11149	0.886432	0.89133	0.102551	0.172479	37075032	0.0502361	11.3639	0.159309	0.0147383	0.0483276	0.0984057	0.27976	56	0.0230964
29	福建	漳州	2019	1.29357	1.08165	0.108241	0.927011	1.07222	0.111791	0.172479	37112108	0.320663	11.4363	0.154996	0.0179435	0.0471595	0.0939742	0.33055	35	0.0231256
29	福建	漳州	2020	1.257	0.971732	0.133229	0.993767	1.2211	0.126738	0.172479	26794942	0.678057	11.4095	0.177365	0.019372	0.0497108	0.0976655	0.267904	39	0.0229912
29	福建	漳州	2021	1.37807	1.09631	0.134085	1.05478	1.34352	0.137451	0.172479	20365100	0.978191	11.5475	0.200693	0.0192134	0.0334018	0.0803068	0.351993	47	0.0230113
29	福建	漳州	2022	1.52126	1.10391	0.143965	1.07842	1.3969	0.142882	0.172479	22421976	1.10599	11.5844	0.222328	0.0194615	0.0461576	0.0921927	0.339557	60	0.0231434
29	福建	漳州	2023	1.6026	1.1385	0.162197	1.09742	1.45027	0.148733	0.172479	24103624	1.22416	11.6364	0.212807	0.020778	0.0423662	0.0911222	0.357586	52	0.0232038
29	福建	漳州	2024	1.68393	1.17308	0.174646	1.14553	1.6011	0.159972	0.172479	2.24599e+07	1.50983	11.6907	0.210571	0.0214748	0.0500255	0.0954861	0.380734	43	0.0234722
30	福建	泉州	2006	1	1	0.104654	0.685182	0.399775	0.0644789	0.187381	3945600	-1.0077	10.0837	0.233371	0.0101831	0.00626216	0.0558745	0.202983	28	0.0232209
30	福建	泉州	2007	1.11205	1.11205	0.0986907	0.741795	0.361537	0.0697029	0.187381	5879000	-0.846726	10.3013	0.221196	0.0112114	0.00820997	0.0568765	0.263215	28	0.0233141
30	福建	泉州	2008	1.26876	1.14092	0.0999361	0.743683	0.31426	0.0688607	0.187381	7303300	-0.874353	10.4629	0.211737	0.012412	0.00867071	0.0578535	0.239455	38	0.0233761
30	福建	泉州	2009	1.41019	1.11148	0.106066	0.794681	0.365895	0.0771462	0.187381	8228200	-0.656999	10.5656	0.178319	0.0131947	0.0117606	0.05965	0.299818	26	0.0234564
30	福建	泉州	2010	1.48559	1.05346	0.116102	0.793765	0.365177	0.0782011	0.187381	10827900	-0.653172	10.7186	0.20745	0.0139911	0.0130981	0.0625206	0.257545	33	0.0232586
30	福建	泉州	2011	1.46131	0.983663	0.114749	0.799269	0.31812	0.0774994	0.187381	14549000	-0.6702	10.8535	0.257428	0.0142658	0.012823	0.0693615	0.320016	47	0.023141
30	福建	泉州	2012	1.49156	1.0207	0.127586	0.782064	0.361466	0.0780325	0.187381	19634200	-0.687386	10.9562	0.329136	0.0139999	0.0130844	0.0740438	0.227103	39	0.0231814
30	福建	泉州	2013	1.56071	1.04636	0.132586	0.742408	0.468883	0.076551	0.187381	24435100	-0.739803	11.0602	0.335643	0.0140304	0.0139988	0.0784856	0.214642	33	0.0231872
30	福建	泉州	2014	1.63723	1.04903	0.126154	0.808794	0.451042	0.0834396	0.187381	28743300	-0.530631	11.1534	0.318298	0.0143211	0.0162281	0.0800716	0.258305	34	0.0232055
30	福建	泉州	2015	1.66875	1.01925	0.12145	0.831946	0.439297	0.0854089	0.187381	34781800	-0.463611	11.2073	0.265973	0.0144613	0.0239819	0.085414	0.198479	43	0.0232737
30	福建	泉州	2016	1.96459	1.17728	0.0604473	0.871774	0.429996	0.0828286	0.187381	37480100	-0.379759	11.2911	0.223288	0.0145832	0.025082	0.0863569	0.261516	53	0.0234278
30	福建	泉州	2017	1.19856	0.610084	0.0941147	0.891441	0.409739	0.0886846	0.187381	41238000	-0.30231	11.4215	0.196887	0.0144971	0.0246234	0.0803282	0.244956	48	0.0235715
30	福建	泉州	2018	1.23867	1.03347	0.11149	0.928415	0.379518	0.0944732	0.187381	46186560	-0.185184	11.5455	0.206358	0.0149251	0.0175426	0.070115	0.267922	48	0.0236722
30	福建	泉州	2019	1.31238	1.05951	0.108241	0.929768	0.376342	0.0941728	0.187381	49003940	-0.185331	11.6356	0.213262	0.0176209	0.0202442	0.0664648	0.308952	46	0.0237492
30	福建	泉州	2020	1.32134	1.00683	0.133229	0.920977	0.388668	0.0963685	0.187381	47827844	-0.187623	11.6501	0.195105	0.0198655	0.0259186	0.0709908	0.280975	34	0.0238841
30	福建	泉州	2021	1.46882	1.11161	0.134085	0.918088	0.426909	0.0971033	0.187381	25761400	-0.168548	11.7601	0.230528	0.0218633	0.014616	0.059142	0.379955	50	0.0239458
30	福建	泉州	2022	1.64305	1.11862	0.143965	0.908389	0.446994	0.0976037	0.187381	28403100	-0.179486	11.8227	0.226243	0.0232201	0.0231892	0.0667151	0.341719	42	0.0239004
30	福建	泉州	2023	1.74415	1.13991	0.162197	0.987244	0.467079	0.109907	0.187381	31669456	0.118874	11.828	0.213678	0.0249725	0.0221382	0.0698523	0.373162	44	0.0242555
30	福建	泉州	2024	1.84525	1.1612	0.174646	1.0001	0.487141	0.113465	0.187381	3.03594e+07	0.187027	11.8975	0.207334	0.0266546	0.0207287	0.064471	0.403481	34	0.0244236
31	福建	莆田	2006	1	1	0.104654	0.605023	0.552399	0.058626	0.297707	1214600	-1.16898	9.58442	0.332411	0.00538617	0.0177001	0.0627958	0.198776	15	0.0223131
31	福建	莆田	2007	1.03984	1.03984	0.0986907	0.738215	0.501282	0.0728713	0.297707	1844500	-0.755471	9.80581	0.31832	0.00606678	0.016984	0.0633832	0.184313	32	0.0224715
31	福建	莆田	2008	1.15658	1.11227	0.0999361	0.730287	0.773989	0.0790867	0.297707	2229800	-0.579678	9.96717	0.26628	0.00486021	0.0263854	0.0752084	0.269778	51	0.0224786
31	福建	莆田	2009	1.23447	1.06734	0.106066	0.8272	0.776704	0.091718	0.297707	2626200	-0.241428	10.1067	0.22871	0.00578147	0.0352179	0.089303	0.270985	37	0.0226878
31	福建	莆田	2010	1.22936	0.995863	0.116102	0.861001	0.829617	0.0983974	0.297707	3675400	-0.079061	10.3494	0.26688	0.006	0.0365054	0.091386	0.189418	53	0.0227211
31	福建	莆田	2011	1.20926	0.983649	0.114749	0.849576	0.804917	0.0962047	0.297707	6502100	-0.137469	10.5233	0.283309	0.0058793	0.0297179	0.0900642	0.210049	36	0.0227513
31	福建	莆田	2012	1.21343	1.00345	0.127586	0.83566	0.776015	0.0952753	0.297707	9007100	-0.196914	10.6399	0.229618	0.00597904	0.0331869	0.0969017	0.283858	26	0.0228756
31	福建	莆田	2013	1.16892	0.963314	0.132586	0.835007	0.744098	0.0949626	0.297707	11645400	-0.219055	10.7472	0.215445	0.00621085	0.0358984	0.105097	0.339329	53	0.0230504
31	福建	莆田	2014	1.12604	0.963317	0.126154	0.918331	0.690821	0.103006	0.297707	14236800	0.0218377	10.8471	0.20888	0.00688133	0.0308843	0.102434	0.333205	40	0.0232194
31	福建	莆田	2015	1.1215	0.99597	0.12145	0.911689	0.644448	0.100442	0.297707	17336000	-0.0387549	10.9085	0.180353	0.00703036	0.044184	0.114036	0.319134	42	0.0233118
31	福建	莆田	2016	1.27574	1.13753	0.0604473	0.975131	0.58375	0.0994203	0.297707	19380800	0.0878438	11.0259	0.160189	0.00686438	0.048496	0.110043	0.323228	46	0.0235406
31	福建	莆田	2017	1.2276	0.962267	0.0941147	1.00927	0.557337	0.106885	0.297707	22746500	0.210254	11.1408	0.171689	0.00660065	0.0430743	0.1071	0.366	71	0.0236599
31	福建	莆田	2018	1.17179	0.954537	0.11149	1.03452	0.535954	0.11147	0.297707	25614834	0.293822	11.2365	0.157277	0.00658211	0.0366551	0.0960331	0.255402	46	0.0237385
31	福建	莆田	2019	1.28129	1.09344	0.108241	0.974541	0.668616	0.107183	0.297707	27126110	0.184377	11.2903	0.154382	0.00788428	0.0364356	0.0926636	0.40896	47	0.0237295
31	福建	莆田	2020	1.26174	0.984742	0.133229	0.959389	0.690327	0.108844	0.297707	26502210	0.167268	11.3151	0.239037	0.00945109	0.0414484	0.0972961	0.272719	45	0.0238471
31	福建	莆田	2021	1.44494	1.14519	0.134085	0.980269	0.817596	0.114779	0.297707	18712400	0.333633	11.4187	0.234694	0.0111879	0.0319007	0.0843779	0.261104	44	0.023812
31	福建	莆田	2022	1.66659	1.1534	0.143965	0.934794	0.927223	0.11322	0.297707	19866700	0.266584	11.4441	0.228154	0.0123373	0.0421568	0.0927418	0.300101	42	0.0240624
31	福建	莆田	2023	1.79029	1.20312	0.162197	0.926205	1.03685	0.117153	0.297707	20462700	0.332005	11.4783	0.209651	0.0170705	0.0337073	0.086728	0.447662	41	0.0241278
31	福建	莆田	2024	1.91399	1.25283	0.174646	0.90632	1.18547	0.120029	0.297707	1.97823e+07	0.383331	11.5885	0.201278	0.0162845	0.0435409	0.0893184	0.525248	40.5	0.0244386
32	福建	宁德	2006	1	1	0.104654	0.894601	1.51519	0.118839	0.219429	1507500	0.535178	9.43514	0.09607	0.00138862	0.0472357	0.0905792	0.179253	19	0.0220256
32	福建	宁德	2007	1.01643	1.01643	0.0986907	1.08499	1.54374	0.142126	0.219429	1716700	1.20342	9.67795	0.102112	0.00151354	0.0496693	0.0935782	0.212865	25	0.0220709
32	福建	宁德	2008	1.04656	1.02965	0.0999361	1.09132	1.50384	0.142017	0.219429	2262000	1.19648	9.84949	0.11324	0.00228566	0.0564409	0.101124	0.272065	47	0.022039
32	福建	宁德	2009	1.08784	1.03944	0.106066	1.17406	1.61853	0.155806	0.219429	2731600	1.56914	9.99472	0.0851203	0.00263404	0.0669256	0.111031	0.218312	39	0.0223909
32	福建	宁德	2010	1.12615	1.03521	0.116102	1.07299	1.69431	0.146602	0.219429	3560500	1.28691	10.1999	0.108021	0.00286251	0.0607258	0.114082	0.281987	41	0.0221533
32	福建	宁德	2011	1.1255	0.999427	0.114749	1.08091	1.6779	0.146985	0.219429	4463000	1.30082	10.396	0.11285	0.00291944	0.0634076	0.121018	0.208425	26	0.0218214
32	福建	宁德	2012	0.981804	0.872327	0.127586	1.10576	1.23404	0.140085	0.219429	6137200	1.06671	10.5356	0.14123	0.00301718	0.0653347	0.129839	0.200121	37	0.0216469
32	福建	宁德	2013	0.980005	0.998168	0.132586	1.14429	1.4341	0.150544	0.219429	9100200	1.35049	10.676	0.158934	0.00313242	0.0766508	0.146552	0.210806	34	0.021575
32	福建	宁德	2014	0.981236	1.00126	0.126154	1.22349	1.34709	0.157212	0.219429	11311800	1.55226	10.7736	0.173966	0.00332256	0.0712146	0.140977	0.250883	44	0.0215475
32	福建	宁德	2015	0.949869	0.968034	0.12145	1.15443	1.40732	0.149776	0.219429	12584800	1.35704	10.8753	0.16626	0.00342326	0.090277	0.155896	0.302222	37	0.0216582
32	福建	宁德	2016	0.961393	1.01213	0.0604473	1.10576	1.71015	0.144439	0.219429	12251500	1.3692	10.9174	0.153181	0.0034495	0.0993506	0.159802	0.229722	58	0.0216922
32	福建	宁德	2017	0.685585	0.713116	0.0941147	1.04435	1.87606	0.145196	0.219429	12874200	1.30707	11.037	0.160349	0.00365016	0.0978746	0.155742	0.403336	67	0.0221996
32	福建	宁德	2018	0.793485	1.15738	0.11149	0.961469	1.85473	0.136575	0.219429	14110123	1.02062	11.1707	0.161255	0.00396828	0.0813884	0.136263	0.271437	47	0.0223159
32	福建	宁德	2019	0.864507	1.08951	0.108241	0.983144	1.78743	0.137102	0.219429	14942620	1.04252	11.2719	0.174017	0.00468397	0.0867309	0.13845	0.272898	38	0.0223579
32	福建	宁德	2020	0.930866	1.07676	0.133229	0.959909	1.87441	0.139459	0.219429	15047218	1.04609	11.317	0.19611	0.00545157	0.0847678	0.138035	0.27381	41	0.0223785
32	福建	宁德	2021	1.15061	1.23606	0.134085	1.01111	2.12594	0.152305	0.219429	9617700	1.40827	11.5079	0.289129	0.00624222	0.0593484	0.109774	0.275572	53	0.0221329
32	福建	宁德	2022	1.47233	1.2796	0.143965	1.02349	2.28356	0.159051	0.219429	9434964	1.57476	11.6562	0.356897	0.00691952	0.0562333	0.102209	0.347948	48	0.0222532
32	福建	宁德	2023	1.64204	1.31016	0.162197	1.1038	2.44117	0.17508	0.219429	7312097	1.97995	11.7002	0.392971	0.00670162	0.0512269	0.106353	0.487676	32	0.0222823
32	福建	宁德	2024	1.81175	1.34072	0.174646	1.13536	2.58263	0.184055	0.219429	6.5241e+06	2.20202	11.7216	0.378474	0.00650458	0.0504947	0.115744	0.553939	21	0.0226365
33	广东	广州	2006	1	1	0.242023	0.623018	0.977247	0.0880107	0.641203	16963824	-0.690115	11.0198	0.835055	0.0621518	0.0130952	0.0832583	0.264995	20	0.0255311
33	广东	广州	2007	1.05713	1.05713	0.260085	0.653526	0.929707	0.0926439	0.641203	18633437	-0.607428	11.1218	0.784751	0.0652525	0.0140283	0.0875809	0.252767	23	0.0256377
33	广东	广州	2008	1.10887	1.04895	0.232391	0.654453	0.910047	0.0889789	0.641203	21055373	-0.6395	11.2122	0.688649	0.0660025	0.0110827	0.0863934	0.276219	42	0.0257195
33	广东	广州	2009	1.20955	1.09079	0.253652	0.661369	0.880019	0.0915599	0.641203	26598516	-0.622198	11.2514	0.573235	0.067062	0.00955001	0.0864414	0.273943	43	0.0258967
33	广东	广州	2010	1.28405	1.06159	0.239066	0.679817	0.897006	0.0925288	0.641203	32635731	-0.557373	11.3353	0.66016	0.0664013	0.00983679	0.0918476	0.244512	41	0.0258738
33	广东	广州	2011	1.25752	0.979339	0.236693	0.633282	0.856904	0.0855298	0.641203	34122005	-0.748104	11.4437	0.597276	0.0665609	0.0160618	0.0940326	0.39938	43	0.0259707
33	广东	广州	2012	1.3184	1.04842	0.229255	0.621334	0.879544	0.083776	0.641203	37583868	-0.777782	11.4801	0.539948	0.0663503	0.0176122	0.0980917	0.333149	65	0.0261825
33	广东	广州	2013	1.45307	1.10214	0.239378	0.650631	0.790287	0.0862472	0.641203	44545508	-0.736069	11.535	0.489253	0.0667725	0.0162341	0.0920992	0.392908	32	0.0262056
33	广东	广州	2014	1.50004	1.03233	0.21746	0.683175	0.809472	0.0881285	0.641203	48895026	-0.626856	11.5668	0.497143	0.066663	0.0119683	0.0890075	0.455303	35	0.0262509
33	广东	广州	2015	1.6002	1.06677	0.254611	0.637111	0.774482	0.085987	0.641203	54059522	-0.78267	11.5969	0.480639	0.0654078	0.0218045	0.0995955	0.403999	37	0.0264316
33	广东	广州	2016	1.64099	1.02549	0.312267	0.628803	0.970698	0.096845	0.641203	57035860	-0.622703	11.6135	0.462781	0.0629941	0.02964	0.104729	0.456164	46	0.0266349
33	广东	广州	2017	1.90352	1.15998	0.253309	0.675269	0.722304	0.0891478	0.641203	59198316	-0.691701	11.6422	0.48672	0.0611208	0.0326731	0.110006	0.464539	39	0.0268088
33	广东	广州	2018	2.14496	1.12684	0.253946	0.755296	0.726479	0.0991056	0.641203	59384003	-0.414258	11.6682	0.467907	0.0604187	0.0415171	0.119328	0.376688	43	0.0268726
33	广东	广州	2019	1.58509	0.738982	0.262975	0.81401	0.94597	0.113007	0.641203	69202087	-0.0440053	11.7769	0.419555	0.0623057	0.0489119	0.120166	0.540082	45	0.0270628
33	广东	广州	2020	1.75143	1.10494	0.318891	0.815896	0.856605	0.117536	0.641203	76110959	-0.0619809	11.8039	0.378637	0.0697504	0.0490595	0.117782	0.54797	20	0.0270925
33	广东	广州	2021	1.96724	1.12322	0.315169	0.826899	0.886296	0.119206	0.641203	85027452	-0.00511127	11.9187	0.382753	0.0750943	0.0402803	0.107038	0.373897	37	0.0270467
33	广东	广州	2022	2.82504	1.43604	0.383504	0.863206	0.872645	0.13136	0.641203	83212834	0.160064	11.9441	0.380718	0.0794955	0.0404865	0.104826	0.359063	55	0.0271034
33	广东	广州	2023	2.99506	1.51335	0.422023	0.89159	0.858994	0.139024	0.641203	86208496	0.275858	11.9906	0.36048	0.0780057	0.0338187	0.0978942	0.438445	56	0.0272291
33	广东	广州	2024	3.16508	1.59065	0.460626	0.921962	0.895291	0.14823	0.641203	9.30531e+07	0.435517	12.0047	0.362148	0.0748538	0.0265109	0.0894997	0.465813	53	0.0272582
34	广东	深圳	2006	1	1	0.242023	0.708074	0.972482	0.0982769	0.457554	12736700	-0.402559	11.1067	3.26105	0.00587992	0.0121558	0.0984696	0.274476	28	0.0247209
34	广东	深圳	2007	1.04783	1.04783	0.260085	0.692901	1.07555	0.101216	0.457554	13450000	-0.364653	11.2175	3.22015	0.00645681	0.0102964	0.107216	0.282164	35	0.024965
34	广东	深圳	2008	1.12953	1.07798	0.232391	0.696203	1.20196	0.10161	0.457554	14676000	-0.280408	11.3036	2.69133	0.00677736	0.0115626	0.114962	0.283617	65	0.0250531
34	广东	深圳	2009	1.16489	1.0313	0.253652	0.687579	1.09738	0.10037	0.457554	17091500	-0.371498	11.3196	2.25023	0.00672878	0.0146342	0.122034	0.408213	41	0.0253173
34	广东	深圳	2010	1.24649	1.07005	0.239066	0.678261	1.19164	0.099941	0.457554	19447000	-0.344466	11.4833	2.33122	0.00649094	0.0158158	0.125739	0.328431	58	0.0252924
34	广东	深圳	2011	1.36208	1.09273	0.236693	0.689785	1.38127	0.105961	0.457554	20609200	-0.166341	11.5631	2.26517	0.00623399	0.0212573	0.134711	0.353373	62	0.0252345
34	广东	深圳	2012	1.50689	1.10631	0.229255	0.667901	1.31245	0.100634	0.457554	23144300	-0.297764	11.6207	2.21241	0.00631935	0.00652643	0.117796	0.400036	36	0.0254432
34	广东	深圳	2013	1.4455	0.959265	0.239378	0.663859	0.783848	0.0876968	0.457554	24902000	-0.695568	11.705	2.185	0.00655448	-0.00265389	0.110989	0.359086	55	0.0256168
34	广东	深圳	2014	1.64916	1.14089	0.21746	0.697621	0.648225	0.0857324	0.457554	27174200	-0.696851	11.7554	1.78388	0.00665276	0.0049859	0.128975	0.363494	56	0.0256871
34	广东	深圳	2015	2.58059	1.56479	0.254611	0.561607	0.641524	0.073334	0.457554	32983100	-1.13955	11.7825	1.49473	0.00642811	0.0431104	0.191013	0.568796	54	0.0258226
34	广东	深圳	2016	1.74439	0.675967	0.312267	0.590398	0.619304	0.0830872	0.457554	40781600	-1.01441	11.8374	1.27941	0.00614458	0.0519464	0.203572	0.342994	59	0.0259679
34	广东	深圳	2017	2.60169	1.49145	0.253309	0.636509	0.536889	0.0796293	0.457554	51473200	-0.961685	11.8959	1.20112	0.00609219	0.0541948	0.197326	0.448261	44	0.0259723
34	广东	深圳	2018	2.89137	1.11134	0.253946	0.702824	0.906381	0.0973384	0.457554	62076680	-0.460579	11.9293	1.18836	0.00623178	0.0294517	0.169498	0.311175	49	0.0260259
34	广东	深圳	2019	2.5838	0.893627	0.262975	0.703916	0.997752	0.100896	0.457554	73747096	-0.382421	11.9692	1.10297	0.00661915	0.028873	0.168668	0.446102	44	0.0261274
34	广东	深圳	2020	2.65844	1.02889	0.318891	0.663447	1.12129	0.105745	0.457554	79794360	-0.387652	11.9667	1.09546	0.0077229	0.0115397	0.1505	0.480805	36	0.026242
34	广东	深圳	2021	2.58697	0.973114	0.315169	0.688554	1.3078	0.113184	0.457554	82746752	-0.166359	12.0686	1.14781	0.00821085	0.0101401	0.148287	0.350735	56	0.0262183
34	广东	深圳	2022	2.68764	1.03892	0.383504	0.67815	1.43195	0.123188	0.457554	89697480	-0.0589735	12.1222	1.1332	0.00879095	0.0303238	0.153857	0.56353	47	0.0261937
34	广东	深圳	2023	2.63671	1.02081	0.422023	0.692594	1.5561	0.132705	0.457554	99564200	0.111182	12.1783	1.1185	0.00904104	0.0259862	0.144831	0.879506	36	0.0262248
34	广东	深圳	2024	2.58578	1.0027	0.460626	0.690945	1.7343	0.141661	0.457554	1.09541e+08	0.266361	12.2287	1.22407	0.00933878	0.0213764	0.127735	1.12723	50	0.0262062
35	广东	珠海	2006	1	1	0.242023	0.429327	0.545137	0.053203	0.590028	2571608	-1.67304	10.8527	3.50373	0.0456378	0.013688	0.0944096	0.227244	30	0.0237851
35	广东	珠海	2007	1.10886	1.10886	0.260085	0.49223	0.703358	0.0671021	0.590028	3450467	-1.32708	11.0141	3.38588	0.0536578	0.00781852	0.0925043	0.249842	33	0.0238879
35	广东	珠海	2008	1.0703	0.965224	0.232391	0.475208	0.658452	0.0605933	0.590028	3767575	-1.43928	11.1066	3.23111	0.0588029	0.013272	0.104984	0.275366	36	0.024017
35	广东	珠海	2009	1.10399	1.03148	0.253652	0.504672	0.761836	0.0693708	0.590028	4105052	-1.246	11.1353	2.41992	0.0658737	0.0188292	0.114782	0.221436	48	0.0242998
35	广东	珠海	2010	1.16233	1.05284	0.239066	0.535722	0.813333	0.0727694	0.590028	5015458	-1.11248	11.2837	2.37039	0.0692815	0.0337271	0.134015	0.234353	43	0.024116
35	广东	珠海	2011	1.19306	1.02644	0.236693	0.549732	0.596029	0.0685934	0.590028	6373858	-1.22727	11.3905	2.2839	0.0708714	0.0321628	0.130384	0.281745	56	0.0242106
35	广东	珠海	2012	1.21915	1.02187	0.229255	0.56187	0.675346	0.0712441	0.590028	7876184	-1.13253	11.4221	1.82083	0.0710449	0.0313199	0.133993	0.301763	81	0.0245412
35	广东	珠海	2013	1.21976	1.0005	0.239378	0.50672	0.694961	0.0662096	0.590028	9187674	-1.29918	11.5054	1.88381	0.0708398	0.0324731	0.141522	0.223469	65	0.0246478
35	广东	珠海	2014	1.27092	1.04195	0.21746	0.530828	0.704845	0.0668206	0.590028	11350492	-1.22572	11.5882	1.68177	0.0708459	0.0256812	0.137342	0.307545	44	0.0247445
35	广东	珠海	2015	1.35803	1.06854	0.254611	0.555843	0.751865	0.075477	0.590028	13051412	-1.07754	11.6683	1.33926	0.0695652	0.0536016	0.175395	0.218432	73	0.0248555
35	广东	珠海	2016	1.51813	1.11789	0.312267	0.688267	0.654603	0.0959522	0.590028	13897545	-0.65333	11.7372	1.12975	0.0681835	0.0508805	0.170088	0.351672	65	0.0250699
35	广东	珠海	2017	1.63528	1.07717	0.253309	0.722585	0.613505	0.0921199	0.590028	16620214	-0.610358	11.865	1.01489	0.0660946	0.0609784	0.167771	0.30259	33	0.025251
35	广东	珠海	2018	1.62776	0.995401	0.253946	0.728251	0.579121	0.092	0.590028	20058936	-0.615963	11.8888	1.01483	0.0629049	0.0749352	0.177979	0.338117	40	0.0251535
35	广东	珠海	2019	1.76301	1.08309	0.262975	0.718253	0.427352	0.0879292	0.590028	19718790	-0.755847	11.903	0.845378	0.0597354	0.0787549	0.178774	0.270668	37	0.0252499
35	广东	珠海	2020	1.6643	0.944009	0.318891	0.823421	0.378233	0.106112	0.590028	22304100	-0.390556	11.875	0.774411	0.0586945	0.0848402	0.192601	0.307532	21	0.0255513
35	广东	珠海	2021	1.79541	1.07877	0.315169	0.857348	0.413716	0.110732	0.590028	21612672	-0.250944	11.97	0.849457	0.055869	0.0868754	0.201913	0.364755	30	0.0254839
35	广东	珠海	2022	1.94474	1.08317	0.383504	0.883403	0.431863	0.122454	0.590028	19710756	-0.0972985	12.0095	0.768417	0.0559458	0.0778147	0.185282	0.378791	35	0.0252517
35	广东	珠海	2023	2.02398	1.10512	0.422023	0.920583	0.45001	0.132013	0.590028	17128646	0.0721491	12.042	0.700969	0.052613	0.0447296	0.158712	0.428657	35	0.0252482
35	广东	珠海	2024	2.10323	1.12706	0.460626	0.965944	0.432251	0.141654	0.590028	1.66633e+07	0.243065	12.0887	0.723837	0.0502333	0.0390305	0.145115	0.453768	45	0.0254183
36	广东	汕头	2006	1	1	0.242023	0.366259	1.21186	0.0627028	0.384698	1767700	-1.39503	9.57575	0.599239	0.00168104	0.0347173	0.0832242	0.261978	24	0.0234986
36	广东	汕头	2007	1.06127	1.06127	0.260085	0.386384	1.24311	0.0681006	0.384698	2069600	-1.28952	9.7062	0.558367	0.00167722	0.036534	0.0875976	0.189583	27	0.0235238
36	广东	汕头	2008	1.15194	1.08543	0.232391	0.312435	1.23613	0.0556168	0.384698	2613600	-1.56846	9.82401	0.459999	0.00167062	0.0380797	0.0919445	0.26418	34	0.0233638
36	广东	汕头	2009	1.18612	1.02967	0.253652	0.351478	1.24789	0.0632004	0.384698	2919000	-1.41025	9.87797	0.404628	0.00174323	0.0400988	0.0976185	0.25437	28	0.0234768
36	广东	汕头	2010	1.23432	1.04064	0.239066	0.35318	1.22131	0.0609997	0.384698	3616800	-1.43501	9.94568	0.442877	0.00759794	0.0435798	0.108115	0.298888	25	0.0236081
36	广东	汕头	2011	1.13047	0.915863	0.236693	0.366101	1.21056	0.0620202	0.384698	4387400	-1.40052	10.0665	0.446695	0.00794798	0.0520028	0.119352	0.272903	21	0.0237948
36	广东	汕头	2012	1.0207	0.902899	0.229255	0.355282	0.866033	0.0509306	0.384698	6119200	-1.69829	10.1734	0.392126	0.00794942	0.0540498	0.122037	0.285192	26	0.023798
36	广东	汕头	2013	1.10661	1.08417	0.239378	0.384138	0.964457	0.0581904	0.384698	7809000	-1.51908	10.2734	0.364336	0.00902031	0.0504275	0.121854	0.284105	21	0.0237821
36	广东	汕头	2014	0.979022	0.884706	0.21746	0.402644	1.02101	0.0593214	0.384698	10027300	-1.43022	10.3548	0.343309	0.0092902	0.0524679	0.124941	0.347669	29	0.0238034
36	广东	汕头	2015	1.04118	1.06349	0.254611	0.41964	1.06089	0.066814	0.384698	12743200	-1.31478	10.4419	0.309322	0.00755104	0.0800844	0.150295	0.217343	34	0.0240073
36	广东	汕头	2016	1.03507	0.994126	0.312267	0.417221	0.971203	0.0710144	0.384698	15795300	-1.34642	10.5554	0.270033	0.00728324	0.0756383	0.140998	0.256272	41	0.0241781
36	广东	汕头	2017	0.998015	0.964203	0.253309	0.468117	0.827865	0.066569	0.384698	20064000	-1.32245	10.6748	0.251151	0.00708663	0.0766672	0.140037	0.271155	25	0.0243396
36	广东	汕头	2018	1.01402	1.01604	0.253946	0.549487	0.824721	0.076502	0.384698	23924314	-1.04583	10.7283	0.222823	0.00698153	0.0781359	0.130679	0.33139	41	0.0242367
36	广东	汕头	2019	1.09173	1.07664	0.262975	0.566069	1.15262	0.0880543	0.384698	27010550	-0.739466	10.798	0.22378	0.00770057	0.0923946	0.143841	0.28982	30	0.0243308
36	广东	汕头	2020	1.06152	0.972331	0.318891	0.54011	1.40477	0.0979939	0.384698	25281874	-0.599777	10.8025	0.25012	0.00893944	0.104923	0.157967	0.318917	28	0.0242045
36	广东	汕头	2021	1.06688	1.00505	0.315169	0.559272	1.52665	0.10304	0.384698	18885560	-0.446702	10.8843	0.250717	0.010813	0.0903758	0.139993	0.356752	40	0.0243216
36	广东	汕头	2022	1.07914	1.01149	0.383504	0.560495	1.57861	0.112601	0.384698	16147154	-0.352996	10.9107	0.258115	0.0118371	0.0829648	0.125138	0.307839	51	0.0243036
36	广东	汕头	2023	1.09542	1.01035	0.422023	0.574088	1.63056	0.120151	0.384698	17632692	-0.239223	10.9478	0.20329	0.0127395	0.0757966	0.11793	0.277105	31	0.0242779
36	广东	汕头	2024	1.1117	1.00922	0.460626	0.579397	1.88169	0.131839	0.384698	1.67828e+07	-0.00621759	10.9476	0.177735	0.0128939	0.0775986	0.121772	0.26916	43	0.0249564
37	广东	惠州	2006	1	1	0.242023	0.46557	0.540121	0.0575004	0.238146	3087813	-1.55272	10.0868	1.81806	0.00217362	0.0231811	0.0709291	0.193545	47	0.0227117
37	广东	惠州	2007	0.990821	0.990821	0.260085	0.496767	0.46579	0.0615264	0.238146	4869094	-1.48752	10.2344	1.63461	0.00200541	0.0213959	0.0767221	0.199615	51	0.0228705
37	广东	惠州	2008	1.09079	1.1009	0.232391	0.505825	0.598518	0.0627865	0.238146	5887368	-1.3789	10.3507	1.57753	0.00221808	0.0215575	0.0811748	0.260974	53	0.0229326
37	广东	惠州	2009	1.13477	1.04032	0.253652	0.533191	0.556144	0.0675469	0.238146	7589682	-1.30075	10.3883	1.41351	0.00276685	0.0234806	0.0953591	0.287289	56	0.0231303
37	广东	惠州	2010	1.21546	1.07111	0.239066	0.537756	0.645817	0.0686956	0.238146	8940191	-1.2296	10.531	1.34461	0.0043557	0.0314523	0.107591	0.206761	29	0.0229056
37	广东	惠州	2011	1.202	0.98893	0.236693	0.556944	0.710161	0.0724191	0.238146	10252067	-1.11805	10.6724	1.20515	0.00456473	0.0309498	0.109228	0.261973	43	0.0230045
37	广东	惠州	2012	1.25063	1.04045	0.229255	0.598601	0.820623	0.079479	0.238146	12086803	-0.899222	10.7521	1.32827	0.00482679	0.0311164	0.116508	0.273725	27	0.023104
37	广东	惠州	2013	1.34157	1.07272	0.239378	0.611948	0.969677	0.0861509	0.238146	14013040	-0.735582	10.846	1.32904	0.00518405	0.0292092	0.122748	0.260262	45	0.023232
37	广东	惠州	2014	1.36913	1.02054	0.21746	0.691148	0.880649	0.0909389	0.238146	16067089	-0.546847	10.9158	1.23334	0.00561377	0.024406	0.126041	0.321899	51	0.0232872
37	广东	惠州	2015	1.36536	0.997247	0.254611	0.682169	0.995165	0.0971847	0.238146	18639306	-0.46501	10.9357	1.09554	0.00620883	0.0472619	0.157292	0.197469	42	0.0234086
37	广东	惠州	2016	1.36575	1.00028	0.312267	0.694238	0.988149	0.105288	0.238146	20397056	-0.38584	10.9971	0.912344	0.00661578	0.0439853	0.15153	0.324101	70	0.0234981
37	广东	惠州	2017	1.2244	0.896502	0.253309	0.752293	0.992824	0.105536	0.238146	22348768	-0.227731	11.0892	0.908778	0.00685261	0.0440312	0.147904	0.39003	83	0.0238135
37	广东	惠州	2018	1.23007	1.00464	0.253946	0.796424	1.00503	0.111316	0.238146	18225581	-0.067188	11.1341	0.835712	0.00752805	0.0377711	0.135942	0.456902	96	0.023819
37	广东	惠州	2019	1.09956	0.893895	0.262975	0.908697	0.860183	0.122359	0.238146	21027821	0.216499	11.1592	0.647577	0.00823133	0.0510383	0.146642	0.292983	46	0.0238668
37	广东	惠州	2020	1.07633	0.978874	0.318891	1.00238	0.841437	0.139923	0.238146	24396723	0.564996	11.1665	0.579341	0.0107271	0.0525523	0.148789	0.323455	30	0.0239969
37	广东	惠州	2021	1.23087	1.14359	0.315169	1.12157	0.898888	0.155524	0.238146	29724478	1.01267	11.3263	0.605993	0.0115242	0.0413109	0.131791	0.300508	42	0.0236112
37	广东	惠州	2022	1.36724	1.11079	0.383504	1.16774	0.912448	0.169585	0.238146	32340232	1.23176	11.3993	0.578262	0.0121728	0.0465347	0.128332	0.341216	70	0.0234778
37	广东	惠州	2023	1.40154	1.13733	0.422023	1.13402	0.926009	0.170364	0.238146	34054264	1.15516	11.4388	0.604862	0.011046	0.0449369	0.12886	0.457548	58	0.0235059
37	广东	惠州	2024	1.43583	1.16387	0.460626	1.21913	0.913473	0.184996	0.238146	3.86403e+07	1.46597	11.5161	0.641667	0.0107775	0.037043	0.114621	0.471338	59	0.0237359
38	广东	汕尾	2006	1	1	0.242023	0.402137	0.607032	0.0514789	0.18763	1334800	-1.72025	9.03737	0.514585	0.00144145	0.0632661	0.101926	0.171666	12	0.0215606
38	广东	汕尾	2007	0.385619	0.385619	0.260085	0.371311	0.646072	0.0508544	0.18763	1750800	-1.78333	9.20954	0.577062	0.00123957	0.0656667	0.107804	0.243968	17	0.0217042
38	广东	汕尾	2008	0.341292	0.88505	0.232391	0.282807	0.660276	0.0371396	0.18763	2062700	-2.09638	9.38159	0.396432	0.00132813	0.0703621	0.115836	0.27266	10	0.0218478
38	广东	汕尾	2009	0.355252	1.0409	0.253652	0.352287	0.625311	0.0472352	0.18763	2894300	-1.86862	9.48138	0.310321	0.00131755	0.0871539	0.138432	0.231645	32	0.0221143
38	广东	汕尾	2010	0.281485	0.792353	0.239066	0.398227	0.600477	0.0504829	0.18763	3669900	-1.74069	9.67005	0.305009	0.00159149	0.0665446	0.124189	0.303159	24	0.0223886
38	广东	汕尾	2011	0.414239	1.47162	0.236693	0.42454	0.597272	0.053334	0.18763	3296500	-1.65479	9.8308	0.304923	0.00154272	0.0785402	0.140207	0.216208	30	0.0221535
38	广东	汕尾	2012	0.495243	1.19555	0.229255	0.451808	0.544363	0.0544208	0.18763	3915600	-1.60621	9.9557	0.300975	0.00159061	0.078672	0.147598	0.275975	26	0.0221882
38	广东	汕尾	2013	0.34831	0.70331	0.239378	0.466202	0.459683	0.0551897	0.18763	4620900	-1.61211	10.0917	0.381178	0.00162253	0.0842797	0.155275	0.23711	26	0.0225863
38	广东	汕尾	2014	0.305039	0.87577	0.21746	0.494019	0.472454	0.0563282	0.18763	5009700	-1.52383	10.1704	0.332466	0.00182446	0.103681	0.171179	0.226196	25	0.0227742
38	广东	汕尾	2015	0.33579	1.10081	0.254611	0.485138	0.443855	0.0588934	0.18763	5852000	-1.54766	10.2284	0.260067	0.00203061	0.240097	0.277692	0.288057	21	0.0228626
38	广东	汕尾	2016	0.492674	1.46721	0.312267	0.473077	0.42336	0.0637012	0.18763	6524500	-1.56105	10.3321	0.253731	0.0021341	0.208671	0.245144	0.303495	3	0.0230266
38	广东	汕尾	2017	0.371673	0.7544	0.253309	0.487312	0.468312	0.0596362	0.18763	6693300	-1.52307	10.41	0.218848	0.00233926	0.205435	0.246085	0.358187	50	0.0233938
38	广东	汕尾	2018	0.3874	1.04231	0.253946	0.452329	0.637173	0.0597956	0.18763	7.80773e+06	-1.51724	10.5218	0.177227	0.00256111	0.208804	0.250906	0.225472	70	0.0236477
38	广东	汕尾	2019	0.430801	1.11203	0.262975	0.519571	0.402278	0.0630144	0.18763	8986702	-1.45436	10.5974	0.156005	0.00279974	0.219713	0.259155	0.308588	33	0.0235869
38	广东	汕尾	2020	0.404101	0.938022	0.318891	0.6339	0.431002	0.0843244	0.18763	10244840	-1.00006	10.6378	0.151484	0.00306344	0.198179	0.239532	0.248813	23	0.0234754
38	广东	汕尾	2021	0.411213	1.0176	0.315169	0.772875	0.356789	0.098945	0.18763	11976218	-0.5822	10.7756	0.157146	0.0033062	0.176482	0.217535	0.375341	53	0.0235862
38	广东	汕尾	2022	0.418874	1.01863	0.383504	0.927163	0.269502	0.123609	0.18763	11234890	-0.0678006	10.8118	0.122742	0.00359704	0.176919	0.222986	0.243862	60	0.0233673
38	广东	汕尾	2023	0.426742	1.01271	0.422023	0.994428	0.182215	0.134123	0.18763	10864139	0.126517	10.8812	0.143869	0.00389423	0.139722	0.186212	0.143987	40	0.0233683
38	广东	汕尾	2024	0.434611	1.00679	0.460626	1.16549	0.144389	0.158601	0.18763	1.16574e+07	0.712761	10.9253	0.124352	0.00421395	0.13919	0.188673	0.141787	41	0.0243693
39	广东	东莞	2006	1	1	0.242023	0.514182	2.88158	0.123853	0.517051	7054500	0.347946	10.5619	2.53448	0.00320932	0.00715391	0.0558298	0.23863	37	0.024141
39	广东	东莞	2007	1.12999	1.12999	0.260085	0.574323	2.83118	0.132032	0.517051	8412100	0.529924	10.705	2.54252	0.00351148	0.00208054	0.060413	0.232535	27	0.0243227
39	广东	东莞	2008	1.42712	1.26295	0.232391	0.546639	2.74921	0.123265	0.517051	9443400	0.353784	10.8205	2.09523	0.00381775	0.00240651	0.0581172	0.264352	50	0.0247209
39	广东	东莞	2009	1.46908	1.0294	0.253652	0.582319	2.4076	0.12132	0.517051	10940800	0.238742	10.7763	1.70912	0.00432424	0.000389566	0.0618155	0.306816	24	0.0250808
39	广东	东莞	2010	1.63114	1.11032	0.239066	0.560257	2.70452	0.124564	0.517051	11149800	0.372274	10.8736	1.89269	0.0046558	0.00276291	0.0667837	0.29067	34	0.0245986
39	广东	东莞	2011	2.10186	1.28858	0.236693	0.562243	3.21141	0.137605	0.517051	10793100	0.752751	10.9137	1.81392	0.00514224	0.00806938	0.0730893	0.19791	41	0.0248315
39	广东	东莞	2012	2.09711	0.997743	0.229255	0.56465	3.22908	0.137476	0.517051	11803500	0.768517	10.9173	1.78907	0.00566618	0.00574228	0.0756713	0.279801	41	0.0250321
39	广东	东莞	2013	0.619728	0.295514	0.239378	0.553166	0.390398	0.0640242	0.517051	13839400	-1.36582	10.9961	1.65145	0.00632475	0.00616141	0.0774608	0.264412	22	0.0247381
39	广东	东莞	2014	0.643517	1.03839	0.21746	0.59661	0.391102	0.06676	0.517051	14271100	-1.23299	11.0351	1.61688	0.00701656	0.000399963	0.0741206	0.264243	48	0.0246646
39	广东	东莞	2015	0.689599	1.07161	0.254611	0.599962	0.417652	0.0722424	0.517051	14465200	-1.17411	11.1077	1.56682	0.0114675	0.00949281	0.0872035	0.295739	32	0.0247206
39	广东	东莞	2016	0.711067	1.03113	0.312267	0.57173	0.339341	0.0735833	0.517051	15574600	-1.28567	11.1764	1.57633	0.0110766	0.00751084	0.0825364	0.227376	43	0.024622
39	广东	东莞	2017	0.724168	1.01842	0.253309	0.57917	0.290075	0.0662573	0.517051	17128300	-1.34073	11.2621	1.51407	0.0114057	0.00935464	0.0826377	0.222049	54	0.0244769
39	广东	东莞	2018	0.762101	1.05238	0.253946	0.595627	0.303381	0.0686859	0.517051	18121742	-1.27408	11.3443	1.52587	0.0116317	0.0130974	0.0867993	0.326134	53	0.0243162
39	广东	东莞	2019	0.771836	1.01277	0.262975	0.622897	0.200277	0.0704229	0.517051	21293046	-1.25038	11.4144	1.46069	0.0119023	0.0200273	0.0910887	0.445539	46	0.0243462
39	广东	东莞	2020	0.763858	0.989663	0.318891	0.68939	0.191219	0.0849152	0.517051	24061142	-0.987765	11.4411	1.35807	0.0129039	0.0149203	0.0861274	0.404155	19	0.0242651
39	广东	东莞	2021	0.809299	1.05949	0.315169	0.733672	0.200209	0.0901165	0.517051	26034156	-0.83234	11.5497	1.38967	0.0132236	0.0103336	0.0807315	0.392931	49	0.0241191
39	广东	东莞	2022	0.86244	1.06566	0.383504	0.700915	0.199423	0.094166	0.517051	26242430	-0.893993	11.599	1.24251	0.0146533	0.00839248	0.0757407	0.34175	44	0.0241462
39	广东	东莞	2023	0.887524	1.06898	0.422023	0.689518	0.198636	0.0973032	0.517051	26950976	-0.904809	11.5999	1.12294	0.0151323	0.00880959	0.0791959	0.388517	24	0.0242729
39	广东	东莞	2024	0.912609	1.0723	0.460626	0.711011	0.184893	0.104133	0.517051	2.92256e+07	-0.812602	11.663	1.13013	0.0160915	0.00999336	0.0742679	0.408103	21	0.0244001
40	广东	中山	2006	1	1	0.242023	0.430468	1.34728	0.0740395	0.804316	3469510	-1.07499	10.6396	1.73273	0.0096041	-0.00196285	0.0604752	0.200835	53	0.0232546
40	广东	中山	2007	1.07296	1.07296	0.260085	0.474689	1.39393	0.082778	0.804316	3992242	-0.875612	10.7743	1.46088	0.0119741	0.00127659	0.0683601	0.238164	26	0.0234155
40	广东	中山	2008	1.10912	1.0337	0.232391	0.466481	1.51452	0.081616	0.804316	4449541	-0.835064	10.8641	1.22102	0.0118181	0.00074351	0.0686842	0.235451	38	0.0235214
40	广东	中山	2009	1.20789	1.08905	0.253652	0.529051	1.34293	0.0873423	0.804316	5456051	-0.732149	10.8791	1.06244	0.0116676	0.00474204	0.0749388	0.221856	34	0.0236395
40	广东	中山	2010	1.20821	1.00026	0.239066	0.510903	1.28109	0.0818071	0.804316	6603747	-0.850958	10.9667	1.16485	0.0112995	0.0035771	0.0806476	0.299269	40	0.0235512
40	广东	中山	2011	1.30614	1.08106	0.236693	0.527602	1.26795	0.0832274	0.804316	7669539	-0.805315	11.0468	1.05023	0.0108407	0.00449452	0.0916106	0.232047	40	0.0237422
40	广东	中山	2012	1.35042	1.0339	0.229255	0.55414	1.25968	0.0853772	0.804316	8934346	-0.726169	11.0827	0.917087	0.0102396	0.00582096	0.0933268	0.264197	39	0.0237856
40	广东	中山	2013	1.05812	0.783549	0.239378	0.557603	0.519064	0.0678861	0.804316	9629280	-1.25533	11.1034	0.89332	0.0103868	0.00459564	0.0958109	0.268539	31	0.0238165
40	广东	中山	2014	1.07716	1.01799	0.21746	0.624613	0.497906	0.0729364	0.804316	9036570	-1.05804	11.1064	0.879862	0.0103138	0.00368862	0.101242	0.227951	45	0.0238191
40	广东	中山	2015	1.15516	1.07241	0.254611	0.674387	0.541228	0.0845216	0.804316	10554086	-0.82787	11.1317	0.817842	0.0100642	0.0246001	0.130623	0.268082	39	0.0239671
40	广东	中山	2016	1.1579	1.00237	0.312267	0.669268	0.513269	0.0899847	0.804316	11490146	-0.823038	11.148	0.794768	0.0119358	0.0253881	0.129626	0.281975	51	0.024135
40	广东	中山	2017	1.25719	1.08574	0.253309	0.689894	0.503098	0.0852781	0.804316	12484816	-0.804013	11.1608	0.874062	0.0128244	0.0484856	0.154883	0.384034	51	0.024475
40	广东	中山	2018	1.28151	1.01935	0.253946	0.680616	0.552192	0.0854868	0.804316	11163854	-0.798927	11.1734	0.769518	0.0132914	0.040169	0.143395	0.258769	63	0.0245461
40	广东	中山	2019	1.04616	0.816346	0.262975	0.804987	0.464824	0.0994902	0.804316	9199658	-0.431265	11.1733	0.765687	0.0121072	0.0410873	0.131805	0.319898	58	0.0246174
40	广东	中山	2020	1.01166	0.967023	0.318891	0.84839	0.454199	0.111122	0.804316	11179729	-0.248836	11.184	0.689925	0.0126792	0.027613	0.117785	0.412358	28	0.0247698
40	广东	中山	2021	1.07815	1.06572	0.315169	0.918314	0.45957	0.119362	0.804316	12890228	-0.00833887	11.2913	0.739798	0.0121673	0.0435911	0.132019	0.255684	46	0.0245611
40	广东	中山	2022	1.12758	1.04585	0.383504	0.880254	0.44314	0.12236	0.804316	12801285	-0.0997214	11.3141	0.764586	0.0130916	0.0404877	0.127497	0.360907	42	0.0244553
40	广东	中山	2023	1.0891	1.05247	0.422023	0.872032	0.426711	0.125481	0.804316	13031708	-0.111263	11.3664	0.67041	0.012754	0.0345089	0.120984	0.578774	33	0.0244057
40	广东	中山	2024	1.05061	1.0591	0.460626	0.918822	0.406051	0.135223	0.804316	1.35618e+07	0.0623949	11.4315	0.6856	0.0126877	0.0193266	0.101995	0.713109	34	0.0244098
41	广东	江门	2006	1	1	0.242023	0.403064	1.14918	0.0655809	0.305553	2676500	-1.31551	10.0208	0.92066	0.00387711	0.0136349	0.0678532	0.168989	29	0.0228511
41	广东	江门	2007	1.02762	1.02762	0.260085	0.421476	1.07824	0.0681328	0.305553	3166400	-1.29155	10.1668	0.852993	0.00413724	0.012741	0.0696788	0.217841	38	0.022693
41	广东	江门	2008	1.10521	1.0755	0.232391	0.376352	1.19727	0.0624214	0.305553	3782200	-1.3785	10.2939	0.720827	0.00447465	0.0141524	0.0731311	0.262112	43	0.0225428
41	广东	江门	2009	1.14675	1.03759	0.253652	0.433083	1.25101	0.0732483	0.305553	4920700	-1.12867	10.3323	0.562434	0.00496221	0.0204716	0.0828411	0.196599	36	0.0226455
41	广东	江门	2010	1.2015	1.04775	0.239066	0.439622	1.11424	0.0687956	0.305553	6317700	-1.21848	10.4739	0.616156	0.00523254	0.018219	0.0844462	0.230575	22	0.0230136
41	广东	江门	2011	1.1951	0.99467	0.236693	0.455129	1.0397	0.068486	0.305553	7417900	-1.2224	10.6271	0.618866	0.00594711	0.0248673	0.0894161	0.24867	38	0.023018
41	广东	江门	2012	1.20342	1.00696	0.229255	0.474811	1.19696	0.0740691	0.305553	8504100	-1.04412	10.649	0.623961	0.00680656	0.0279549	0.0990559	0.211206	22	0.0232731
41	广东	江门	2013	1.15639	0.960921	0.239378	0.487369	1.21081	0.077156	0.305553	10008400	-0.983322	10.7051	0.604706	0.00757666	0.0270068	0.105202	0.277214	41	0.0235565
41	广东	江门	2014	1.10998	0.959864	0.21746	0.54299	1.27446	0.0830036	0.305553	11116500	-0.762189	10.7373	0.596159	0.00849278	0.0280571	0.112467	0.28318	41	0.0236426
41	广东	江门	2015	1.17149	1.05542	0.254611	0.58883	1.03673	0.0868563	0.305553	13078700	-0.753658	10.8128	0.543091	0.00862189	0.0412838	0.128789	0.279574	23	0.0238328
41	广东	江门	2016	1.14973	0.981424	0.312267	0.611634	1.11475	0.0984648	0.305553	15177700	-0.574762	10.8915	0.511087	0.00867273	0.0358896	0.118185	0.250441	32	0.0240013
41	广东	江门	2017	1.02271	0.889525	0.253309	0.662598	1.04741	0.0959886	0.305553	17748300	-0.494261	10.9859	0.502518	0.00882761	0.0403838	0.121366	0.233867	39	0.0240712
41	广东	江门	2018	0.964542	0.943122	0.253946	0.700776	1.44951	0.111102	0.305553	19439712	-0.0652983	11.0636	0.492107	0.00939304	0.0445916	0.125908	0.320815	48	0.024228
41	广东	江门	2019	1.02295	1.06056	0.262975	0.748831	0.7991	0.101256	0.305553	21053208	-0.375852	11.1016	0.453066	0.0100934	0.05219	0.133718	0.239644	42	0.0241741
41	广东	江门	2020	1.04391	1.02049	0.318891	0.810693	1.13703	0.124136	0.305553	22505880	0.127922	11.1075	0.444681	0.0116525	0.0556921	0.138116	0.352103	30	0.0239228
41	广东	江门	2021	1.12446	1.07716	0.315169	0.857488	0.75628	0.119588	0.305553	22820962	0.00326927	11.2174	0.491509	0.0139765	0.0501329	0.127917	0.327305	25	0.0238493
41	广东	江门	2022	1.23468	1.09802	0.383504	0.852534	0.384399	0.117458	0.305553	22638394	-0.238099	11.2679	0.475234	0.0155908	0.0497135	0.119401	0.278999	30	0.0237027
41	广东	江门	2023	1.30221	1.13675	0.422023	0.84515	0.0125192	0.11151	0.305553	22661032	-0.510049	11.3315	0.431542	0.0185246	0.0442712	0.11318	0.37773	26	0.0236624
41	广东	江门	2024	1.36974	1.17547	0.460626	0.878021	0.00796259	0.119967	0.305553	2.33817e+07	-0.3721	11.3771	0.455239	0.0211392	0.0423687	0.108304	0.404331	45	0.0238875
42	广东	阳江	2006	1	1	0.242023	0.379495	0.769549	0.0529066	0.13544	1024600	-1.67736	9.5999	0.260754	0.00292942	0.0517396	0.0818174	0.244736	21	0.0206212
42	广东	阳江	2007	1.03899	1.03899	0.260085	0.429606	0.776353	0.0613363	0.13544	1351600	-1.48733	9.74725	0.218606	0.00293223	0.0562672	0.0884022	0.190127	32	0.0209527
42	广东	阳江	2008	1.13349	1.09095	0.232391	0.404127	0.745589	0.0541595	0.13544	1717000	-1.618	9.91436	0.181127	0.00287055	0.0618296	0.0960376	0.248656	48	0.021029
42	广东	阳江	2009	1.08666	0.958689	0.253652	0.472568	0.877563	0.0684355	0.13544	2394900	-1.27015	9.98534	0.187329	0.00262448	0.070857	0.110015	0.267392	23	0.0214762
42	广东	阳江	2010	1.11619	1.02717	0.239066	0.503246	0.882822	0.0705956	0.13544	3292000	-1.17216	10.1408	0.198436	0.00254566	0.0620325	0.105561	0.208056	21	0.0215763
42	广东	阳江	2011	1.11786	1.0015	0.236693	0.559912	0.967436	0.07942	0.13544	4006600	-0.917327	10.3024	0.190573	0.00611697	0.0632642	0.111227	0.204515	26	0.0216335
42	广东	阳江	2012	1.20484	1.07781	0.229255	0.59334	0.831517	0.0791175	0.13544	4836700	-0.909159	10.421	0.168714	0.00288728	0.0718674	0.123706	0.270708	21	0.0216953
42	广东	阳江	2013	1.05573	0.876235	0.239378	0.645448	0.824449	0.0864955	0.13544	5986600	-0.728503	10.5721	0.151804	0.00322844	0.0623784	0.117693	0.216212	24	0.0217899
42	广东	阳江	2014	1.05787	1.00203	0.21746	0.765943	0.844399	0.0991394	0.13544	6620100	-0.317728	10.6587	0.154754	0.00357297	0.056833	0.115859	0.261908	12	0.0218292
42	广东	阳江	2015	1.03898	0.982145	0.254611	0.741366	0.810161	0.0996419	0.13544	6911300	-0.39945	10.6911	0.160472	0.00384948	0.092933	0.154236	0.302604	30	0.0220284
42	广东	阳江	2016	1.08664	1.04587	0.312267	0.735603	0.712015	0.103215	0.13544	5039200	-0.44881	10.6914	0.124473	0.00389103	0.122038	0.173952	0.334417	56	0.0223035
42	广东	阳江	2017	0.98272	0.904367	0.253309	0.759864	0.693763	0.0987441	0.13544	5402100	-0.423334	10.707	0.124368	0.00406562	0.116	0.169098	0.351808	45	0.0226967
42	广东	阳江	2018	1.0862	1.1053	0.253946	0.724813	0.789126	0.0969988	0.13544	5633850	-0.472177	10.7231	0.118241	0.0041666	0.140092	0.193718	0.27295	38	0.0228983
42	广东	阳江	2019	1.01976	0.938836	0.262975	0.791039	0.707644	0.104052	0.13544	6495829	-0.299143	10.8169	0.11756	0.0042931	0.137836	0.187616	0.363117	43	0.022784
42	广东	阳江	2020	1.11534	1.09373	0.318891	0.828032	0.729945	0.11575	0.13544	7.3143e+06	-0.114265	10.8549	0.141619	0.00499098	0.136448	0.185131	0.411842	38	0.0227138
42	广东	阳江	2021	1.18497	1.06242	0.315169	0.875505	0.824775	0.123556	0.13544	10079110	0.115663	10.9624	0.177471	0.00518945	0.109152	0.160549	0.210914	30	0.0228448
42	广东	阳江	2022	1.24568	1.05123	0.383504	0.87687	0.886425	0.133384	0.13544	6775178	0.217033	10.9818	0.176696	0.00589086	0.126512	0.176036	0.332045	71	0.0228982
42	广东	阳江	2023	1.28555	1.03772	0.422023	0.885799	0.948074	0.140615	0.13544	8773856	0.322021	11.0065	0.137145	0.00577095	0.116981	0.166741	0.611605	43	0.0229592
42	广东	阳江	2024	1.32542	1.0242	0.460626	0.922508	0.986464	0.150649	0.13544	9.86918e+06	0.504916	11.0356	0.156482	0.00599713	0.105144	0.156457	0.781986	56	0.0229698
43	广东	茂名	2006	1	1	0.242023	0.376632	0.995657	0.058391	0.162701	1752440	-1.51968	9.59392	0.0448951	0.00268235	0.0353357	0.0647764	0.190022	30	0.0218768
43	广东	茂名	2007	1.07847	1.07847	0.260085	0.373737	0.977278	0.0596966	0.162701	1307057	-1.52971	9.7234	0.0451596	0.00321871	0.0383599	0.0700611	0.215379	33.5	0.0219606
43	广东	茂名	2008	1.25165	1.16058	0.232391	0.301002	0.943378	0.0466668	0.162701	1457392	-1.82442	9.89464	0.0436987	0.0033335	0.0404621	0.0713782	0.240322	37	0.0220548
43	广东	茂名	2009	1.31323	1.0492	0.253652	0.348813	0.898271	0.0538539	0.162701	1800099	-1.67833	9.93935	0.037699	0.00393852	0.0464326	0.0806539	0.227995	27	0.0223924
43	广东	茂名	2010	1.71603	1.30673	0.239066	0.352351	0.879379	0.0520758	0.162701	2445410	-1.69111	10.1441	0.0365471	0.00462842	0.0475896	0.0826375	0.225874	18	0.0225347
43	广东	茂名	2011	2.38023	1.38706	0.236693	0.374486	0.867072	0.0541817	0.162701	2172831	-1.62625	10.2686	0.0353534	0.00465731	0.0567353	0.0959465	0.215769	8	0.0223926
43	广东	茂名	2012	2.42836	1.02022	0.229255	0.406083	0.881861	0.0575441	0.162701	4273674	-1.51271	10.3621	0.0351381	0.00510988	0.061088	0.102894	0.271675	18	0.0224796
43	广东	茂名	2013	2.38845	0.983563	0.239378	0.406567	0.954342	0.060669	0.162701	6605279	-1.44981	10.5171	0.0346614	0.00525151	0.0586346	0.0999527	0.324259	15	0.0229778
43	广东	茂名	2014	1.73602	0.726841	0.21746	0.424016	0.890457	0.0585633	0.162701	8505521	-1.45378	10.5988	0.0357274	0.00478846	0.0685656	0.11082	0.33552	22	0.0230744
43	广东	茂名	2015	1.6012	0.922341	0.254611	0.434652	0.92895	0.0652435	0.162701	11154976	-1.36113	10.6254	0.0417251	0.00602612	0.0954448	0.142138	0.294315	27	0.022965
43	广东	茂名	2016	1.60204	1.00052	0.312267	0.453722	0.84672	0.0722608	0.162701	12627596	-1.31371	10.6944	0.0400035	0.00637843	0.0890217	0.135388	0.267187	22	0.022858
43	广东	茂名	2017	1.3819	0.862592	0.253309	0.46745	0.867197	0.0675024	0.162701	14157288	-1.29559	10.7818	0.0472684	0.00627598	0.0872141	0.132385	0.318625	40	0.0231612
43	广东	茂名	2018	1.4821	1.07251	0.253946	0.487164	1.12522	0.0766432	0.162701	14409288	-1.03654	10.8411	0.0485085	0.00717402	0.0933664	0.137352	0.313705	32	0.0233257
43	广东	茂名	2019	1.36274	0.919464	0.262975	0.525521	0.795135	0.0738777	0.162701	13386229	-1.14302	10.879	0.0603939	0.00918956	0.097974	0.141042	0.297035	46	0.0231049
43	广东	茂名	2020	1.32576	0.972865	0.318891	0.576719	0.783599	0.0864378	0.162701	13479933	-0.934588	10.8811	0.060876	0.0132408	0.102601	0.146023	0.353714	47	0.0228221
43	广东	茂名	2021	1.4603	1.10148	0.315169	0.619375	0.878667	0.0936615	0.162701	8297600	-0.720969	10.9924	0.0508629	0.0133391	0.0922968	0.132455	0.468247	53	0.0230301
43	广东	茂名	2022	1.65268	1.13174	0.383504	0.655084	0.938187	0.10763	0.162701	8820349	-0.503639	11.0439	0.0370336	0.0144093	0.0946629	0.130711	0.301221	79	0.0229324
43	广东	茂名	2023	1.69532	1.14654	0.422023	0.669296	0.997707	0.115451	0.162701	9287828	-0.382147	11.0631	0.0340902	0.0127144	0.0923702	0.128857	0.206327	38	0.0229862
43	广东	茂名	2024	1.73796	1.16135	0.460626	0.713399	0.986661	0.125112	0.162701	8.67028e+06	-0.210566	11.0808	0.0421411	0.0134718	0.0931305	0.13036	0.19765	39	0.0234983
44	广东	湛江	2006	1	1	0.242023	0.383144	0.931019	0.0575186	0.0967713	2067300	-1.54527	9.35132	0.216803	0.00823902	0.0500224	0.0885177	0.25079	29	0.0211798
44	广东	湛江	2007	1.07268	1.07268	0.260085	0.419886	0.938632	0.0643362	0.0967713	2428300	-1.4004	9.50843	0.211098	0.00837962	0.0603399	0.101565	0.30165	54	0.0211526
44	广东	湛江	2008	1.13273	1.05598	0.232391	0.440478	0.874194	0.0619178	0.0967713	2954000	-1.39834	9.67873	0.209436	0.00843732	0.0591482	0.100552	0.314418	49	0.0211925
44	广东	湛江	2009	1.21644	1.07389	0.253652	0.469339	0.899187	0.0685991	0.0967713	3932300	-1.26518	9.71912	0.166927	0.00937803	0.0612292	0.106878	0.273602	53	0.0218395
44	广东	湛江	2010	1.40552	1.15544	0.239066	0.459124	0.873573	0.0649678	0.0967713	3836900	-1.33	9.89579	0.172015	0.0127421	0.062891	0.110538	0.255772	40	0.021908
44	广东	湛江	2011	1.53166	1.08975	0.236693	0.493555	0.918419	0.0700501	0.0967713	4946000	-1.18073	10.0907	0.166836	0.0115374	0.0626309	0.109572	0.295466	58	0.0220277
44	广东	湛江	2012	1.58214	1.03296	0.229255	0.553765	0.942753	0.0771538	0.0967713	5722800	-0.962202	10.1695	0.159442	0.0104128	0.0680005	0.117641	0.202143	29	0.0222355
44	广东	湛江	2013	1.65332	1.04499	0.239378	0.564686	1.03739	0.0821253	0.0967713	7955800	-0.847169	10.2523	0.168042	0.0106862	0.0785118	0.130643	0.321482	32	0.0222562
44	广东	湛江	2014	1.68415	1.01865	0.21746	0.558705	1.05862	0.0793539	0.0967713	10207600	-0.868279	10.3575	0.176197	0.0109341	0.074986	0.126951	0.341708	54	0.0222964
44	广东	湛江	2015	1.64672	0.977773	0.254611	0.581822	1.19231	0.0900146	0.0967713	13136900	-0.662405	10.4101	0.138159	0.011159	0.125243	0.17778	0.337919	40	0.022448
44	广东	湛江	2016	1.45172	0.881586	0.312267	0.574803	1.18427	0.0957599	0.0967713	15316000	-0.649313	10.4804	0.122948	0.019027	0.107818	0.153226	0.305768	59	0.0223724
44	广东	湛江	2017	1.25952	0.867602	0.253309	0.611799	1.10134	0.0911753	0.0967713	16415300	-0.628166	10.5792	0.125518	0.019058	0.112096	0.161276	0.261682	37	0.0226668
44	广东	湛江	2018	1.2564	0.997525	0.253946	0.647257	1.1047	0.0956682	0.0967713	18521382	-0.503855	10.6495	0.129042	0.0192581	0.122103	0.163482	0.251851	57	0.0228132
44	广东	湛江	2019	1.21428	0.966479	0.262975	0.686755	1.43049	0.109965	0.0967713	18095390	-0.120627	10.6867	0.135833	0.0195351	0.121676	0.164632	0.328754	60	0.0227546
44	广东	湛江	2020	1.22831	1.01155	0.318891	0.744759	1.58411	0.127618	0.0967713	16991572	0.233425	10.7022	0.143838	0.0223119	0.129155	0.173553	0.372846	43	0.0225386
44	广东	湛江	2021	1.35725	1.10498	0.315169	0.752971	1.73095	0.13197	0.0967713	20236962	0.36751	10.8339	0.149832	0.0237398	0.108539	0.153526	0.369802	34	0.0225085
44	广东	湛江	2022	1.48158	1.0916	0.383504	0.838523	1.7981	0.152224	0.0967713	18294214	0.76107	10.8732	0.167059	0.0266057	0.107421	0.144324	0.393026	37	0.0223955
44	广东	湛江	2023	1.53787	1.11512	0.422023	0.849515	1.86525	0.159849	0.0967713	18879628	0.877194	10.8892	0.185032	0.0271862	0.102737	0.143761	0.477723	61	0.0224387
44	广东	湛江	2024	1.59417	1.13864	0.460626	0.897639	2.07831	0.175783	0.0967713	1.9042e+07	1.22853	10.8954	0.160443	0.02971	0.0958585	0.138818	0.545522	60	0.0229557
45	广东	潮州	2006	1	1	0.242023	0.367444	1.0851	0.0595767	0.328733	1097358	-1.48487	9.44762	0.567822	0.00425436	0.0512462	0.0843433	0.221928	39	0.0226733
45	广东	潮州	2007	0.856588	0.856588	0.260085	0.406685	0.997754	0.0642494	0.328733	1210386	-1.40178	9.58835	0.440791	0.00508741	0.0534671	0.0894853	0.190451	24	0.0227441
45	广东	潮州	2008	0.956721	1.1169	0.232391	0.335745	0.976475	0.0517644	0.328733	1356723	-1.68101	9.7338	0.353396	0.0050689	0.0488289	0.085365	0.245955	44	0.0228264
45	广东	潮州	2009	1.00998	1.05567	0.253652	0.346403	1.11267	0.0590915	0.328733	1629762	-1.52777	9.81238	0.39699	0.00560107	0.0543104	0.092359	0.269336	31	0.0230589
45	广东	潮州	2010	1.11527	1.10424	0.239066	0.709979	0.981191	0.0983852	0.328733	1827785	-0.391795	9.94399	0.465018	0.00619064	0.0588309	0.100609	0.328996	26	0.0230456
45	广东	潮州	2011	1.2577	1.12772	0.236693	0.323881	1.11106	0.0542959	0.328733	1999648	-1.61871	10.0934	0.417462	0.00661894	0.0560073	0.0981635	0.250565	41	0.023176
45	广东	潮州	2012	1.79125	1.42422	0.229255	0.326253	1.12386	0.0540374	0.328733	2241572	-1.60667	10.1759	0.379143	0.0065962	0.0651288	0.110455	0.258372	48	0.0231572
45	广东	潮州	2013	0.771353	0.430623	0.239378	0.338296	0.813704	0.0487014	0.328733	2536278	-1.78762	10.2666	0.314143	0.00611692	0.0636176	0.111645	0.337561	29	0.0232775
45	广东	潮州	2014	0.78069	1.0121	0.21746	0.355678	0.798076	0.0478325	0.328733	3130138	-1.75608	10.3428	0.252316	0.00640992	0.0778454	0.127366	0.326826	42	0.023032
45	广东	潮州	2015	0.872431	1.11751	0.254611	0.342918	0.785198	0.0503295	0.328733	3919450	-1.78154	10.443	0.219535	0.00740992	0.112748	0.165717	0.343927	21	0.0232437
45	广东	潮州	2016	0.886069	1.01563	0.312267	0.306214	0.703912	0.0505588	0.328733	4546211	-1.9243	10.5063	0.212343	0.00744045	0.107862	0.154689	0.217862	46	0.0233396
45	广东	潮州	2017	0.779974	0.880263	0.253309	0.316635	0.726576	0.0454529	0.328733	5010460	-1.91588	10.5208	0.218646	0.00730711	0.102198	0.148624	0.338459	40	0.0234137
45	广东	潮州	2018	0.790665	1.01371	0.253946	0.304765	0.741135	0.0444538	0.328733	4247987	-1.94525	10.5673	0.205941	0.00721533	0.136794	0.183913	0.244161	34	0.0234963
45	广东	潮州	2019	0.876719	1.10884	0.262975	0.313676	0.810446	0.0483971	0.328733	4509940	-1.85667	10.6437	0.199382	0.00707577	0.137727	0.18206	0.301828	30	0.0233931
45	广东	潮州	2020	1.91885	2.18867	0.318891	0.338824	0.71043	0.0554923	0.328733	4253483	-1.80293	10.6683	0.164555	0.00821866	0.152818	0.196912	0.440624	18	0.0233446
45	广东	潮州	2021	0.776007	0.404413	0.315169	0.378837	0.754159	0.0610685	0.328733	4321499	-1.63638	10.786	0.193659	0.00892605	0.127117	0.168716	0.471315	31	0.0234601
45	广东	潮州	2022	0.813899	1.04883	0.383504	0.390604	0.761532	0.0707671	0.328733	4340776	-1.53961	10.8428	0.20059	0.00998447	0.125754	0.163106	0.472913	43	0.0233664
45	广东	潮州	2023	0.819708	1.05761	0.422023	0.411883	0.768904	0.0781059	0.328733	3.7895e+06	-1.43256	10.8716	0.186924	0.0111598	0.10477	0.148755	0.583107	36	0.0233847
45	广东	潮州	2024	0.825516	1.06639	0.460626	0.437671	0.776766	0.0860179	0.328733	3.71238e+06	-1.30965	10.9046	0.201699	0.0124156	0.106827	0.152584	0.699972	34	0.0234636
46	广东	揭阳	2006	1	1	0.242023	0.361666	0.983606	0.0562521	0.192114	1521996	-1.57982	9.03842	0.280213	0.00163773	0.0553705	0.084024	0.177323	24	0.0220551
46	广东	揭阳	2007	0.86043	0.86043	0.260085	0.379412	0.965178	0.0600776	0.192114	2012900	-1.51925	9.22434	0.271336	0.00174827	0.0584061	0.0880196	0.201743	23	0.0220422
46	广东	揭阳	2008	0.91997	1.0692	0.232391	0.322171	0.923044	0.0487277	0.192114	2657855	-1.76704	9.43199	0.236882	0.00183629	0.0553616	0.0863459	0.202918	25	0.0220935
46	广东	揭阳	2009	0.972424	1.05702	0.253652	0.40085	0.8713	0.059514	0.192114	3934955	-1.52022	9.53163	0.254191	0.00162273	0.0597961	0.095821	0.315945	13	0.0224099
46	广东	揭阳	2010	1.07372	1.10417	0.239066	0.41607	0.898183	0.060344	0.192114	5640729	-1.45912	9.7102	0.253176	0.00144382	0.0577742	0.0976274	0.170419	12	0.0223747
46	广东	揭阳	2011	1.19212	1.11028	0.236693	0.444238	0.915746	0.0639574	0.192114	6580750	-1.35148	9.89599	0.234507	0.00150153	0.0666758	0.106516	0.215432	16	0.0223579
46	广东	揭阳	2012	1.41293	1.18522	0.229255	0.468695	0.84093	0.0641356	0.192114	6635126	-1.32876	10.0142	0.206614	0.00178937	0.0710321	0.114441	0.358325	34	0.0223965
46	广东	揭阳	2013	1.03496	0.732494	0.239378	0.469272	0.594088	0.0590327	0.192114	8293908	-1.50206	10.132	0.198322	0.00202617	0.0662363	0.111747	0.328487	31	0.0224586
46	广东	揭阳	2014	0.961404	0.928926	0.21746	0.508968	0.564461	0.0605282	0.192114	10938001	-1.40452	10.2252	0.20909	0.00210481	0.0708651	0.116785	0.226043	47	0.0226898
46	广东	揭阳	2015	0.982157	1.02159	0.254611	0.504333	0.545214	0.0638533	0.192114	13620998	-1.40689	10.267	0.263629	0.0020754	0.119852	0.166355	0.245375	47	0.0231041
46	广东	揭阳	2016	1.10339	1.12344	0.312267	0.49195	0.558826	0.0695018	0.192114	14855429	-1.39612	10.3511	0.260371	0.00207145	0.107135	0.14795	0.30654	53	0.0235396
46	广东	揭阳	2017	0.865462	0.784366	0.253309	0.501839	0.599433	0.0647938	0.192114	16673072	-1.37624	10.3826	0.22963	0.0020667	0.11499	0.154503	0.28019	96	0.0241068
46	广东	揭阳	2018	2.31094	2.67018	0.253946	0.504621	0.685805	0.0674376	0.192114	10133174	-1.30226	10.474	0.171778	0.00201357	0.117077	0.156705	0.320595	51	0.0243365
46	广东	揭阳	2019	1.30792	0.565971	0.262975	0.484294	0.541179	0.0622894	0.192114	11519255	-1.47221	10.526	0.155198	0.00190764	0.131753	0.166526	0.265944	61	0.0243652
46	广东	揭阳	2020	1.37604	1.05208	0.318891	0.475872	0.437385	0.0651868	0.192114	11807500	-1.53615	10.5302	0.092523	0.00207719	0.143922	0.179349	0.348756	41	0.024337
46	广东	揭阳	2021	1.73083	1.25783	0.315169	0.490376	0.441555	0.0666265	0.192114	11051820	-1.4862	10.6118	0.0824789	0.00211829	0.125578	0.160348	0.367963	37	0.0244034
46	广东	揭阳	2022	2.59429	1.49887	0.383504	0.463999	0.42416	0.0710269	0.192114	8449116	-1.53832	10.6069	0.0718736	0.00264372	0.133276	0.164631	0.386921	59	0.0245279
46	广东	揭阳	2023	2.66513	1.20605	0.422023	0.472435	0.406765	0.0761578	0.192114	6835335	-1.49357	10.6747	0.0936206	0.00283094	0.11687	0.158224	0.503678	53	0.0243805
46	广东	揭阳	2024	2.73597	0.91322	0.460626	0.4665	0.368241	0.0789983	0.192114	6.38599e+06	-1.51358	10.7037	0.0968573	0.00305294	0.0983358	0.138574	0.55901	38	0.0241963
47	广西	北海	2006	1	1	2.25621	0.739176	1.28183	0.347954	0.211272	672400	1.43733	9.412	0.121826	0.00467862	0.0573105	0.130861	0.220651	2.20535	0.0209503
47	广西	北海	2007	1.01969	1.01969	2.27518	0.661555	1.27239	0.34047	0.211272	874000	1.17886	9.61812	0.160907	0.00587293	0.0617782	0.142536	0.196897	3.14464	0.0214343
47	广西	北海	2008	1.05766	1.03724	2.1853	0.51913	1.10229	0.308069	0.211272	2003000	0.49833	9.81366	0.171641	0.00832751	0.0588338	0.108696	0.261641	4.48398	0.0216054
47	广西	北海	2009	1.00444	0.949676	2.82301	0.506169	1.16787	0.383497	0.211272	3218500	0.978816	9.95948	0.161797	0.0100019	0.100431	0.151643	0.188181	6.39377	0.0216309
47	广西	北海	2010	0.900395	0.896419	2.61659	0.528671	1.09745	0.360049	0.211272	4852600	0.849505	10.1762	0.229537	0.0148119	0.0878586	0.155885	0.256168	9.11696	0.0216716
47	广西	北海	2011	0.793175	0.880919	2.60538	0.538376	1.1529	0.361341	0.211272	6031900	0.915412	10.4112	0.214125	0.016984	0.0921147	0.163863	0.177396	13	0.0214526
47	广西	北海	2012	0.814041	1.02631	2.382	0.538826	1.1313	0.334455	0.211272	7253600	0.734124	10.5741	0.213388	0.015458	0.0936921	0.160594	0.201706	29	0.0215046
47	广西	北海	2013	0.896622	1.10145	2.23234	0.591636	1.51249	0.333065	0.211272	6749000	1.08542	10.7168	0.232969	0.0103761	0.0799643	0.138669	0.225963	46	0.0216426
47	广西	北海	2014	0.942529	1.0512	2.10409	0.637612	1.47828	0.32265	0.211272	7977100	1.12164	10.8512	0.259853	0.0135936	0.069759	0.126864	0.243128	30	0.0216982
47	广西	北海	2015	0.904145	0.959275	2.17999	0.646815	1.69471	0.338324	0.211272	9325400	1.37013	10.8595	0.279128	0.0169158	0.0994916	0.155782	0.276949	32	0.0220163
47	广西	北海	2016	0.939316	1.0389	2.32155	0.656113	1.31367	0.346347	0.211272	10111000	1.22545	10.956	0.211522	0.0197725	0.106174	0.15934	0.321001	51	0.022117
47	广西	北海	2017	1.02841	1.09486	2.01306	0.697165	1.26029	0.313548	0.211272	10996800	1.096	11.0513	0.219908	0.0204413	0.0889025	0.150276	0.435464	48	0.0221891
47	广西	北海	2018	0.977912	0.950892	2.30534	0.690229	1.11599	0.343499	0.211272	11876544	1.18368	11.1653	0.229672	0.0148214	0.0875145	0.147919	0.364025	40	0.0223768
47	广西	北海	2019	0.992224	1.01464	2.4373	0.679542	0.88645	0.351857	0.211272	12945433	1.07564	11.2449	0.226092	0.0296937	0.0941267	0.154159	0.296919	41	0.0224581
47	广西	北海	2020	0.919002	0.926204	2.8466	0.72902	0.812849	0.404344	0.211272	15133211	1.49614	11.1392	0.210446	0.0264604	0.104376	0.166565	0.316586	39	0.0229607
47	广西	北海	2021	0.985241	1.07208	4.50533	0.805711	0.83172	0.610111	0.211272	16812998	3.01141	11.2941	0.199512	0.0252617	0.0711898	0.119135	0.377601	29	0.0227789
47	广西	北海	2022	1.06882	1.08483	4.49732	0.856786	0.80988	0.614839	0.211272	16039600	3.16404	11.3965	0.205512	0.0266879	0.073252	0.113659	0.445088	38	0.0225898
47	广西	北海	2023	1.09155	1.11832	5.38843	0.909766	0.788041	0.725997	0.211272	14804551	3.99471	11.4373	0.211971	0.0276496	0.0687757	0.110811	0.668346	28	0.0226528
47	广西	北海	2024	1.11428	1.15181	6.37455	0.962124	0.737807	0.847567	0.211272	1.55359e+07	4.87318	11.5032	0.200245	0.0283379	0.0721966	0.113599	0.769259	48	0.0223602
48	广西	钦州	2006	1	1	2.25621	0.598381	0.72641	0.316426	0.161373	1178800	0.544093	8.86614	0.153242	0.00154689	0.0630292	0.10873	0.179651	20	0.0194972
48	广西	钦州	2007	1.01139	1.01139	2.27518	0.652383	0.711074	0.324866	0.161373	1659300	0.731709	9.06847	0.227963	0.00439294	0.0689151	0.115405	0.158274	25	0.0198381
48	广西	钦州	2008	1.11006	1.09756	2.1853	0.614648	0.721766	0.309918	0.161373	2489100	0.543365	9.23828	0.265576	0.00705904	0.091889	0.146926	0.272581	34	0.0201463
48	广西	钦州	2009	1.05084	0.946656	2.82301	0.677105	0.710041	0.392563	0.161373	3746500	1.2247	9.34412	0.162264	0.00668343	0.122026	0.178373	0.312248	29	0.0206402
48	广西	钦州	2010	1.06039	1.00909	2.61659	0.678356	0.68801	0.367767	0.161373	4516000	1.0585	9.64871	0.185896	0.00603955	0.116546	0.163382	0.241948	37	0.0209922
48	广西	钦州	2011	0.998756	0.941873	2.60538	0.694735	0.69434	0.368607	0.161373	5583400	1.11087	9.85692	0.32448	0.00537047	0.119706	0.162781	0.330626	31	0.0209078
48	广西	钦州	2012	0.957855	0.959047	2.382	0.707341	0.608657	0.341553	0.161373	6525900	0.923711	9.91151	0.376382	0.00414898	0.140777	0.193934	0.266172	25	0.0213585
48	广西	钦州	2013	0.888701	0.927803	2.23234	0.711071	0.642064	0.325194	0.161373	6097200	0.849445	9.9796	0.320685	0.00487465	0.13099	0.196917	0.328942	38	0.02153
48	广西	钦州	2014	0.908944	1.02278	2.10409	0.68269	0.605072	0.305625	0.161373	7269500	0.629132	10.1121	0.418153	0.00597372	0.119479	0.180272	0.294223	13	0.0221188
48	广西	钦州	2015	0.94032	1.03452	2.17999	0.668533	0.568729	0.311924	0.161373	8101000	0.610455	10.225	0.410014	0.00685508	0.160638	0.217505	0.339327	25	0.0223652
48	广西	钦州	2016	1.05009	1.11673	2.32155	0.656405	0.545778	0.32657	0.161373	9508900	0.657675	10.2928	0.307224	0.00585877	0.157278	0.208994	0.279528	57	0.0224969
48	广西	钦州	2017	1.1905	1.13371	2.01306	0.67701	0.549976	0.292758	0.161373	10888500	0.500898	10.4131	0.310226	0.00579268	0.14023	0.188591	0.33607	61	0.0226464
48	广西	钦州	2018	1.10802	0.930723	2.30534	0.693376	0.564858	0.329663	0.161373	12162454	0.786226	10.5119	0.187206	0.0083525	0.138333	0.182884	0.28561	47	0.0226849
48	广西	钦州	2019	1.01834	0.919062	2.4373	0.72559	0.638576	0.351086	0.161373	13621948	1.04963	10.6165	0.150589	0.00746067	0.123655	0.165963	0.35299	38	0.0225433
48	广西	钦州	2020	1.02801	1.00949	2.8466	0.823987	0.78278	0.415168	0.161373	15229338	1.79887	10.6445	0.156932	0.00922453	0.124366	0.171246	0.224841	35	0.0230639
48	广西	钦州	2021	1.11644	1.08603	4.50533	0.887211	0.831707	0.620065	0.161373	19359534	3.29032	10.8377	0.151914	0.0104809	0.103119	0.14603	0.29486	37	0.0229561
48	广西	钦州	2022	1.21572	1.08893	4.49732	0.914972	0.841158	0.622753	0.161373	23790932	3.38633	10.9643	0.334996	0.0117236	0.0954825	0.135686	0.420662	36	0.0229297
48	广西	钦州	2023	1.24265	1.12848	5.38843	0.952752	0.850609	0.732862	0.161373	27811600	4.18817	10.9877	0.386804	0.0123029	0.0967633	0.139898	0.54924	26	0.0231117
48	广西	钦州	2024	1.26957	1.16803	6.37455	1.0159	0.925706	0.858983	0.161373	3.28572e+07	5.19638	10.945	0.439137	0.0134013	0.118193	0.166544	0.649927	34	0.0223006
49	广西	防城港	2006	1	1	2.25621	0.570471	0.655787	0.311194	0.235595	689600	0.396265	9.56196	0.704663	0.00166554	0.0748218	0.119577	0.232159	14	0.0212147
49	广西	防城港	2007	0.901296	0.901296	2.27518	0.564254	0.525947	0.309325	0.235595	1035300	0.292984	9.83375	0.717166	0.0016741	0.0733269	0.123375	0.215125	9	0.0215655
49	广西	防城港	2008	0.873543	0.969207	2.1853	0.488521	0.558608	0.290302	0.235595	1463200	-0.00912791	10.0637	0.774514	0.0016862	0.0733444	0.132444	0.210291	25	0.0219579
49	广西	防城港	2009	0.808767	0.925847	2.82301	0.519861	0.492419	0.367741	0.235595	2541000	0.525374	10.1843	0.655974	0.00172448	0.0957673	0.177544	0.262886	21	0.0219083
49	广西	防城港	2010	0.757675	0.936827	2.61659	0.572648	0.467395	0.349163	0.235595	3768400	0.533325	10.4145	0.655271	0.00177776	0.10338	0.181884	0.255536	23	0.0221226
49	广西	防城港	2011	0.703945	0.929086	2.60538	0.624017	0.46809	0.354132	0.235595	4912700	0.701269	10.6361	0.725532	0.00187261	0.0888348	0.166261	0.233477	32	0.022024
49	广西	防城港	2012	0.645231	0.916592	2.382	0.713061	0.499634	0.339438	0.235595	5503900	0.862534	10.6893	0.794437	0.00202954	0.100665	0.192004	0.300051	26	0.022105
49	广西	防城港	2013	0.667549	1.03459	2.23234	0.773489	0.550882	0.330465	0.235595	4754500	0.995518	10.7951	0.607274	0.00367075	0.108925	0.201751	0.246721	13	0.0221422
49	广西	防城港	2014	0.67114	1.00538	2.10409	0.808536	0.658622	0.322378	0.235595	4999100	1.09947	10.8444	0.721946	0.00374449	0.111904	0.209581	0.343454	17	0.0220932
49	广西	防城港	2015	0.657479	0.979644	2.17999	0.836829	0.532727	0.331551	0.235595	5497400	1.15974	10.9139	1.06188	0.00391986	0.157916	0.261085	0.334553	38	0.0220614
49	广西	防城港	2016	0.705104	1.07244	2.32155	0.909596	0.497475	0.356249	0.235595	6001400	1.48839	10.999	1.04179	0.00387513	0.129479	0.229624	0.40432	22	0.0220265
49	广西	防城港	2017	0.858928	1.21816	2.01306	1.01758	0.548085	0.334308	0.235595	6727700	1.66501	11.1005	1.23227	0.00584982	0.117068	0.193539	0.283867	30	0.0220128
49	广西	防城港	2018	0.782887	0.911471	2.30534	0.913597	0.695772	0.35994	0.235595	6.66715e+06	1.63685	11.1484	1.08593	0.00514004	0.125904	0.19233	0.245278	63	0.0221292
49	广西	防城港	2019	0.815674	1.04188	2.4373	0.90945	0.923373	0.380892	0.235595	7.20052e+06	1.8898	11.1951	1.14791	0.0050851	0.131369	0.198979	0.372076	57	0.022169
49	广西	防城港	2020	0.708965	0.869177	2.8466	0.930299	0.754604	0.427426	0.235595	7.83417e+06	2.14183	11.1557	0.966616	0.00496467	0.138471	0.211739	0.40851	34	0.0222526
49	广西	防城港	2021	0.924552	1.30409	4.50533	0.93214	0.890526	0.627071	0.235595	6.79849e+06	3.48764	11.3924	0.945284	0.00406889	0.0983006	0.152676	0.302553	38	0.0220117
49	广西	防城港	2022	1.78369	1.92925	4.49732	0.967779	1.02167	0.633861	0.235595	7057514	3.70076	11.4231	0.810446	0.00302143	0.109754	0.155268	0.392751	34	0.0220654
49	广西	防城港	2023	2.03389	2.1837	5.38843	1.08253	1.15282	0.756511	0.235595	7.12103e+06	4.85615	11.4812	0.962644	0.00285292	0.0970829	0.155126	0.546783	39	0.0221045
49	广西	防城港	2024	2.2841	2.43814	6.37455	1.12089	1.29119	0.881238	0.235595	7.2391e+06	5.82641	11.585	1.09809	0.00271152	0.0924671	0.138915	0.66115	30	0.0221957
50	海南	海口	2006	1	1	0.192633	0.918829	0.292887	0.100651	0.265296	1574400	-0.221555	9.90847	0.107813	0.0348021	0.0313137	0.0908155	0.199953	46	0.0254277
50	海南	海口	2007	1.15798	1.15798	0.1912	0.850483	1.09223	0.112759	0.265296	1818300	0.135545	10.0072	0.369374	0.0461677	0.0408674	0.106301	0.185779	31	0.0256811
50	海南	海口	2008	1.13544	0.980536	0.201278	0.80358	1.12256	0.109002	0.265296	2214300	0.00501867	10.1096	0.556449	0.0501205	0.0349439	0.103745	0.260281	24	0.0258972
50	海南	海口	2009	1.23716	1.08959	0.300807	0.890749	0.990432	0.127996	0.265296	2770300	0.279806	10.2012	0.514427	0.0501223	0.0557914	0.131761	0.266631	19	0.0262091
50	海南	海口	2010	1.25321	1.01297	0.261859	0.340607	1.04878	0.0577044	0.265296	3498200	-1.5888	10.337	0.423127	0.0507558	0.0466807	0.126467	0.256569	41	0.0263471
50	海南	海口	2011	0.903298	0.72079	0.258311	1.04548	0.871664	0.138812	0.265296	4045900	0.689635	10.4825	0.334065	0.0502024	0.050541	0.130527	0.305575	20	0.0264359
50	海南	海口	2012	0.921455	1.0201	0.255824	0.939143	0.917353	0.126708	0.265296	5103800	0.357698	10.5632	0.309931	0.0520463	0.0473741	0.132605	0.331436	20	0.026608
50	海南	海口	2013	0.836966	0.908309	0.256044	0.880433	1.05982	0.123239	0.265296	6492400	0.262469	10.6819	0.321712	0.0643736	0.0457509	0.133402	0.309193	32	0.0268086
50	海南	海口	2014	0.94809	1.13277	0.265875	0.93562	1.48863	0.142205	0.265296	8245700	0.776289	10.7463	0.191312	0.0768427	0.0465328	0.138243	0.251633	27	0.0269624
50	海南	海口	2015	0.94356	0.995222	0.289893	0.922582	1.32722	0.139285	0.265296	10120500	0.630054	10.7651	0.236455	0.0623484	0.0519862	0.14952	0.347531	22	0.0271459
50	海南	海口	2016	1.0169	1.07773	0.275112	0.861231	1.48588	0.134139	0.265296	12717300	0.526575	10.8629	0.199808	0.0592753	0.0650658	0.153705	0.269145	63	0.0272097
50	海南	海口	2017	1.03322	1.01605	0.29347	0.736432	1.55396	0.122821	0.265296	14155000	0.16361	10.9137	0.147718	0.0566558	0.0513381	0.139547	0.359248	52	0.0273384
50	海南	海口	2018	1.14372	1.10694	0.257471	1.00324	1.6326	0.153187	0.265296	13277390	1.10806	10.956	0.219352	0.0565221	0.0445247	0.155156	0.351735	46	0.0274368
50	海南	海口	2019	1.20877	1.05688	0.240786	1.09531	1.43075	0.157254	0.265296	11232672	1.26119	11.011	0.197643	0.058814	0.0479608	0.158356	0.275595	46	0.0275278
50	海南	海口	2020	1.10089	0.910747	0.248288	1.14957	1.38921	0.163695	0.265296	12344706	1.4217	11.0451	0.206827	0.0645168	0.0672461	0.170618	0.429029	30	0.0274383
50	海南	海口	2021	1.20923	1.09841	0.192647	1.08366	1.49888	0.151903	0.265296	13376723	1.23582	11.1576	0.230771	0.0706888	0.0323498	0.134551	0.26986	58	0.0274533
50	海南	海口	2022	1.33654	1.10528	0.199659	1.03353	1.53412	0.147517	0.265296	11677879	1.09559	11.2061	0.282355	0.0738412	0.0591128	0.153806	0.324064	52	0.0272167
50	海南	海口	2023	1.38475	1.10487	0.188829	1.0225	1.56935	0.1458	0.265296	12203384	1.07586	11.281	0.333036	0.0765848	0.0431317	0.155244	0.388934	39	0.0273481
50	海南	海口	2024	1.43295	1.10445	0.181564	1.02803	1.5608	0.145397	0.265296	1.20731e+07	1.08303	11.3084	0.347972	0.0805568	0.0460652	0.150597	0.417739	58	0.0273738
51	海南	三亚	2006	1	1	0.192633	0.47105	0.741426	0.0575305	0.151988	686486	-1.42175	9.68316	0.041471	0.0148843	0.0301586	0.14334	0.192044	32	0.0230728
51	海南	三亚	2007	1.03264	1.03264	0.1912	0.418168	0.843047	0.0535241	0.151988	1097068	-1.52852	9.93688	0.18282	0.02512	0.0291764	0.164719	0.243032	44	0.023725
51	海南	三亚	2008	1.31877	1.27708	0.201278	0.340219	0.572482	0.0382121	0.151988	1542092	-1.98817	10.2397	0.150783	0.0383345	0.0479363	0.181293	0.287144	48	0.0238858
51	海南	三亚	2009	0.846406	0.641815	0.300807	0.305119	0.562859	0.0454319	0.151988	2113897	-2.04108	10.3631	0.12021	0.0566534	0.0747538	0.220205	0.289583	34	0.0243136
51	海南	三亚	2010	0.832734	0.983846	0.261859	0.370923	0.600936	0.0498519	0.151988	3052395	-1.81677	10.4536	0.0262913	0.0530957	0.0472496	0.224087	0.31021	33	0.0248273
51	海南	三亚	2011	0.84783	1.01813	0.258311	0.448774	0.634702	0.0598131	0.151988	3582982	-1.52798	10.5677	0.0285065	0.0561576	0.0752204	0.249831	0.216172	63	0.0250512
51	海南	三亚	2012	0.866251	1.02173	0.255824	0.454439	0.565451	0.0584245	0.151988	4303402	-1.56174	10.6254	0.0297588	0.0560558	0.0692258	0.254703	0.299257	37	0.0251779
51	海南	三亚	2013	1.24323	1.43519	0.256044	0.659196	0.788549	0.0892168	0.151988	5233801	-0.695599	10.7134	0.0255659	0.0513183	0.0571816	0.241667	0.217633	25	0.025384
51	海南	三亚	2014	1.11576	0.897472	0.265875	0.771365	1.89763	0.132696	0.151988	6.30012e+06	0.517105	10.7687	0.00622746	0.0540416	0.0673547	0.260691	0.26561	34	0.0251305
51	海南	三亚	2015	0.3847	0.344786	0.289893	0.720332	2.37833	0.141702	0.151988	7.05967e+06	0.716447	10.8347	0.0342708	0.0551306	0.0666338	0.268173	0.391094	37	0.0254677
51	海南	三亚	2016	1.50591	3.91451	0.275112	0.728422	2.10659	0.133933	0.151988	7830871	0.531816	10.9124	0.0758057	0.0539593	0.0733965	0.255072	0.321313	43	0.025522
51	海南	三亚	2017	0.581014	0.385821	0.29347	0.758157	2.20118	0.142174	0.151988	8680863	0.717355	10.9786	0.0914689	0.0529202	0.0678618	0.238091	0.235132	24	0.0256472
51	海南	三亚	2018	0.51404	0.88473	0.257471	0.828764	2.19221	0.146315	0.151988	7.56103e+06	0.92546	11.0811	0.101095	0.0530721	0.125971	0.287356	0.405641	51	0.0261919
51	海南	三亚	2019	0.296129	0.576082	0.240786	0.859304	1.77665	0.137352	0.151988	6947076	0.709711	11.1522	0.141317	0.0560971	0.154234	0.312545	0.355882	63	0.0263234
51	海南	三亚	2020	0.308629	1.04221	0.248288	0.77511	1.37588	0.117614	0.151988	7315271	0.130328	11.1323	0.242626	0.0587622	0.125926	0.281675	0.309544	49	0.0261042
51	海南	三亚	2021	0.316326	1.02494	0.192647	0.755056	1.44452	0.110363	0.151988	8.10532e+06	0.0709814	11.2972	0.256282	0.0626844	0.100148	0.237777	0.382738	70	0.0263308
51	海南	三亚	2022	0.326695	1.03278	0.199659	0.711885	1.44262	0.10587	0.151988	6.50857e+06	-0.0729255	11.306	0.247442	0.0667624	0.151078	0.264171	0.307964	62	0.0261299
51	海南	三亚	2023	0.279858	1.06979	0.188829	0.688194	1.44073	0.101648	0.151988	6.74939e+06	-0.163494	11.388	0.246066	0.0606483	0.0871656	0.238186	0.327141	62	0.026505
51	海南	三亚	2024	0.233022	1.1068	0.181564	0.663769	1.33473	0.0950714	0.151988	6.64113e+06	-0.331023	11.4078	0.307636	0.0676409	0.0979049	0.251334	0.317359	57	0.0262935
